# Supplementary material for: Copper complexes and carbon nanotube–copper ferrite-catalyzed benzenoid A-ring selenation of quinones: an efficient method for the synthesis of trypanocidal agents
Source: Royal Society of Chemistry journal article supplement (doi:10.1039/c9nj02026h), 2019-01-01

## Supplementary Information

### **Copper complexes and carbon nanotube-copper ferrite-catalyzed benzenoid A-ring selenation of quinones: An efficient method for the synthesis of trypanocidal agents**

Guilherme A. M. Jardim,<sup>a,b</sup> Icaro A. O. Bozzi,<sup>a</sup> Willian X. C. Oliveira,<sup>a</sup> Camila Mesquita-Rodrigues,<sup>c</sup> Rubem F. S. Menna-Barreto,<sup>c</sup> Ramar A. Kumar,<sup>d,e</sup> Edmond Gravel,<sup>d</sup> Eric Doris,<sup>d\*</sup> Antonio L. Braga<sup>b</sup> and Eufrânio N. da Silva Júnior<sup>a\*</sup>

<sup>a</sup>Institute of Exact Sciences, Department of Chemistry, Federal University of Minas Gerais, Belo Horizonte, MG, 31270-901, Brazil. E-mail: eufranio@ufmg.br;

<sup>b</sup>Department of Chemistry, Federal University of Santa Catarina, 88040-900 Florianópolis, Brazil;

<sup>c</sup>Oswaldo Cruz Institute, FIOCRUZ, Rio de Janeiro, RJ, 21045-900, Brazil;

<sup>d</sup>Service de Chimie Bioorganique et de Marquage (SCBM) CEA, Université Paris-Saclay 91191 Gif-sur-Yvette (France), E-mail: eric.doris@cea.fr;

<sup>e</sup>SRM Research Institute, Department of Chemistry, SRM Institute of Science and Technology, Kattankulathur, 603203 Chennai, India.

### Contents

|                                              |     |
|----------------------------------------------|-----|
| A) Copies of NMR spectra of novel compounds  | S02 |
| B) Copies of HRMS spectra of novel compounds | S27 |

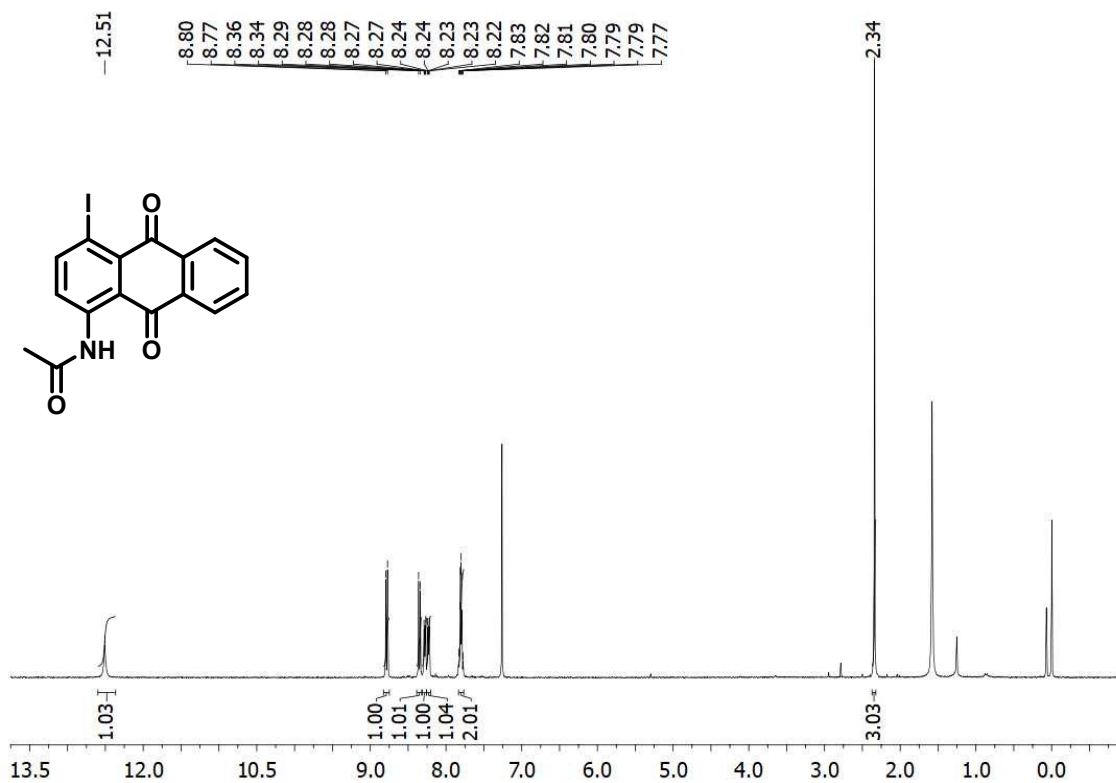

<sup>1</sup>H NMR spectrum (400 MHz, CDCl<sub>3</sub>) of compound **1p**

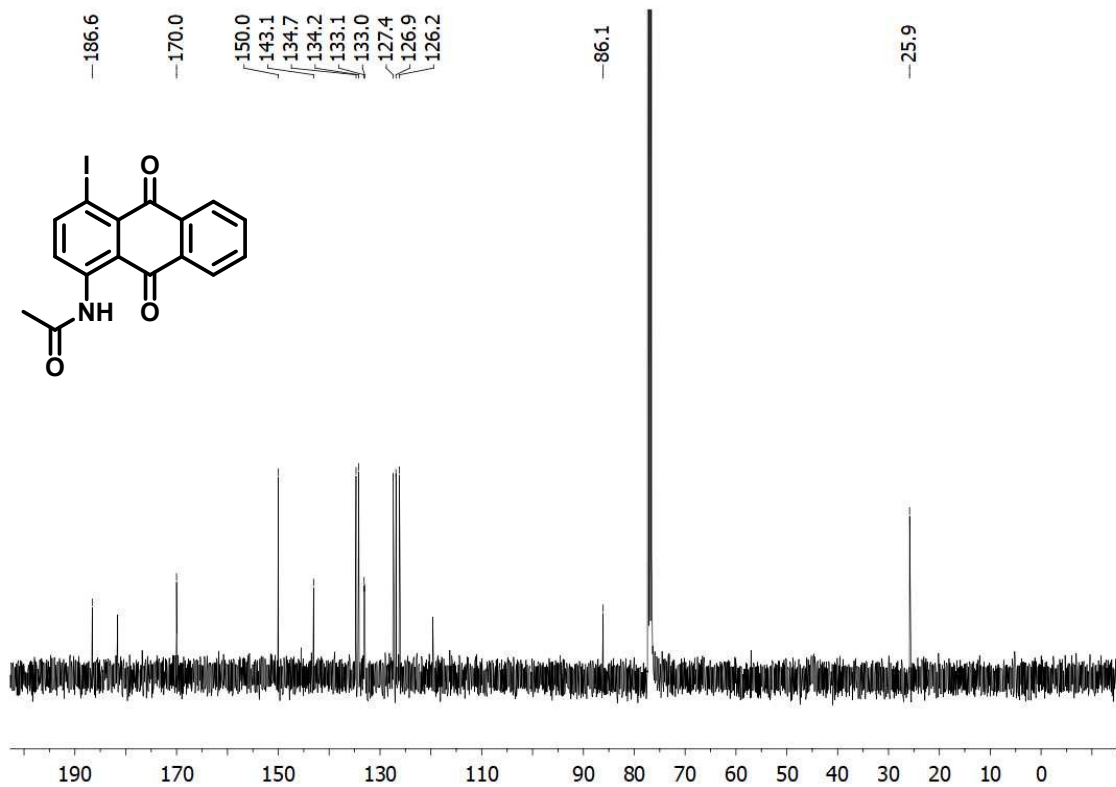

<sup>13</sup>C NMR spectrum (100 MHz, CDCl<sub>3</sub>) of compound **1p**

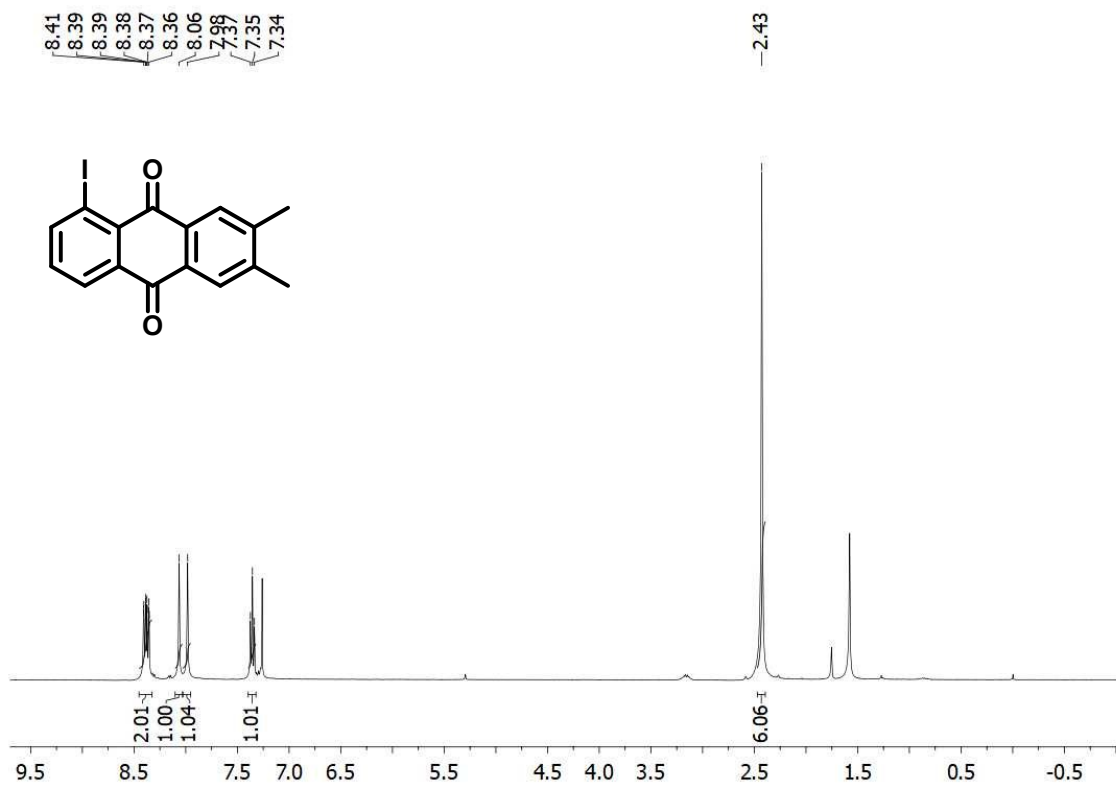

$^1\text{H}$  NMR spectrum (400 MHz,  $\text{CDCl}_3$ ) of compound **1r**

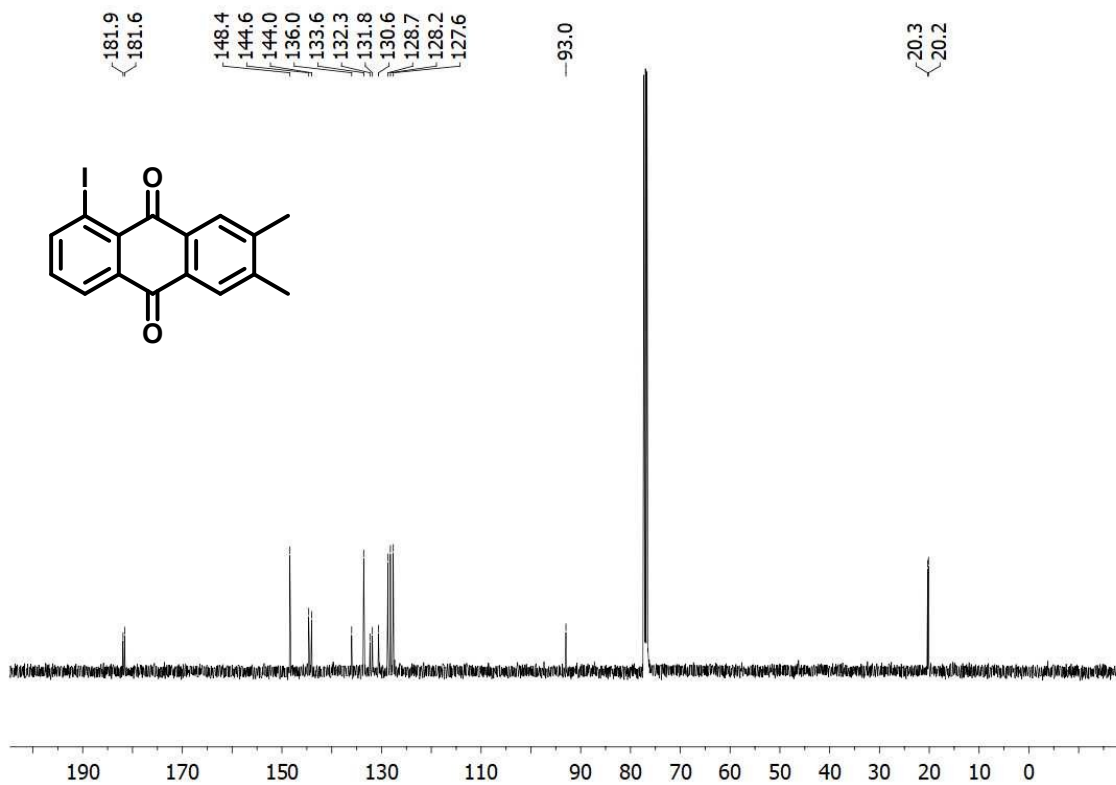

$^{13}\text{C}$  NMR spectrum (100 MHz,  $\text{CDCl}_3$ ) of compound **1r**

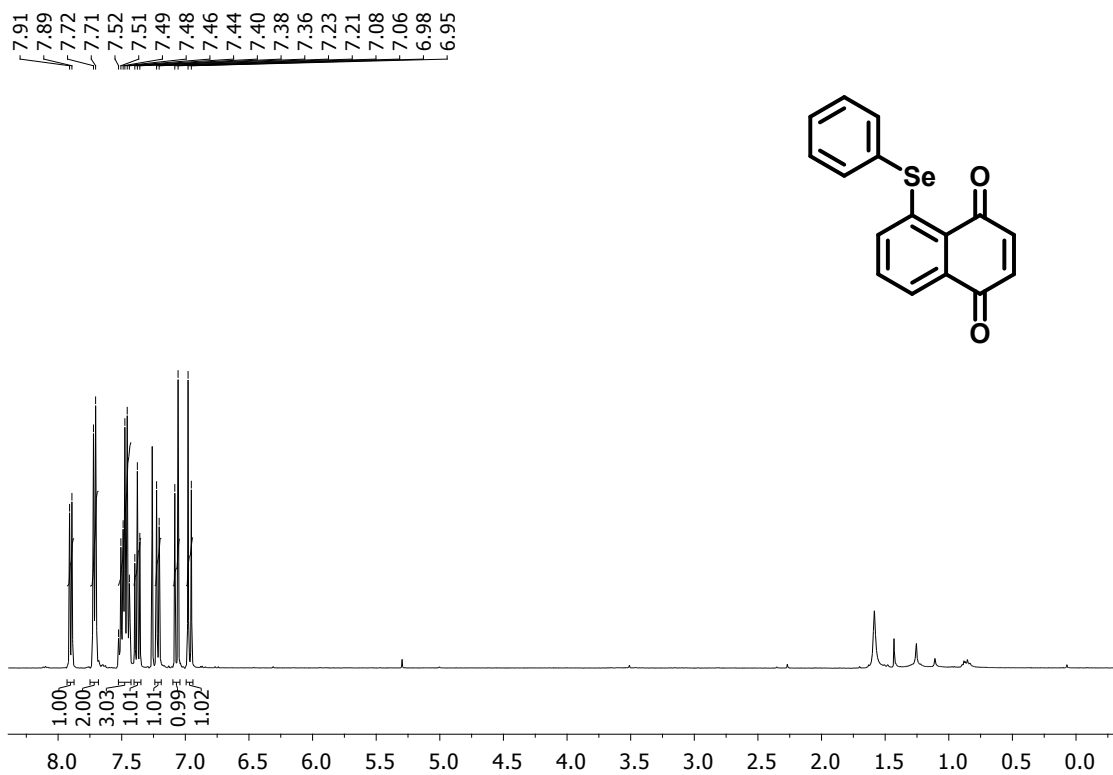

<sup>1</sup>H NMR spectrum (400 MHz, CDCl<sub>3</sub>) of compound 2a

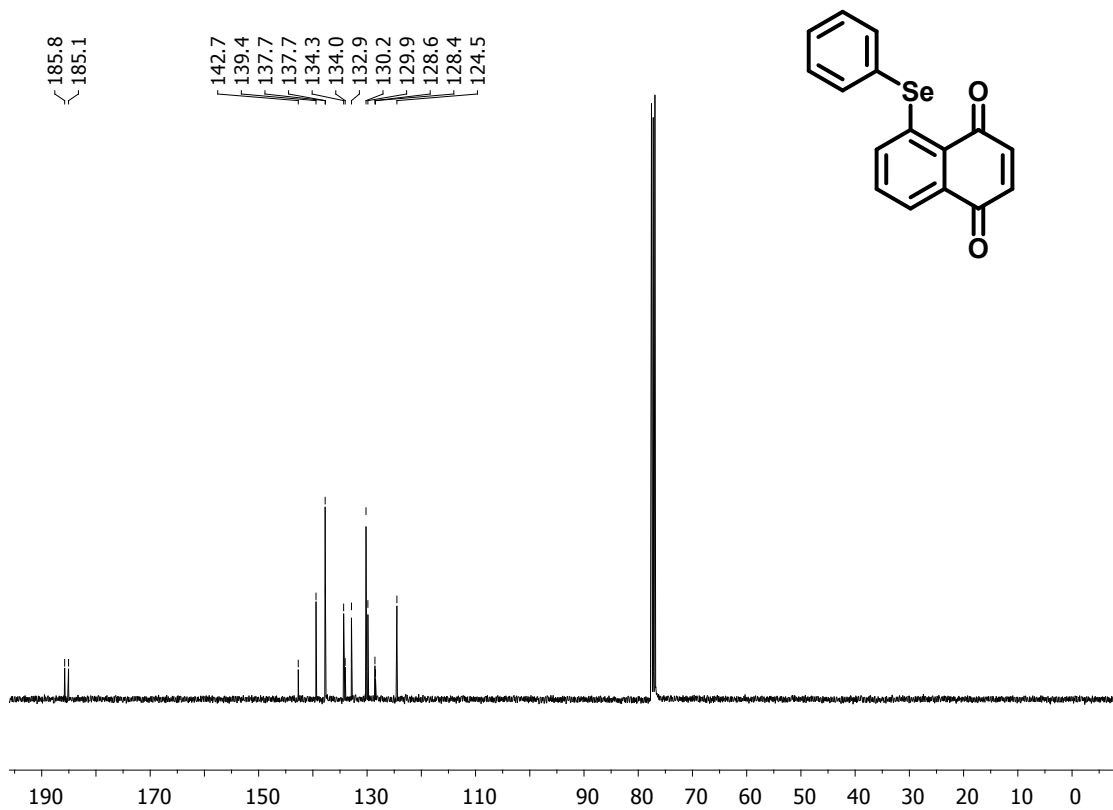

<sup>13</sup>C NMR spectrum (100 MHz, CDCl<sub>3</sub>) of compound 2a

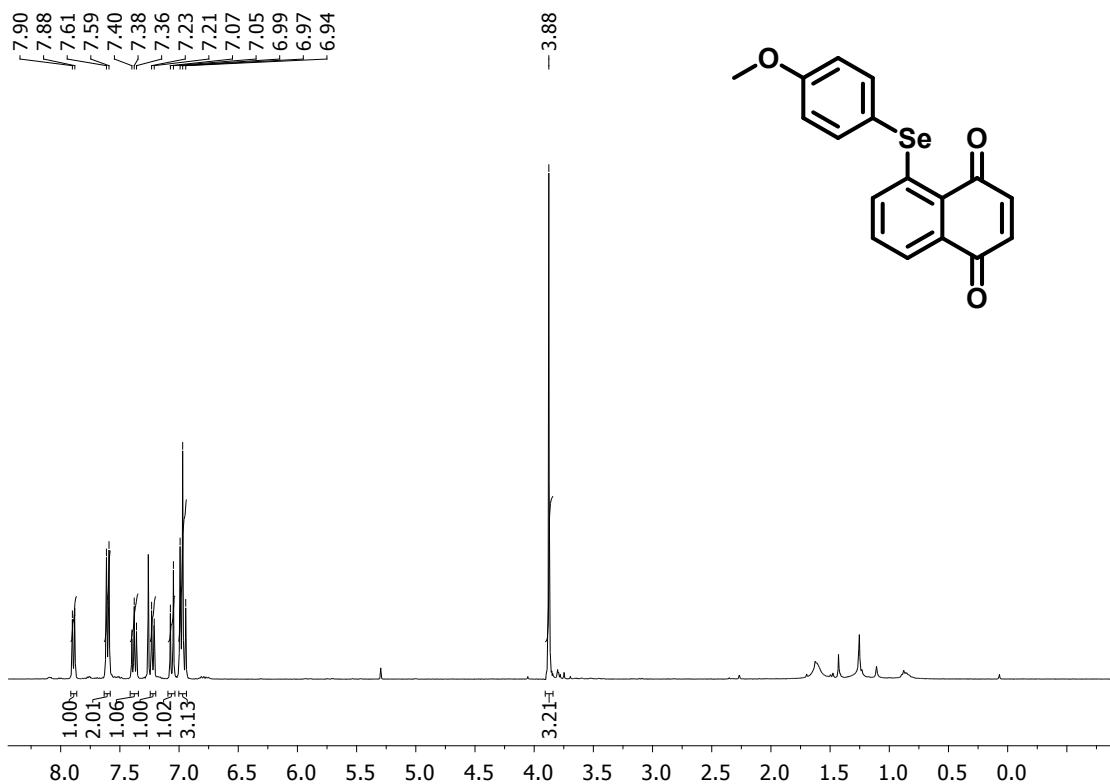

<sup>1</sup>H NMR spectrum (400 MHz, CDCl<sub>3</sub>) of compound **2b**

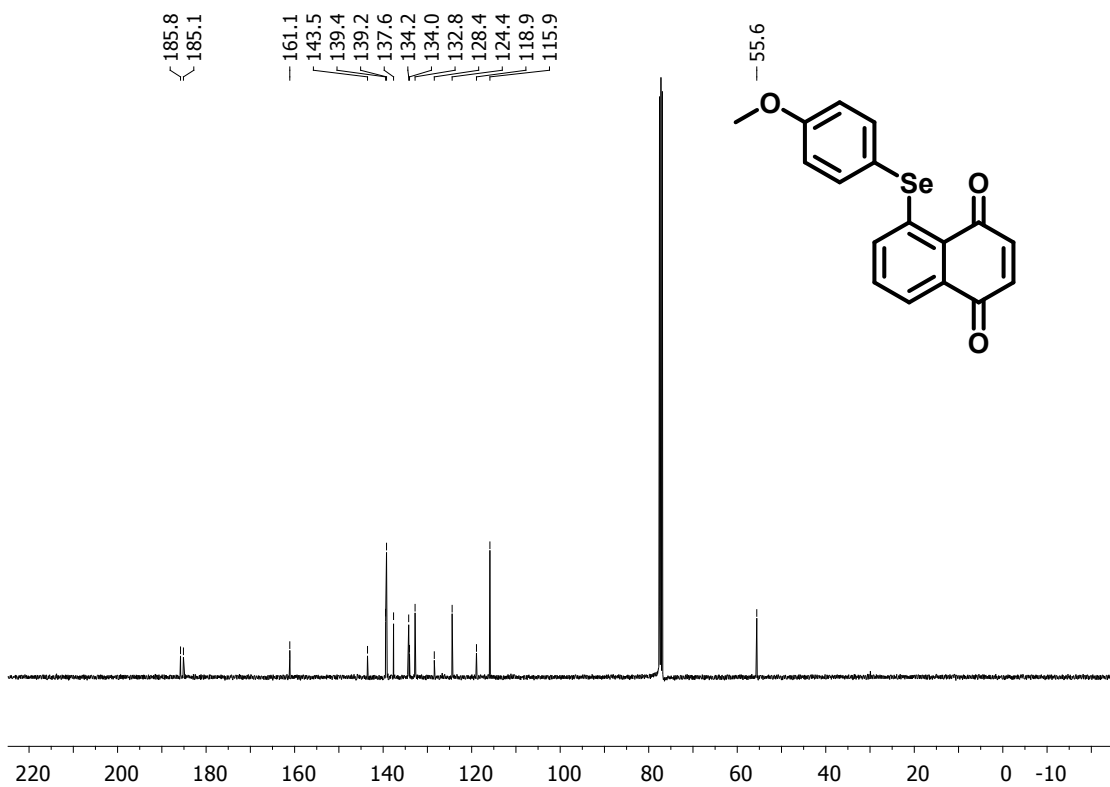

<sup>13</sup>C NMR spectrum (100 MHz, CDCl<sub>3</sub>) of compound **2b**

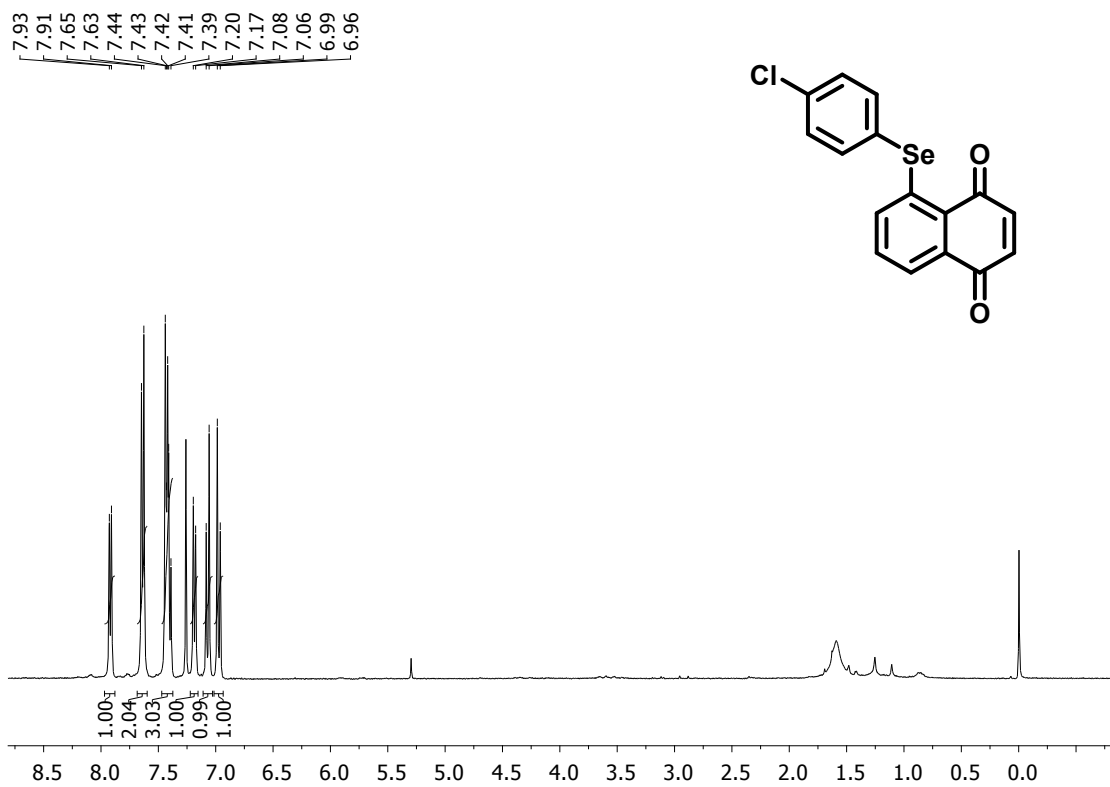

$^1\text{H NMR}$  spectrum (400 MHz,  $\text{CDCl}_3$ ) of compound **2c**

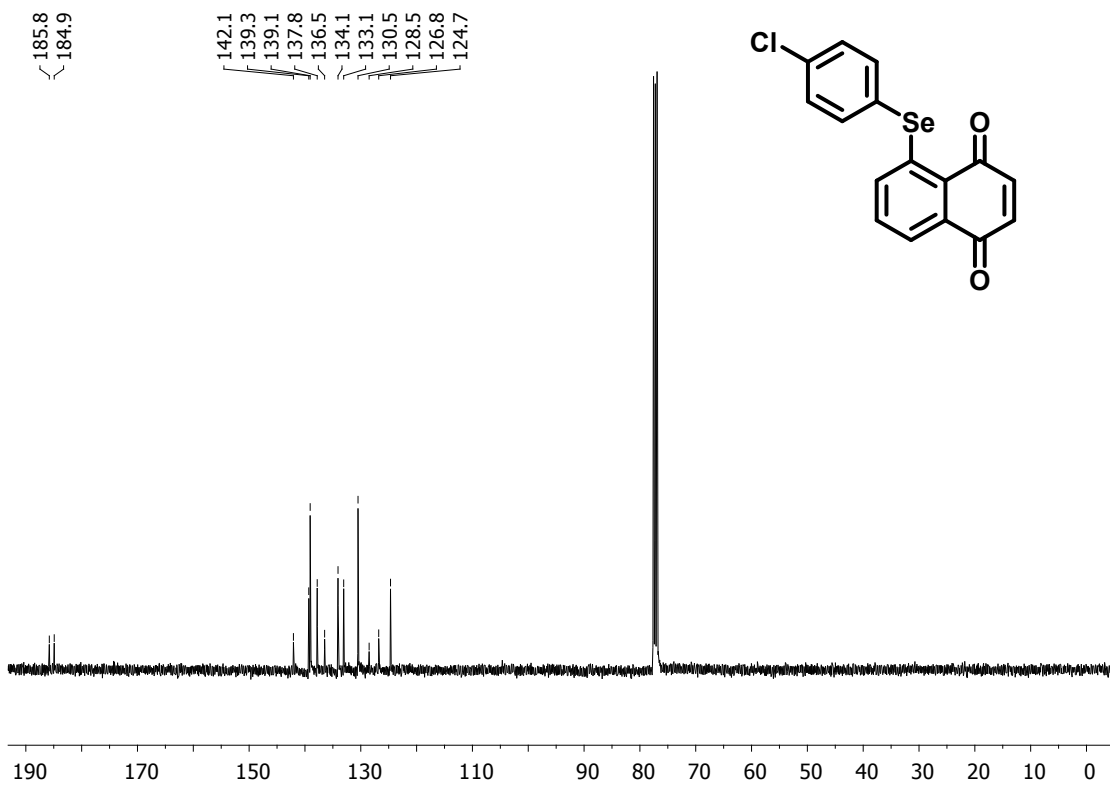

$^{13}\text{C NMR}$  spectrum (100 MHz,  $\text{CDCl}_3$ ) of compound **2c**

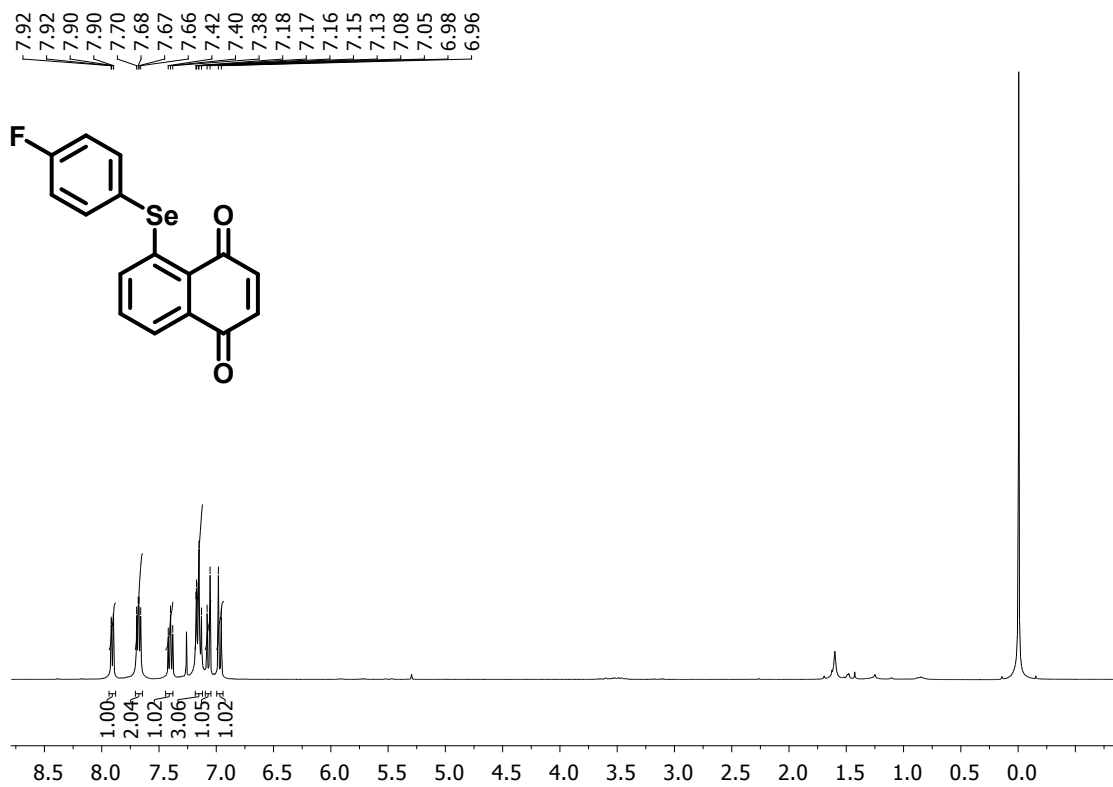

<sup>1</sup>H NMR spectrum (400 MHz, CDCl<sub>3</sub>) of compound **2d**

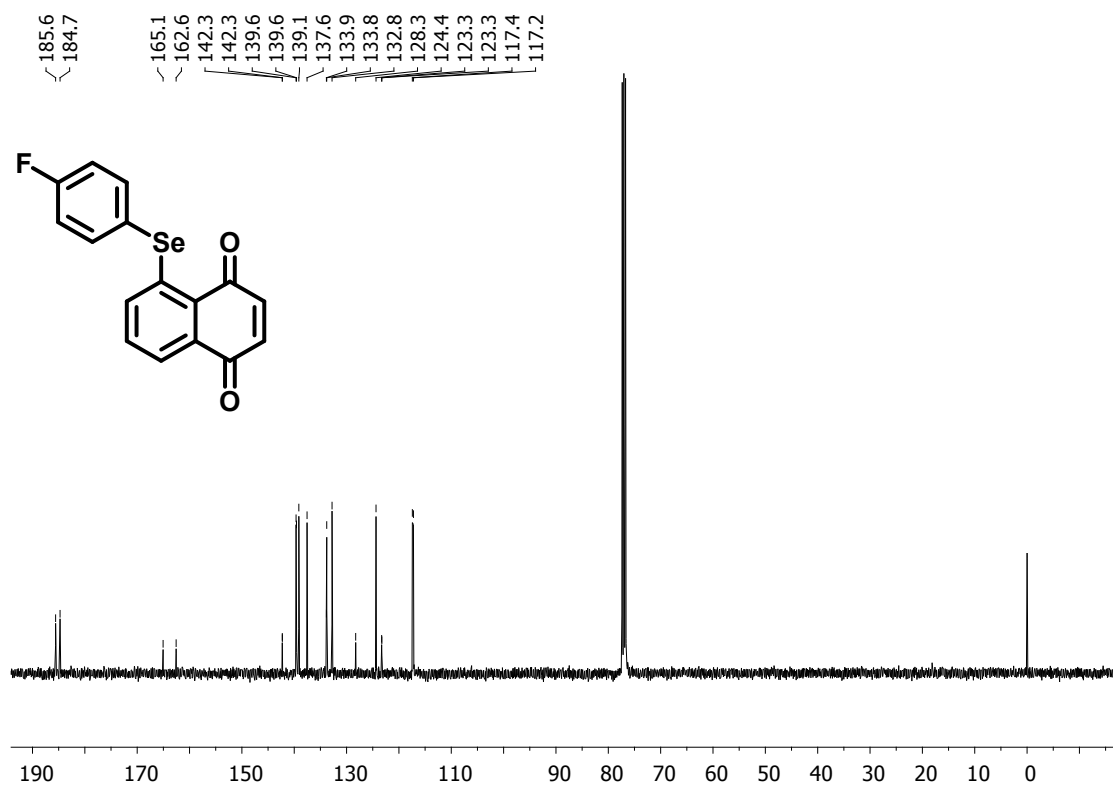

<sup>13</sup>C NMR spectrum (100 MHz, CDCl<sub>3</sub>) of compound **2d**

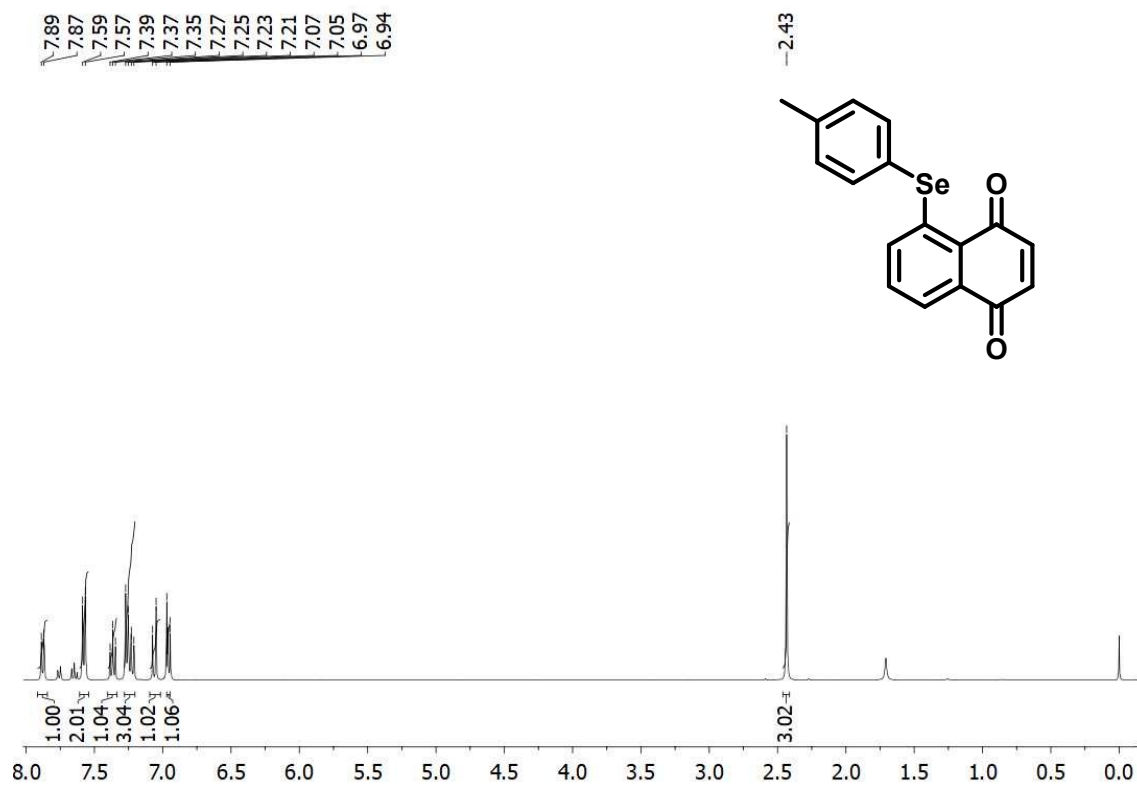

$^1\text{H}$  NMR spectrum (400 MHz,  $\text{CDCl}_3$ ) of compound **2e**

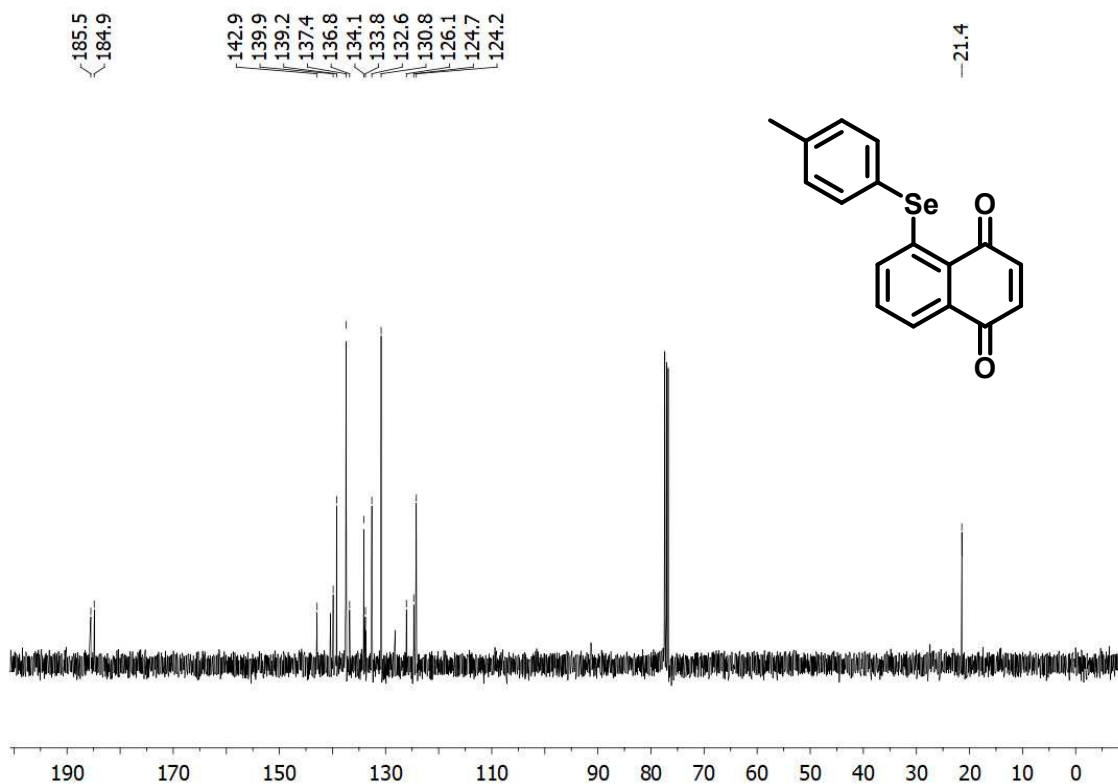

$^{13}\text{C}$  NMR spectrum (100 MHz,  $\text{CDCl}_3$ ) of compound **2e**



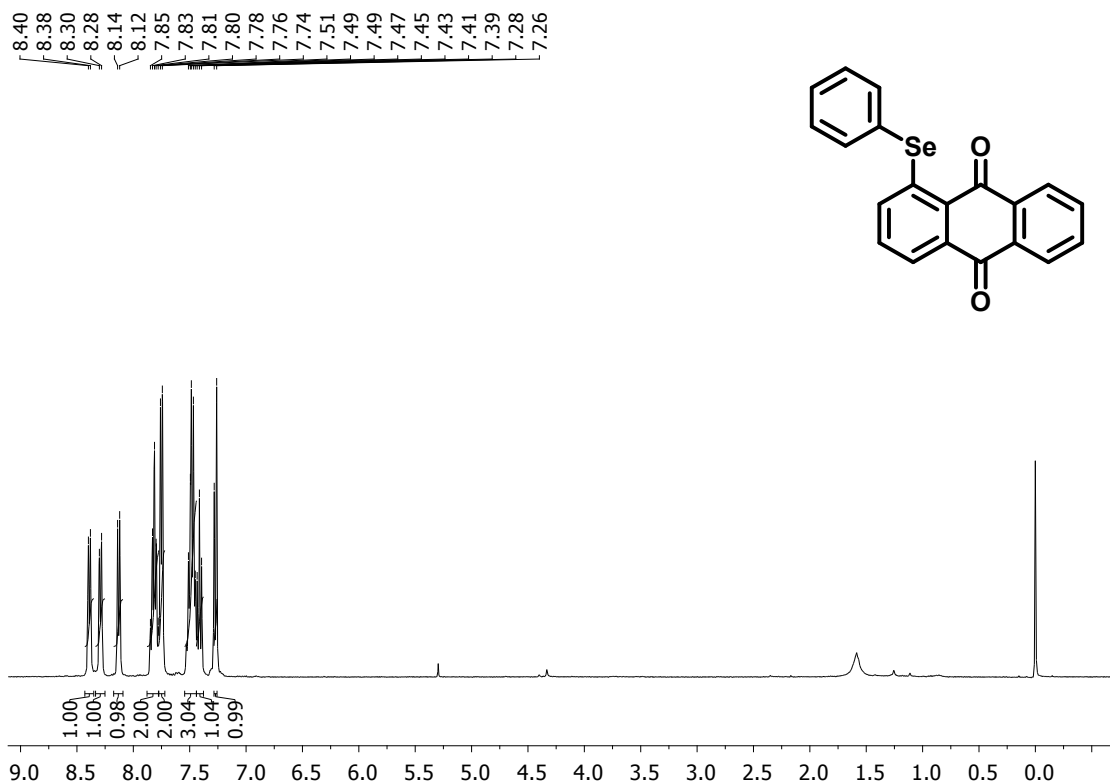

<sup>1</sup>H NMR spectrum (400 MHz, CDCl<sub>3</sub>) of compound **2f**

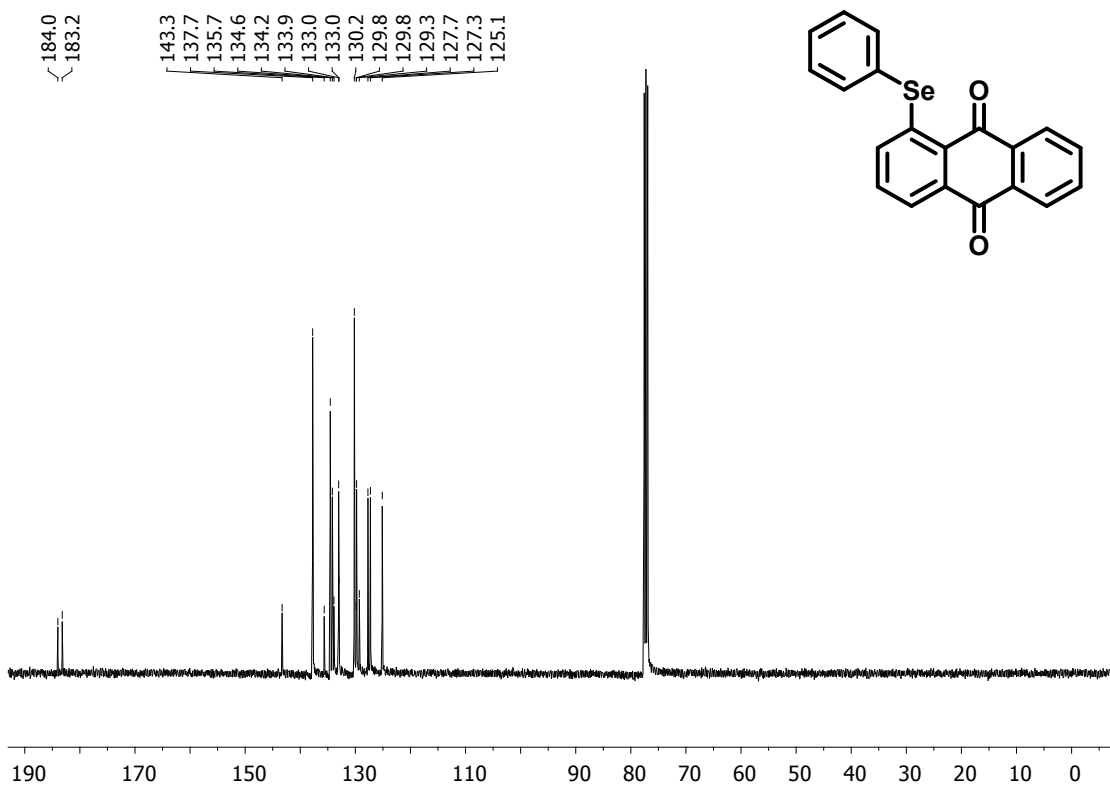

<sup>13</sup>C NMR spectrum (100 MHz, CDCl<sub>3</sub>) of compound **2f**

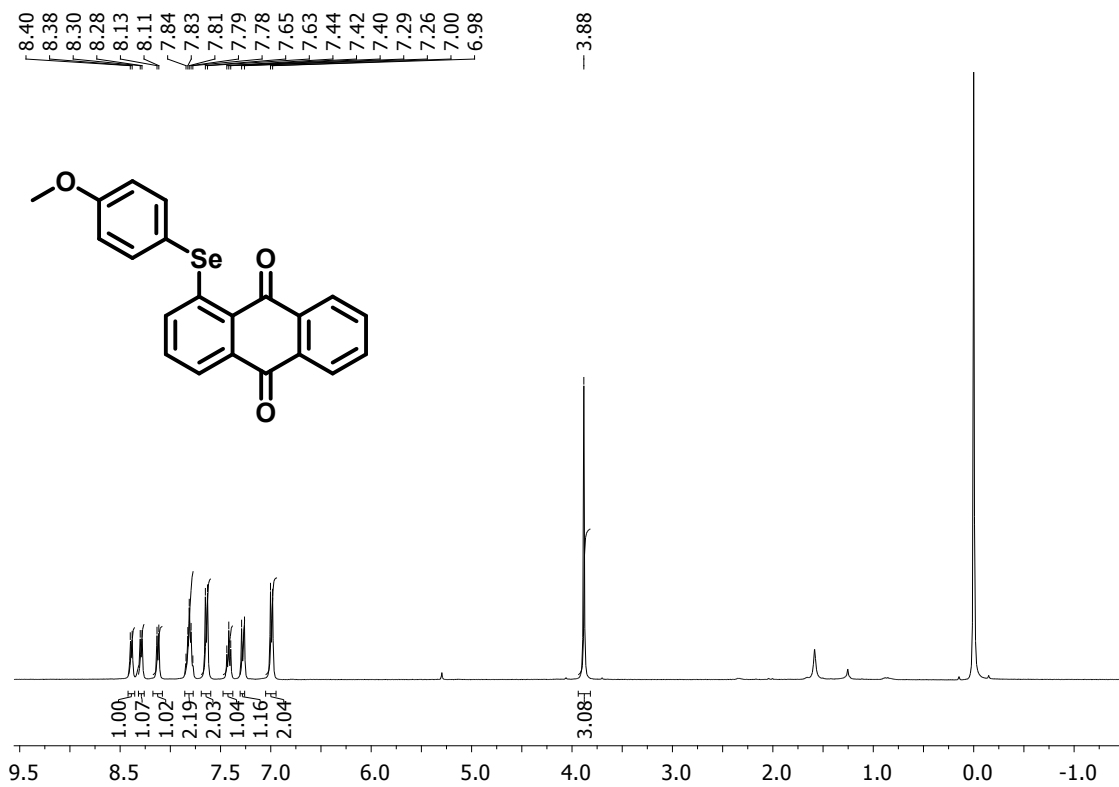

<sup>1</sup>H NMR spectrum (400 MHz, CDCl<sub>3</sub>) of compound **2g**

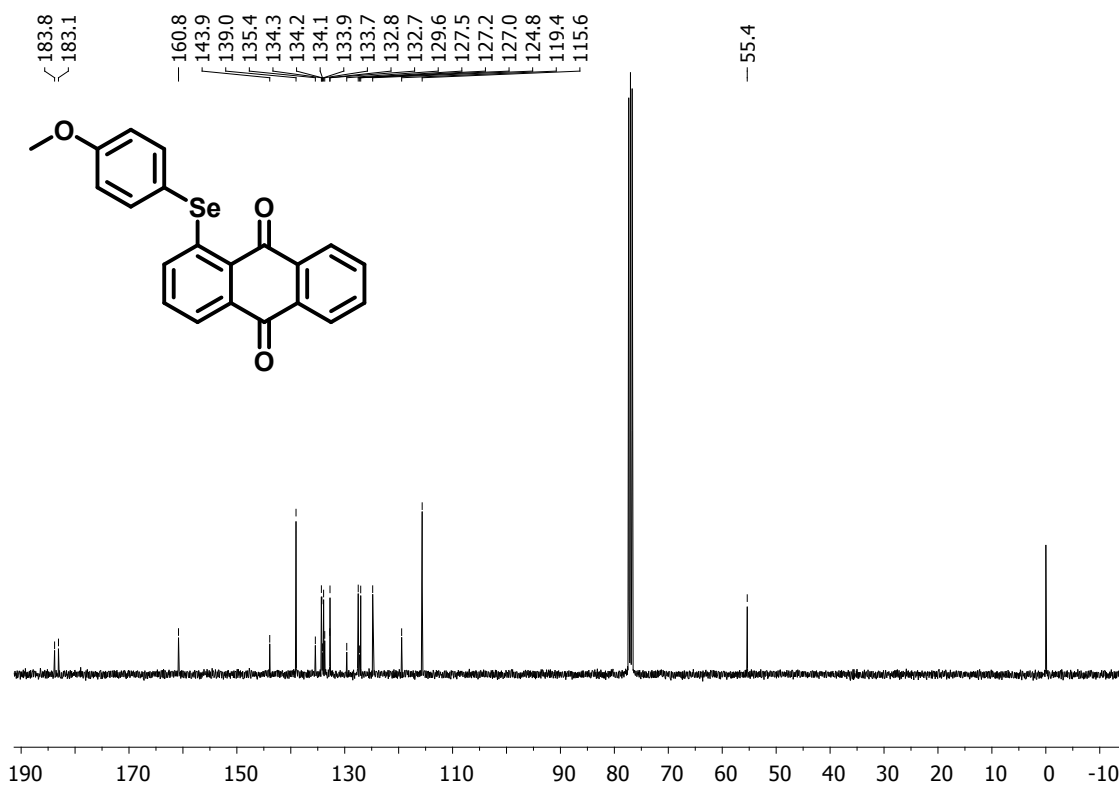

<sup>13</sup>C NMR spectrum (100 MHz, CDCl<sub>3</sub>) of compound **2g**

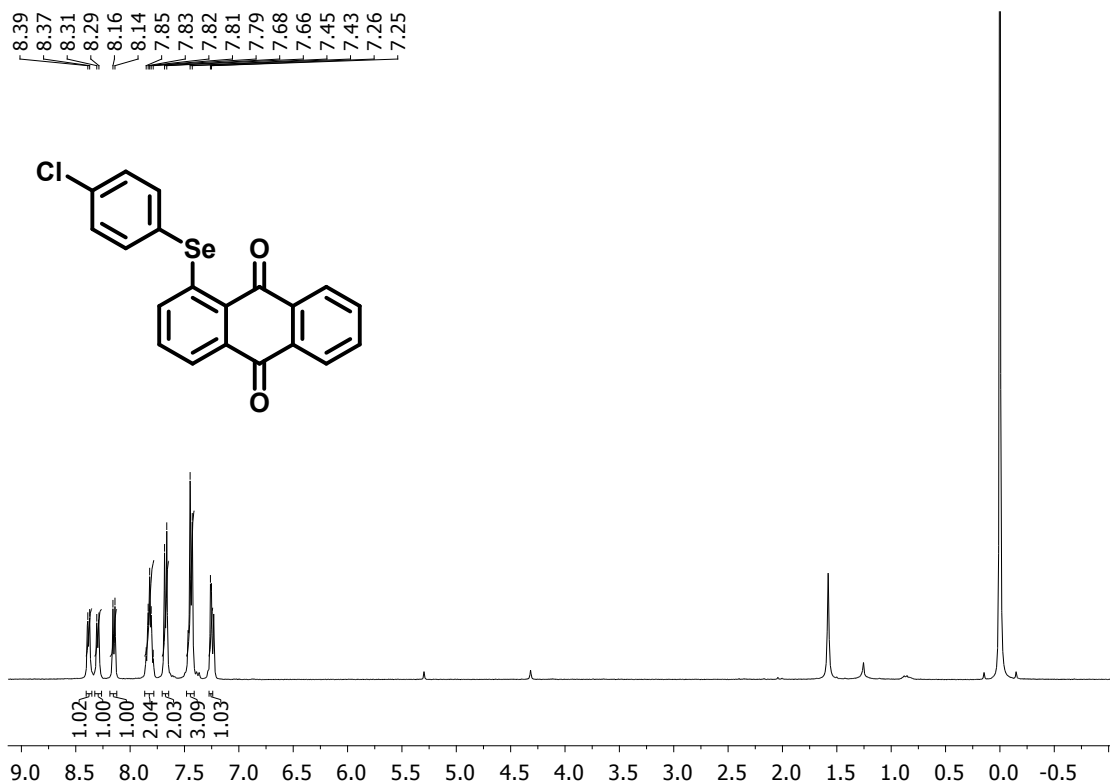

<sup>1</sup>H NMR spectrum (400 MHz, CDCl<sub>3</sub>) of compound **2h**

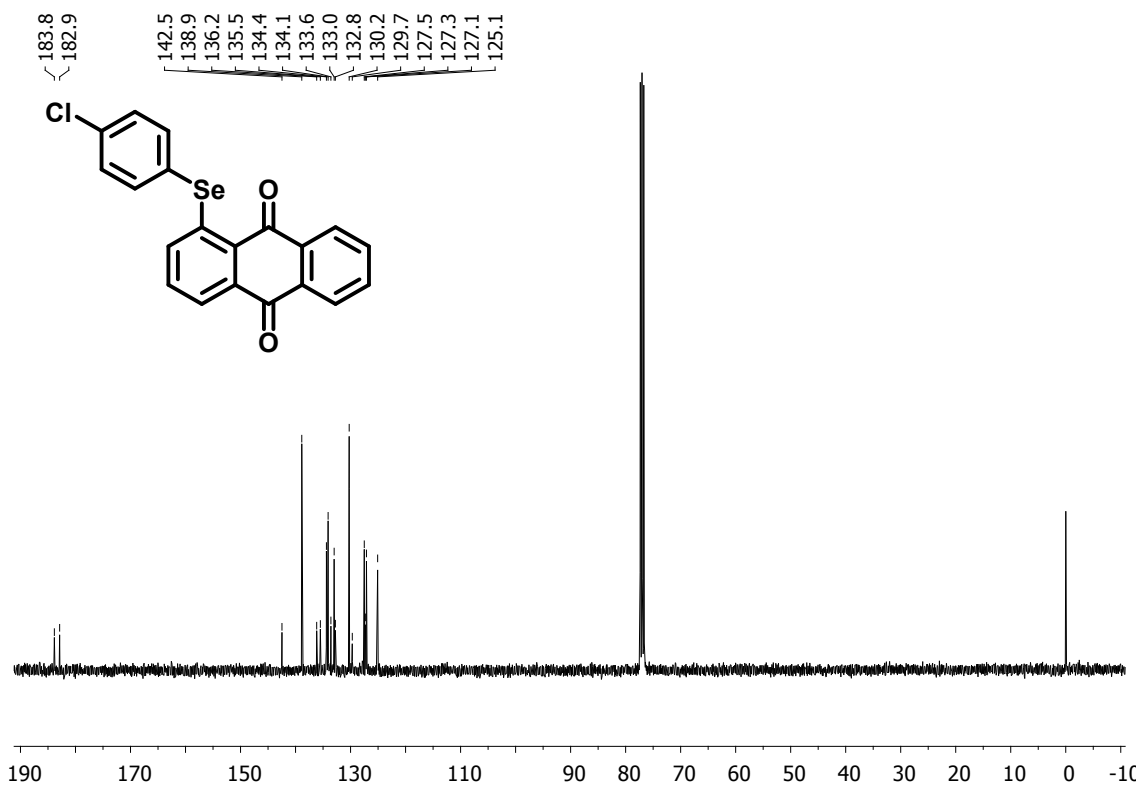

<sup>13</sup>C NMR spectrum (100 MHz, CDCl<sub>3</sub>) of compound **2h**

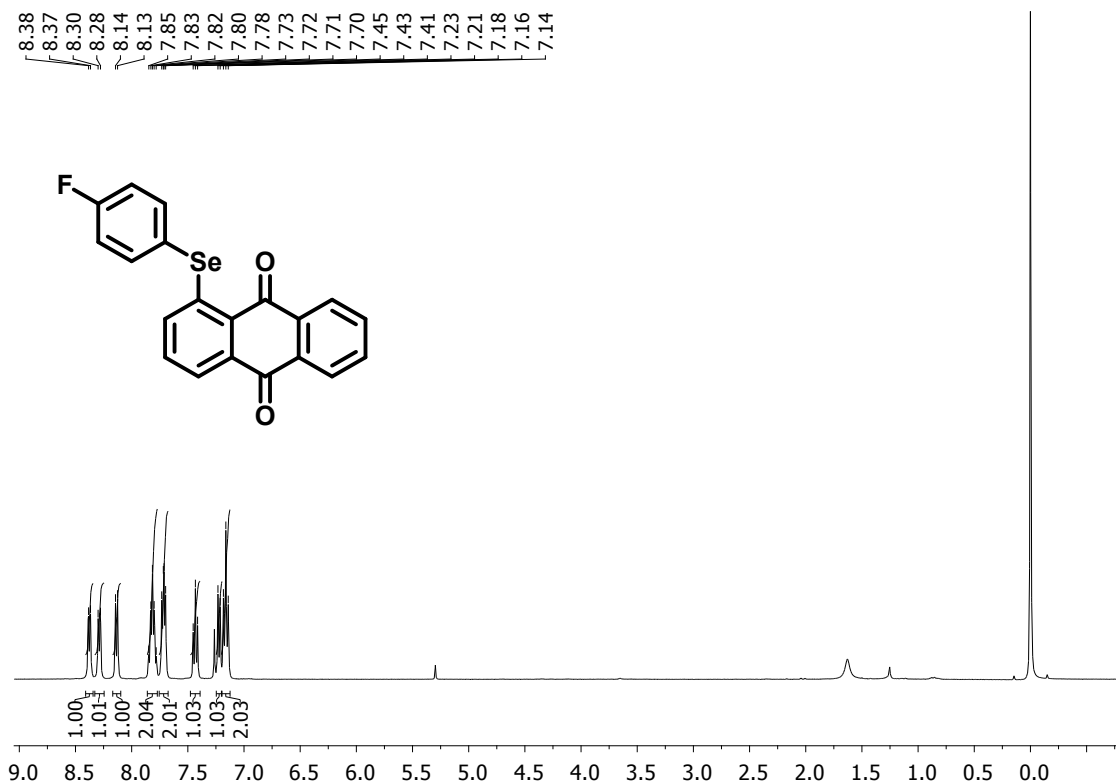

<sup>1</sup>H NMR spectrum (400 MHz, CDCl<sub>3</sub>) of compound **2i**

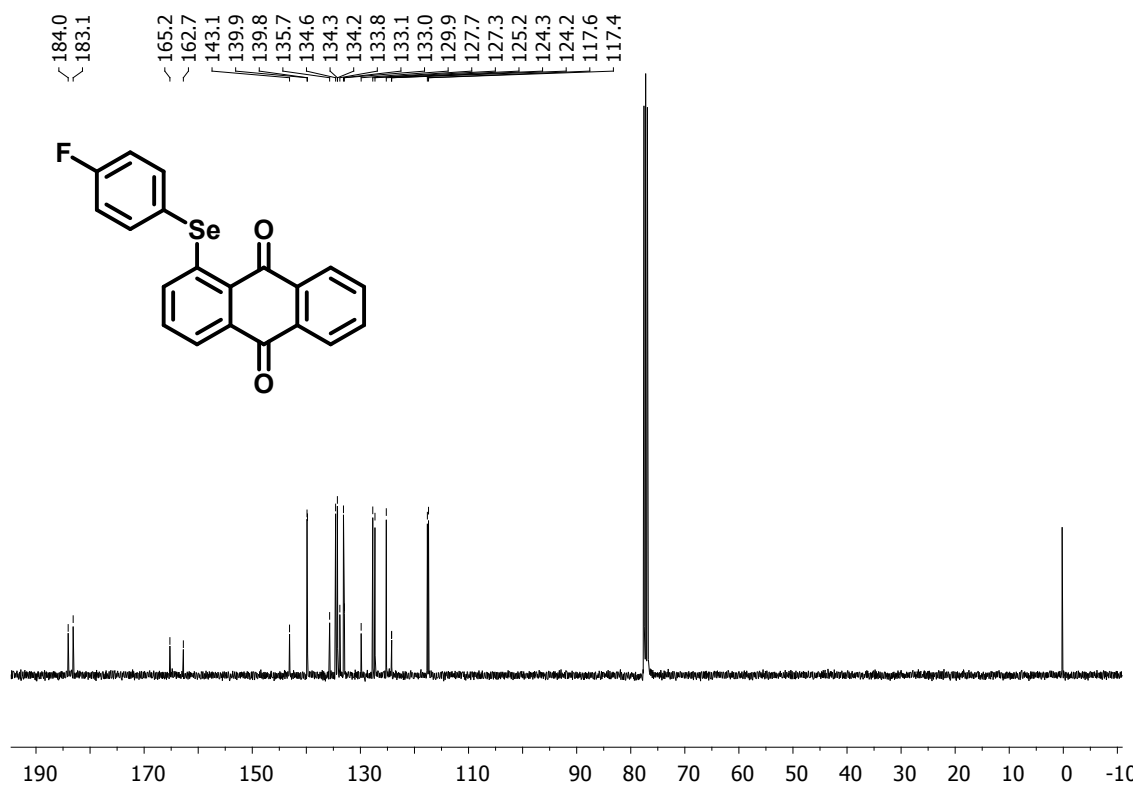

<sup>13</sup>C NMR spectrum (100 MHz, CDCl<sub>3</sub>) of compound **2i**

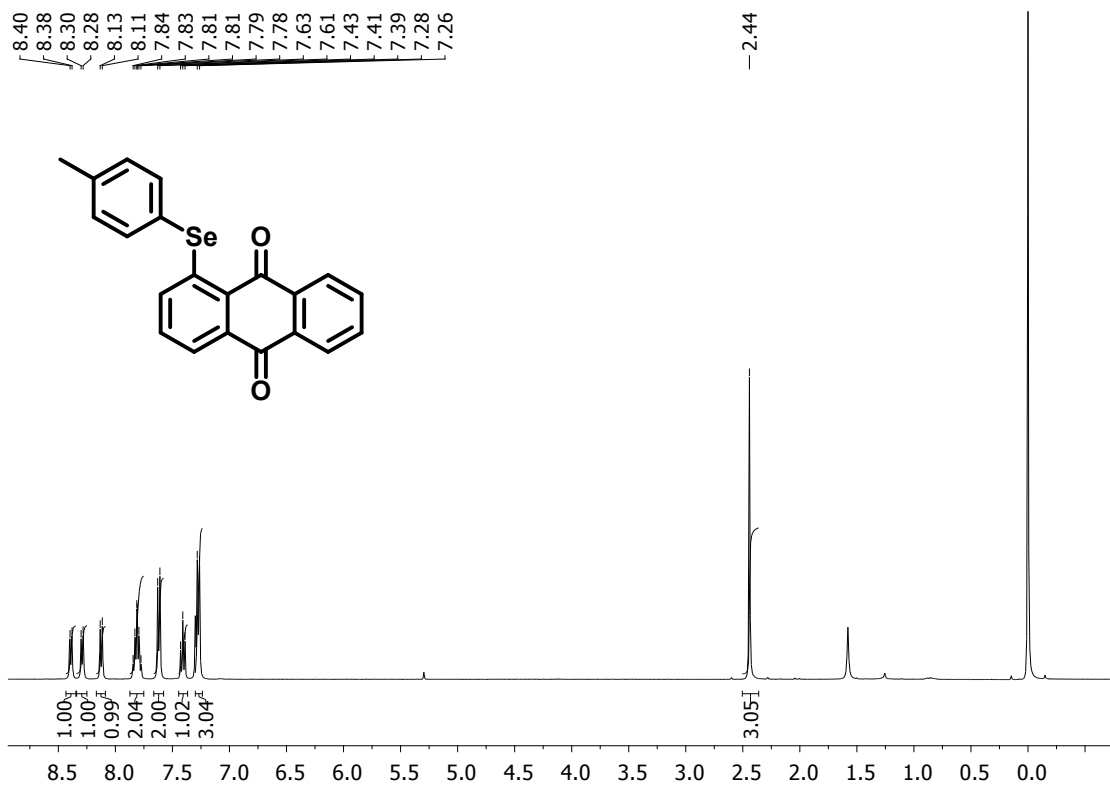

<sup>1</sup>H NMR spectrum (400 MHz, CDCl<sub>3</sub>) of compound **2j**

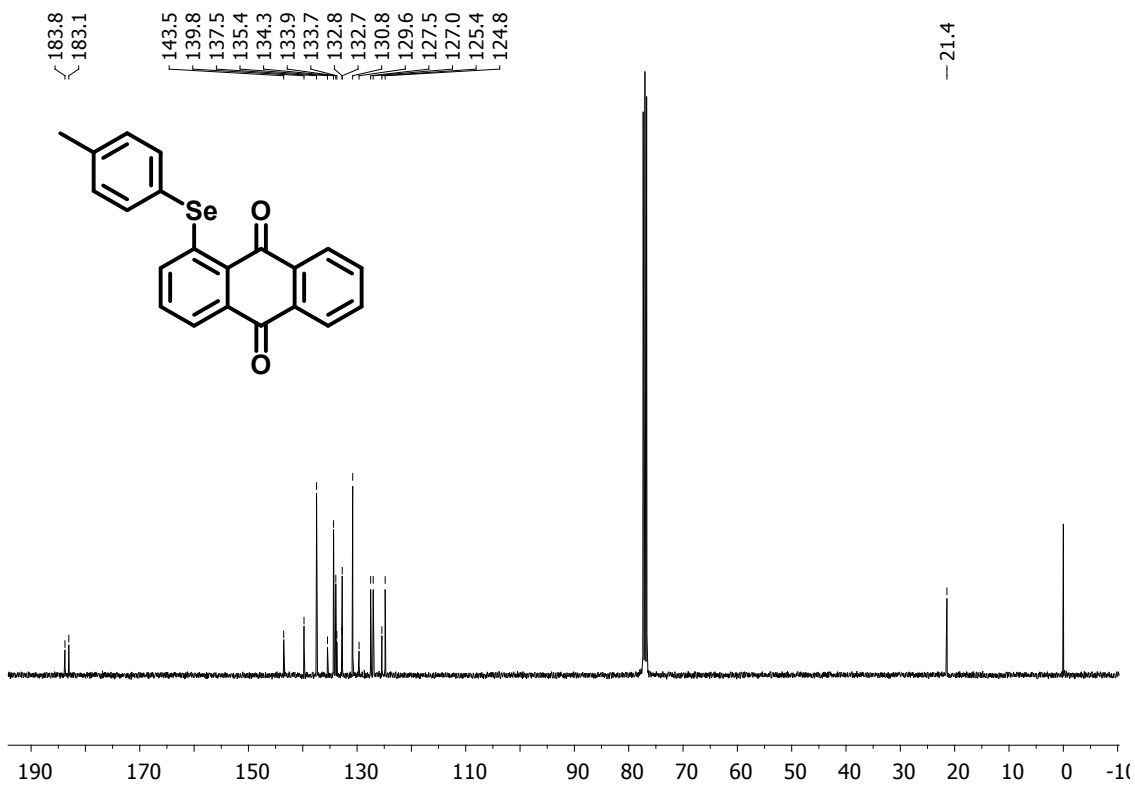

<sup>13</sup>C NMR spectrum (100 MHz, CDCl<sub>3</sub>) of compound **2j**

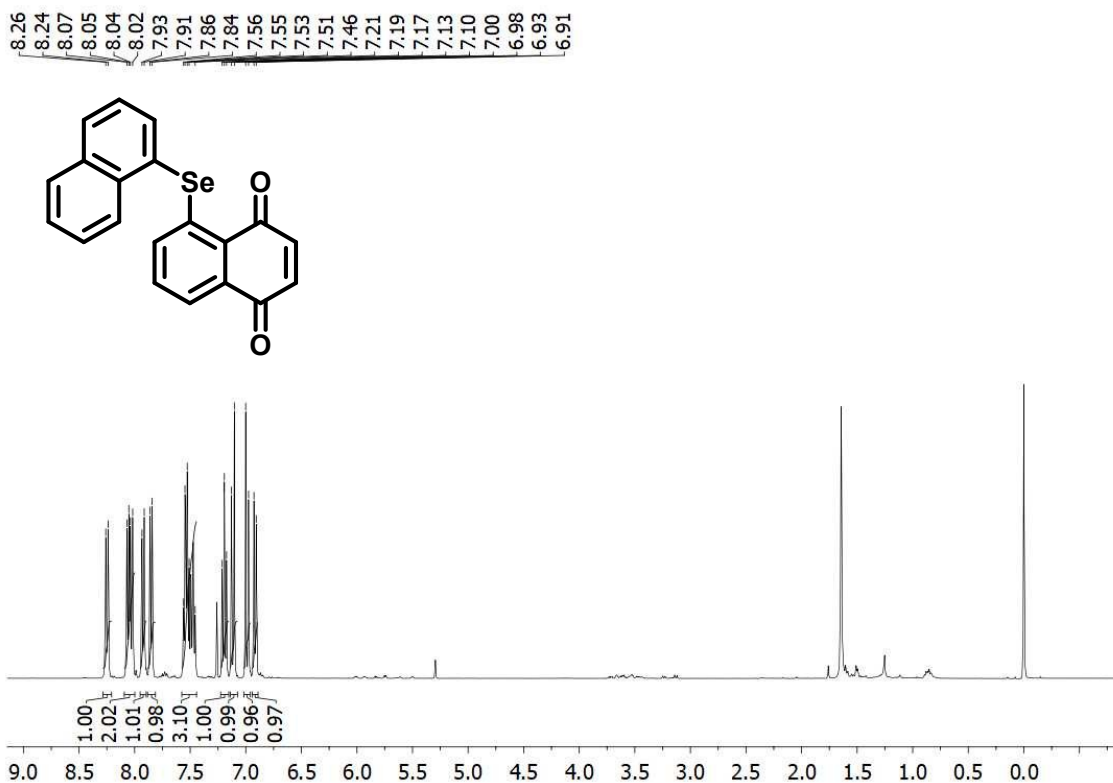

<sup>1</sup>H NMR spectrum (400 MHz, CDCl<sub>3</sub>) of compound **2k**

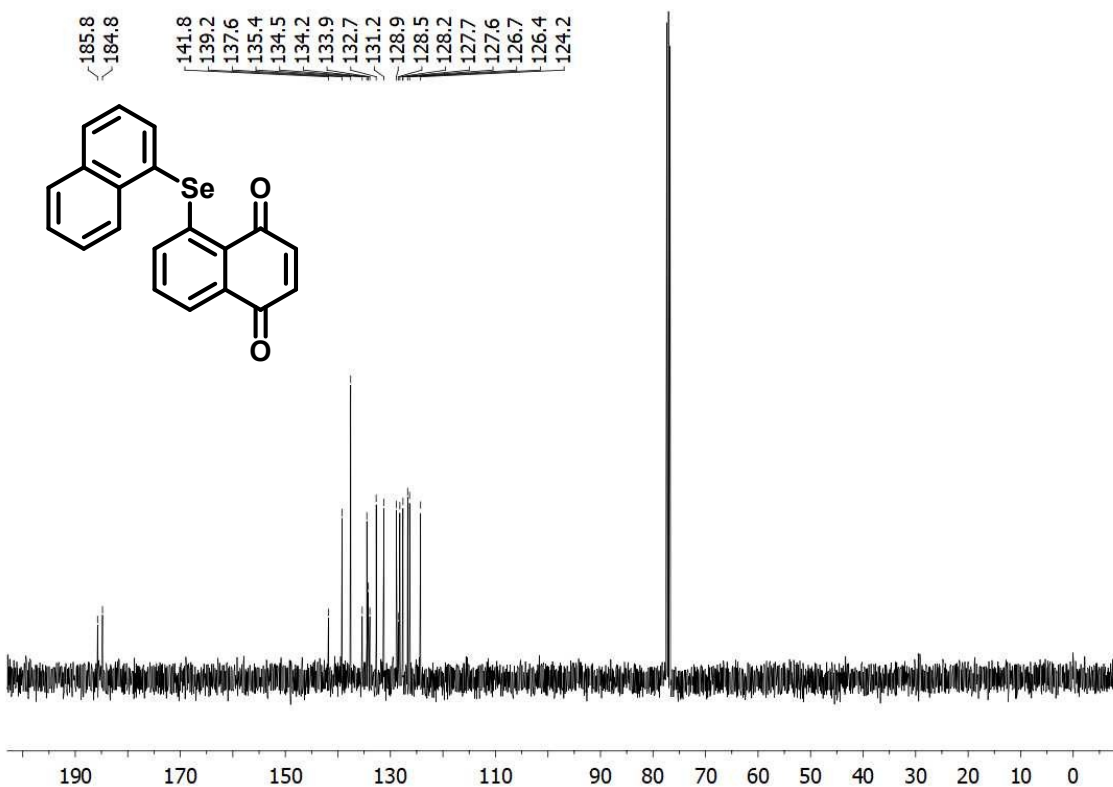

<sup>13</sup>C NMR spectrum (100 MHz, CDCl<sub>3</sub>) of compound **2k**

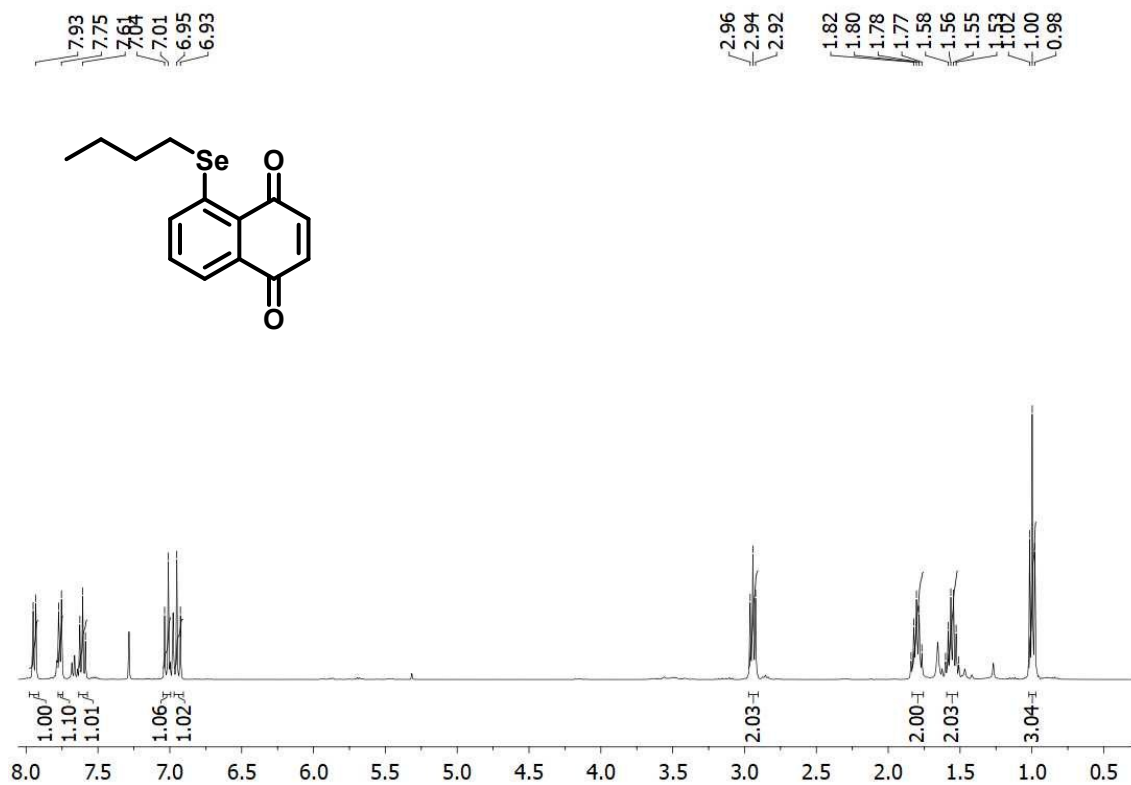

<sup>1</sup>H NMR spectrum (400 MHz, CDCl<sub>3</sub>) of compound **2l**

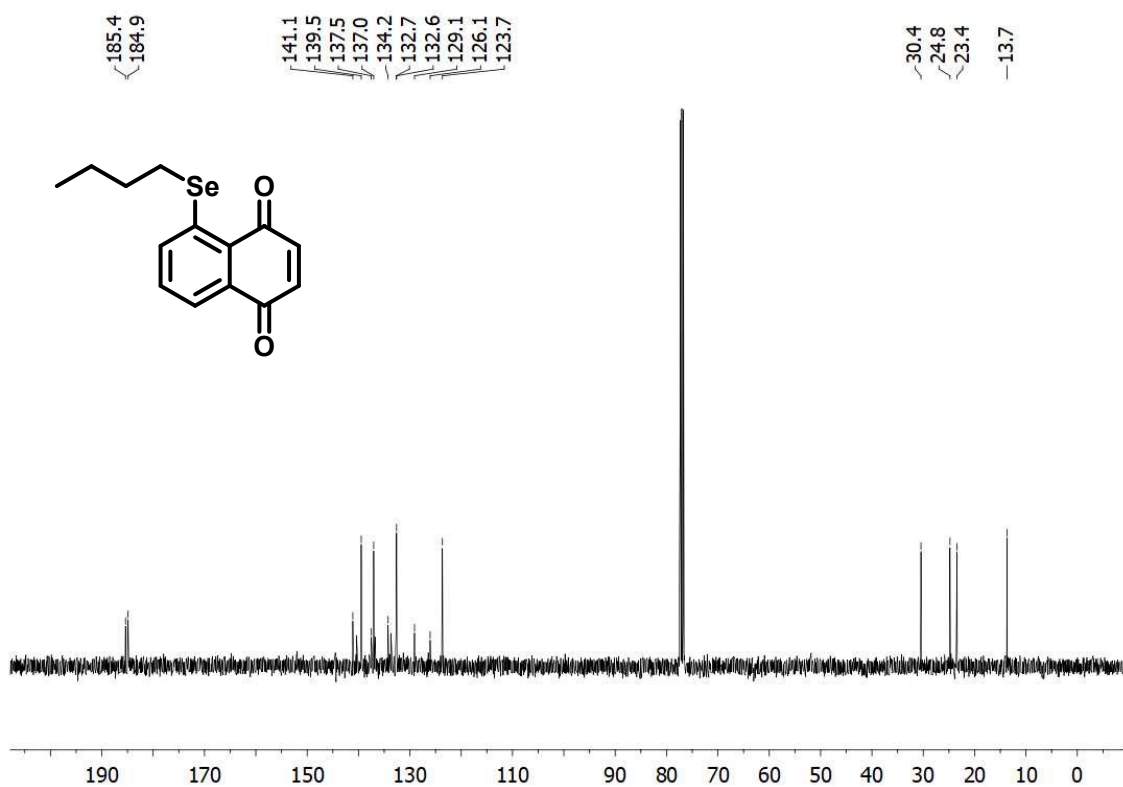

<sup>13</sup>C NMR spectrum (100 MHz, CDCl<sub>3</sub>) of compound **2l**

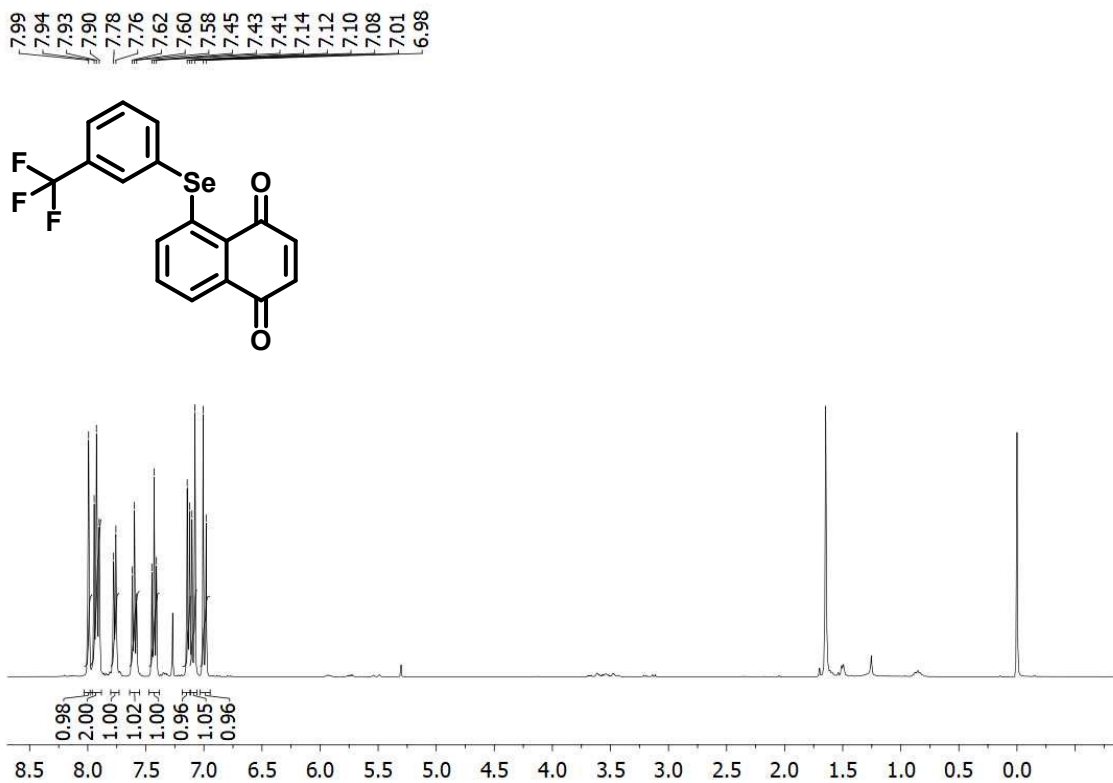

<sup>1</sup>H NMR spectrum (400 MHz, CDCl<sub>3</sub>) of compound **2m**

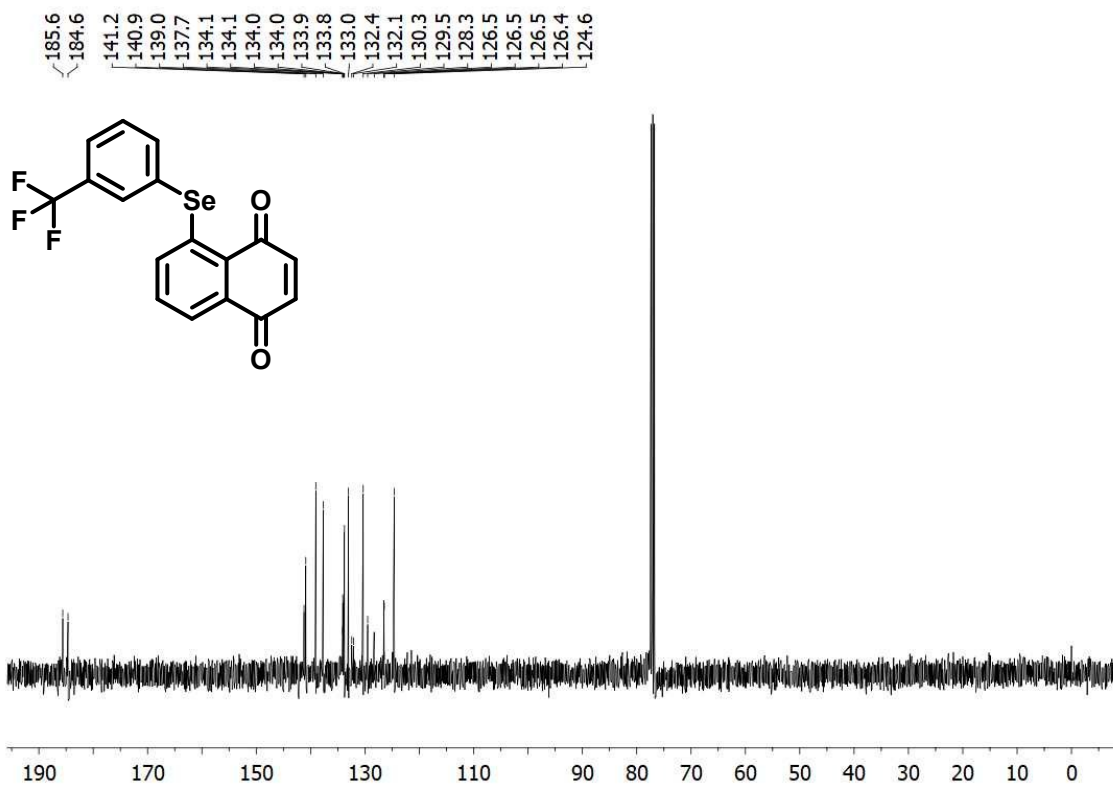

<sup>13</sup>C NMR spectrum (100 MHz, CDCl<sub>3</sub>) of compound **2m**



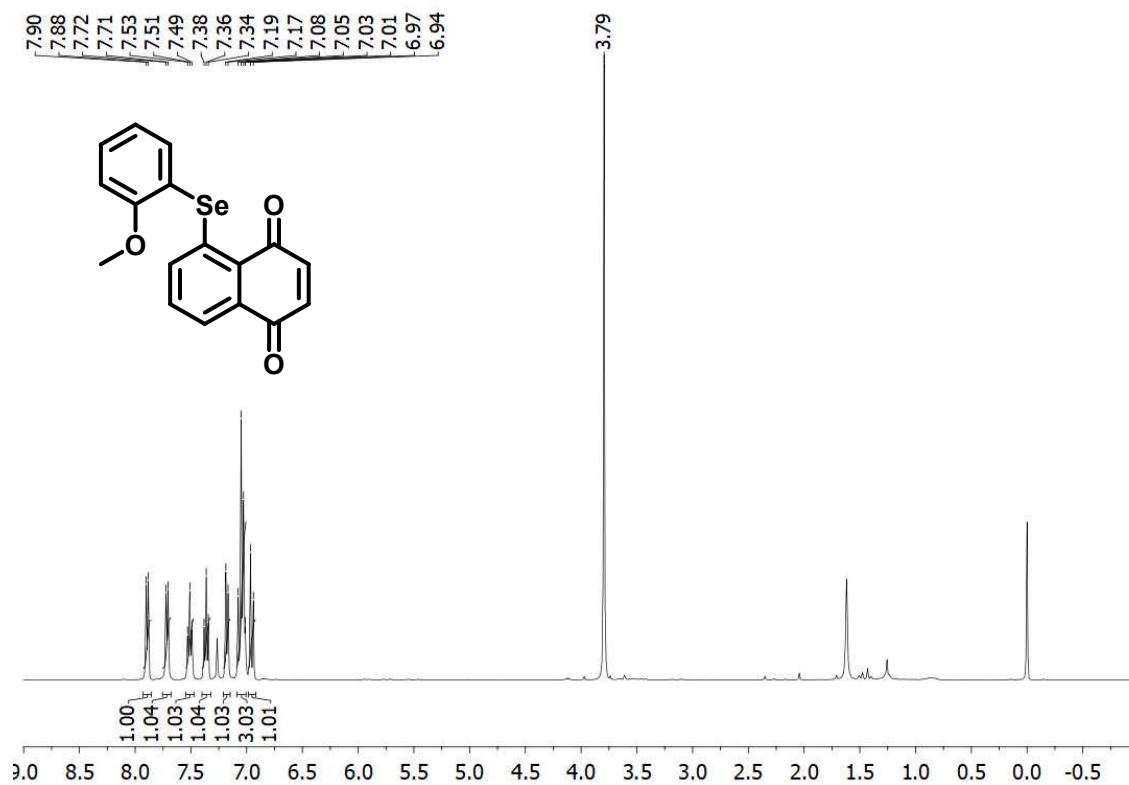

<sup>1</sup>H NMR spectrum (400 MHz, CDCl<sub>3</sub>) of compound **2n**

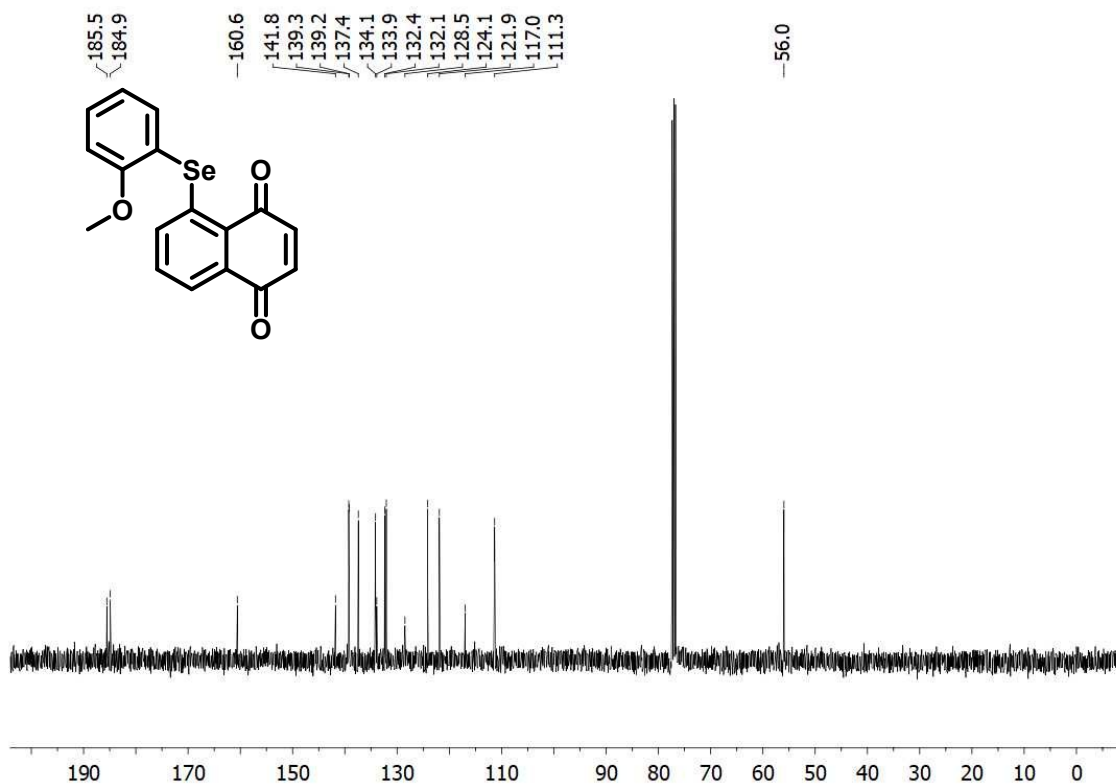

<sup>13</sup>C NMR spectrum (100 MHz, CDCl<sub>3</sub>) of compound **2n**

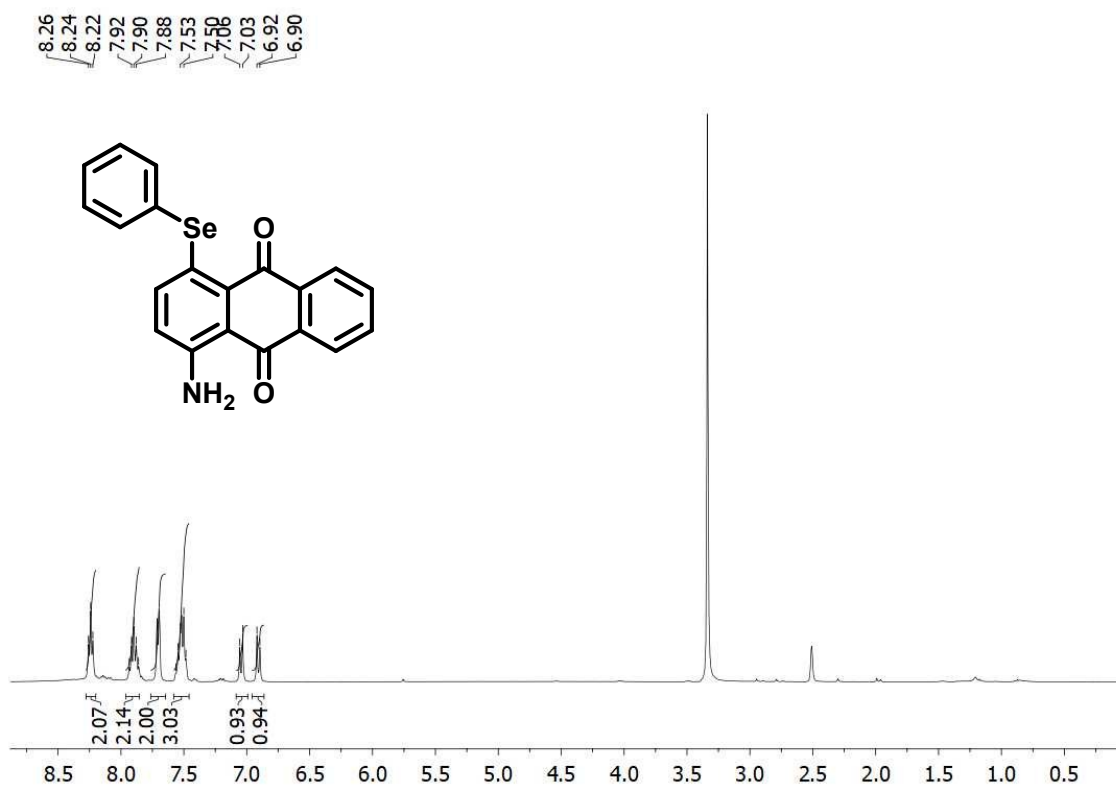

<sup>1</sup>H NMR spectrum (400 MHz, DMSO-*d*<sub>6</sub>) of compound **2o**

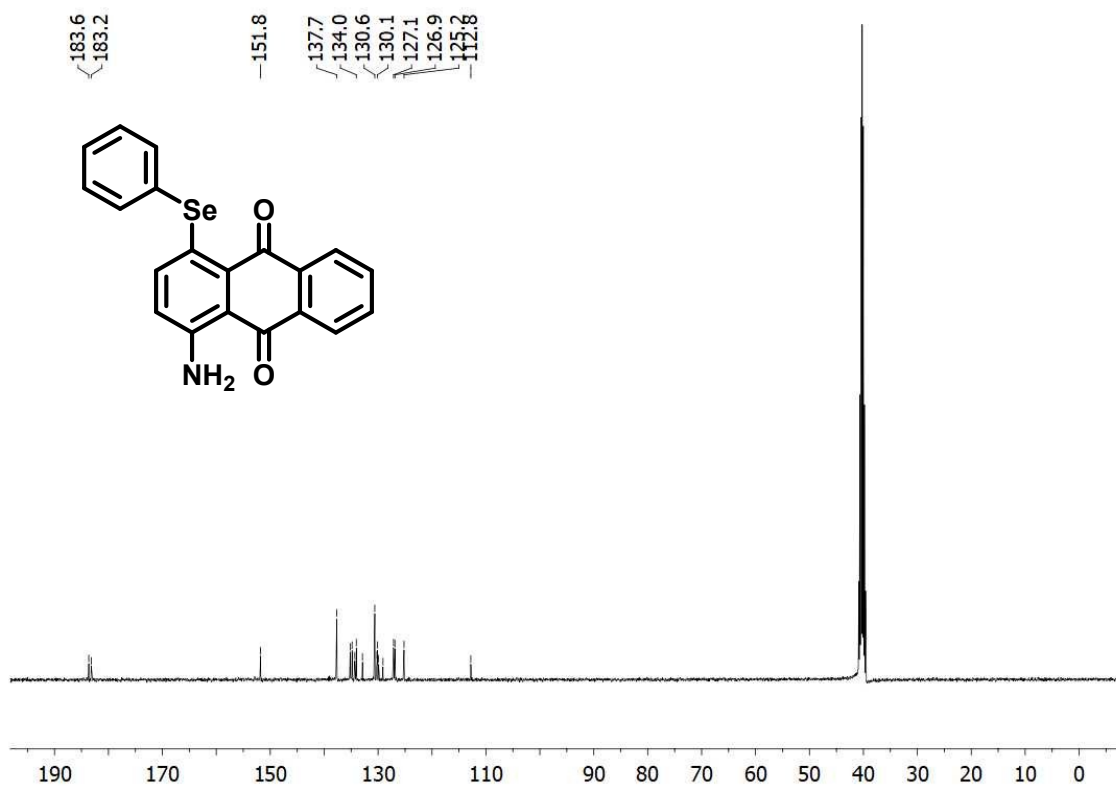

<sup>13</sup>C NMR spectrum (100 MHz, DMSO-*d*<sub>6</sub>) of compound **2o**

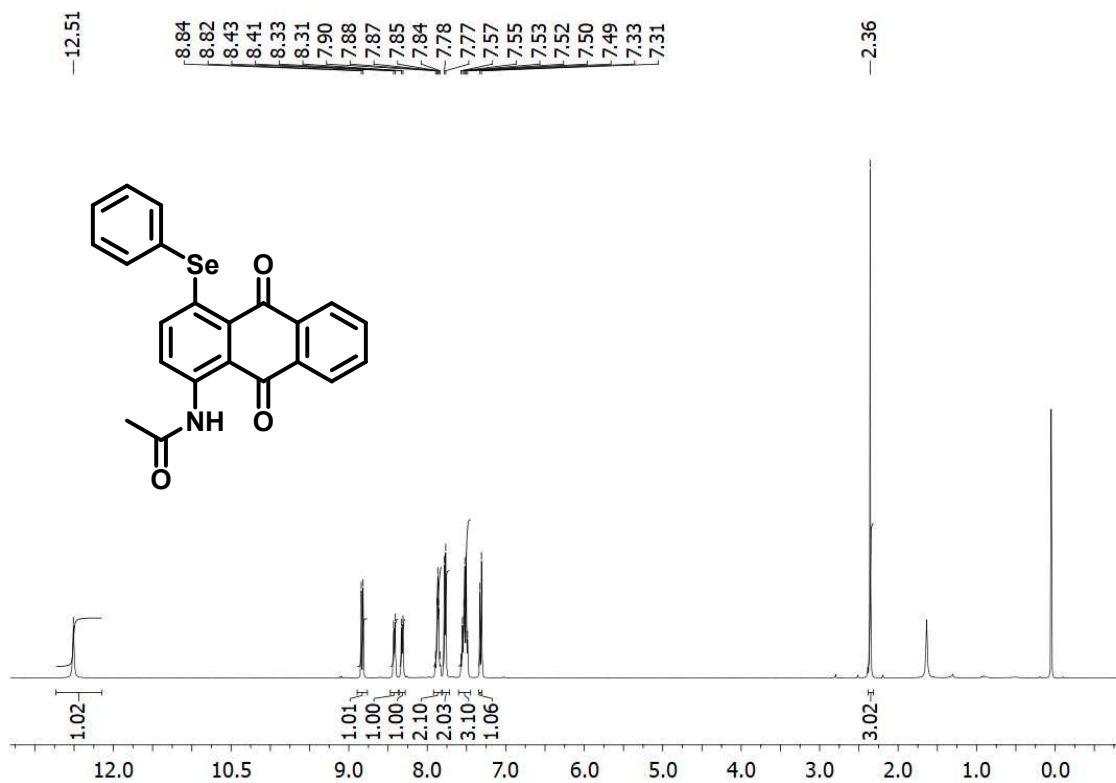

<sup>1</sup>H NMR spectrum (400 MHz, CDCl<sub>3</sub>) of compound **2p**

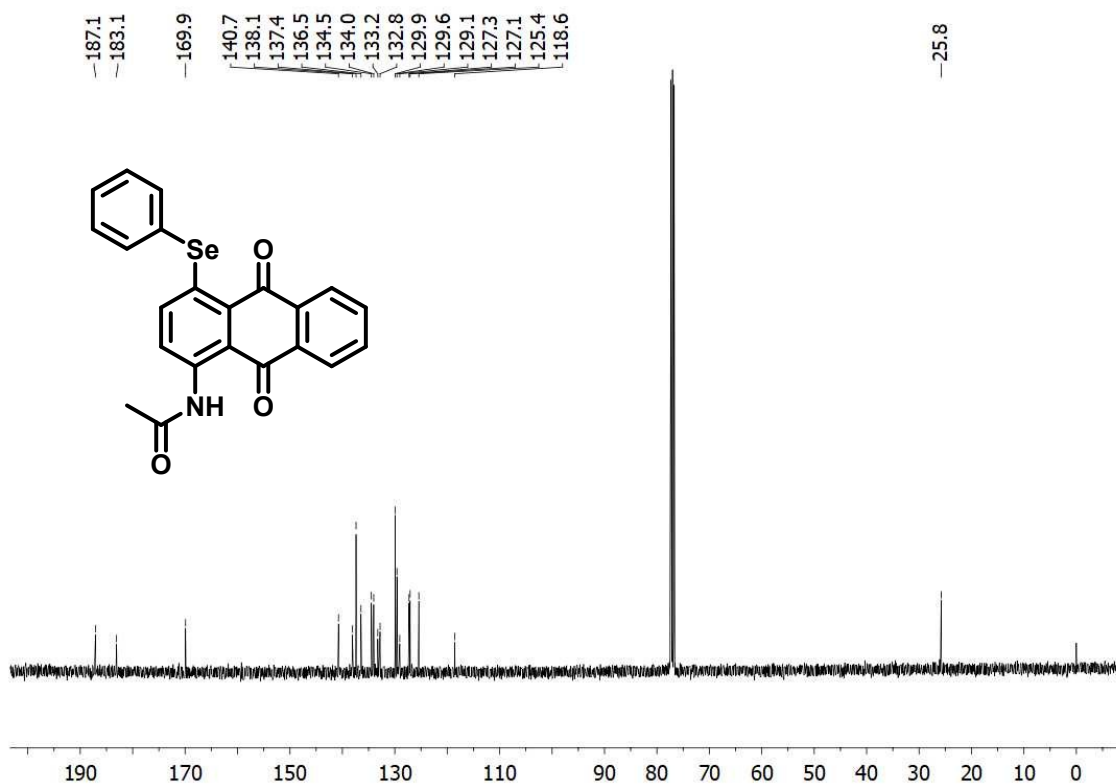

<sup>13</sup>C NMR spectrum (100 MHz, CDCl<sub>3</sub>) of compound **2p**

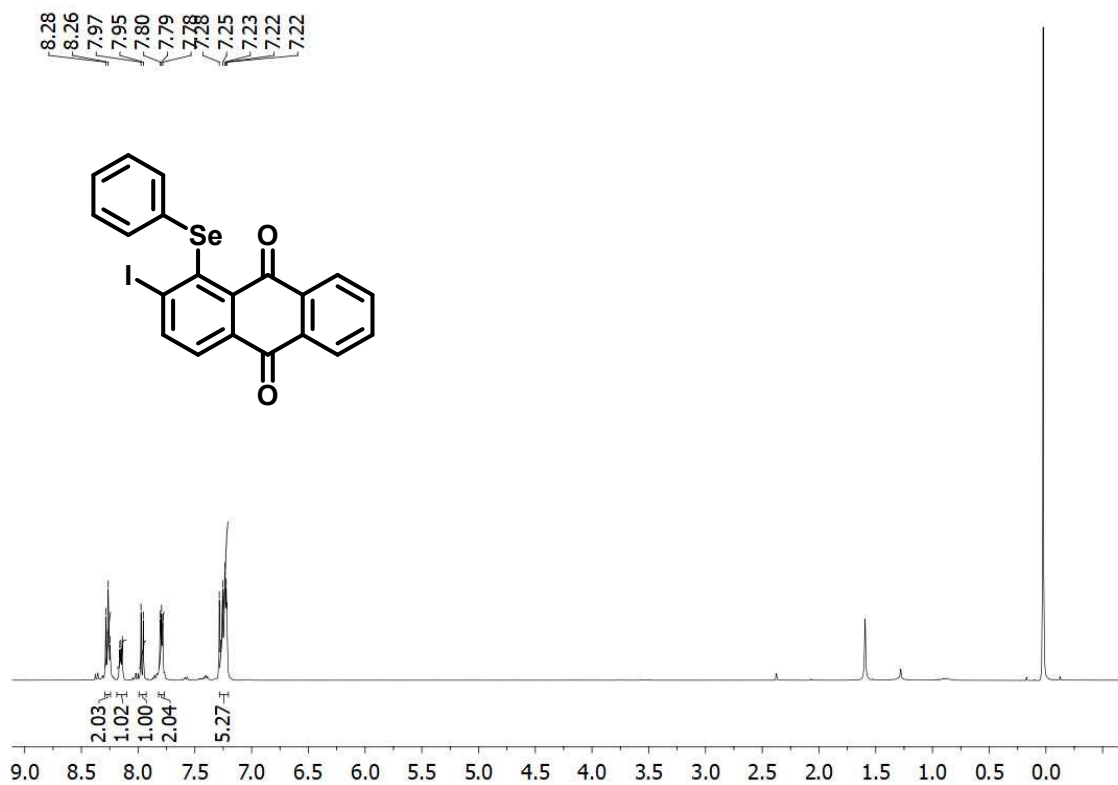

<sup>1</sup>H NMR spectrum (400 MHz, CDCl<sub>3</sub>) of compound **2q**

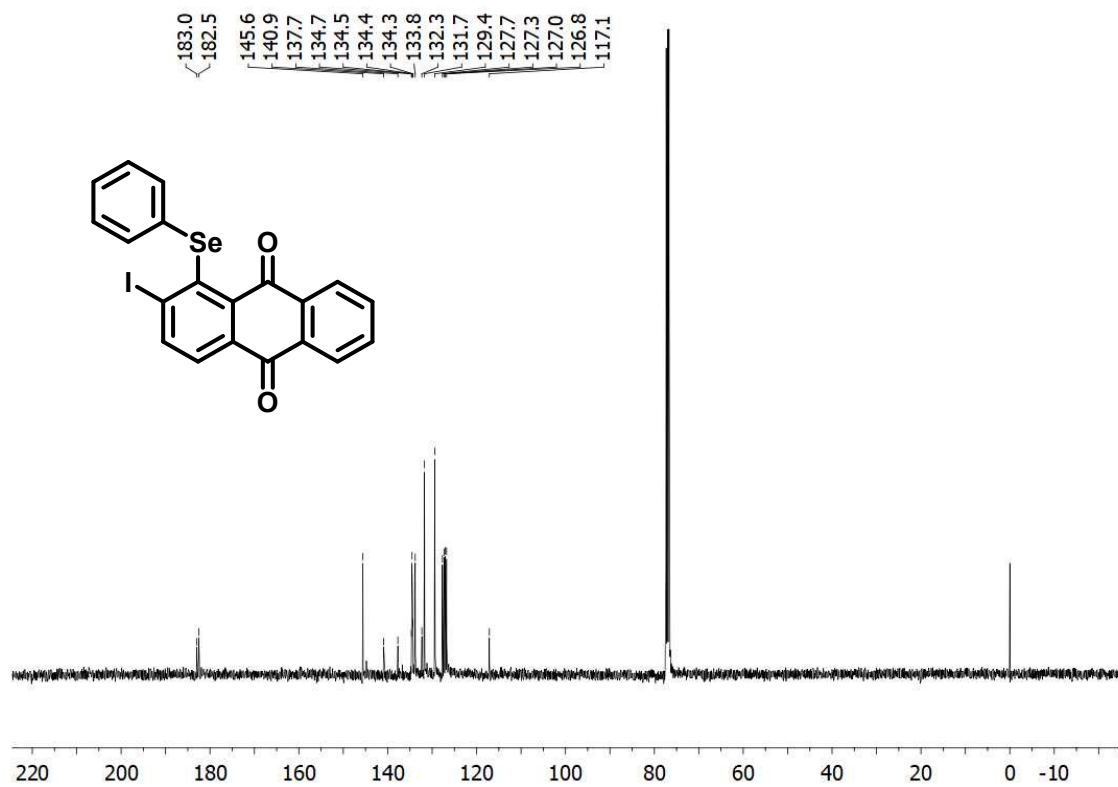

<sup>13</sup>C NMR spectrum (100 MHz, CDCl<sub>3</sub>) of compound **2q**

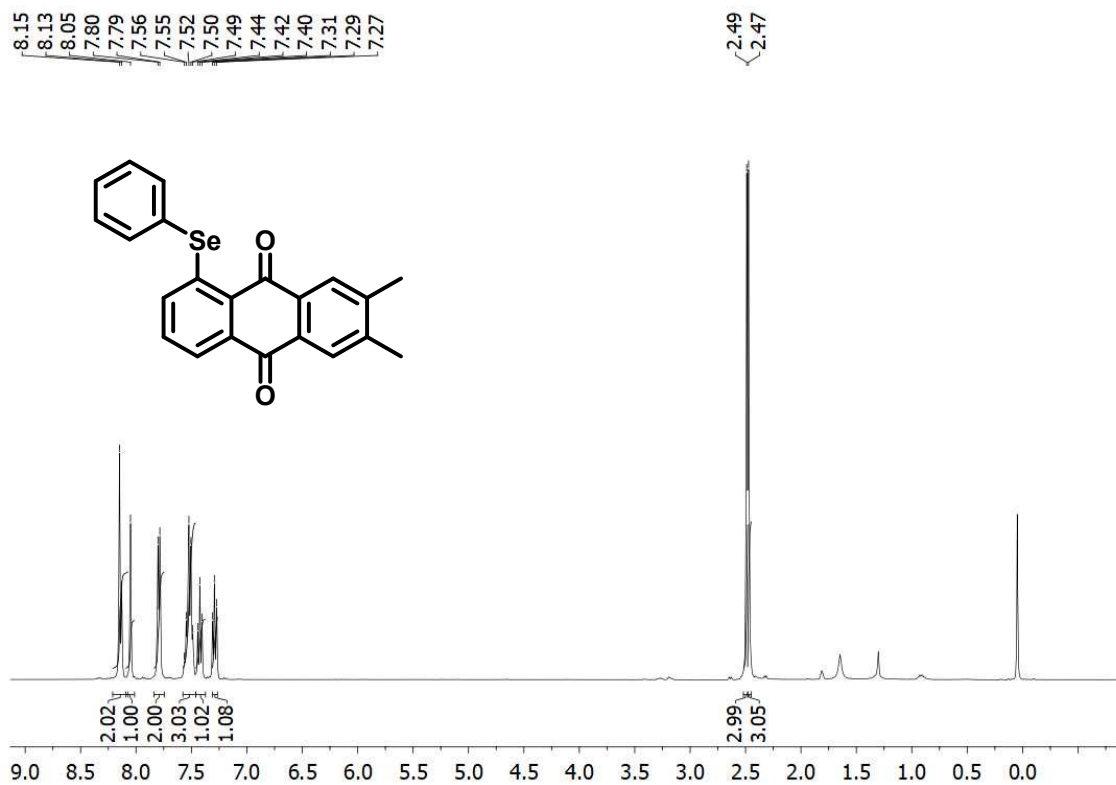

<sup>1</sup>H NMR spectrum (400 MHz, CDCl<sub>3</sub>) of compound **2r**

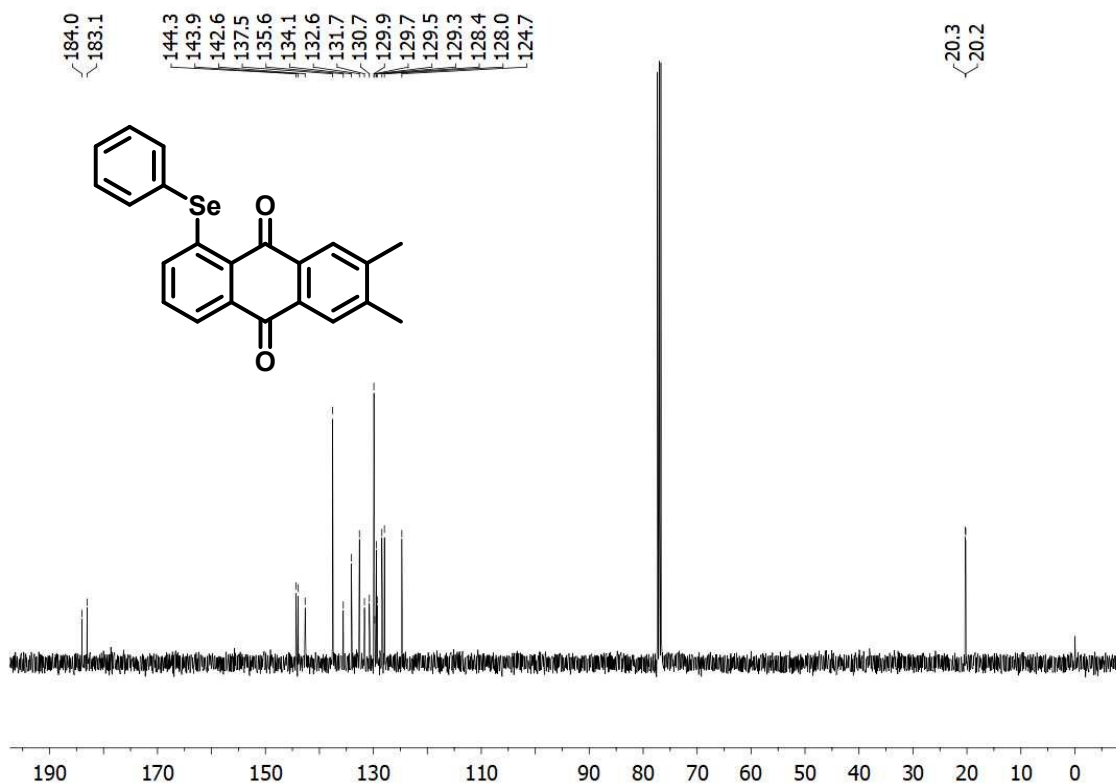

<sup>13</sup>C NMR spectrum (100 MHz, CDCl<sub>3</sub>) of compound **2r**

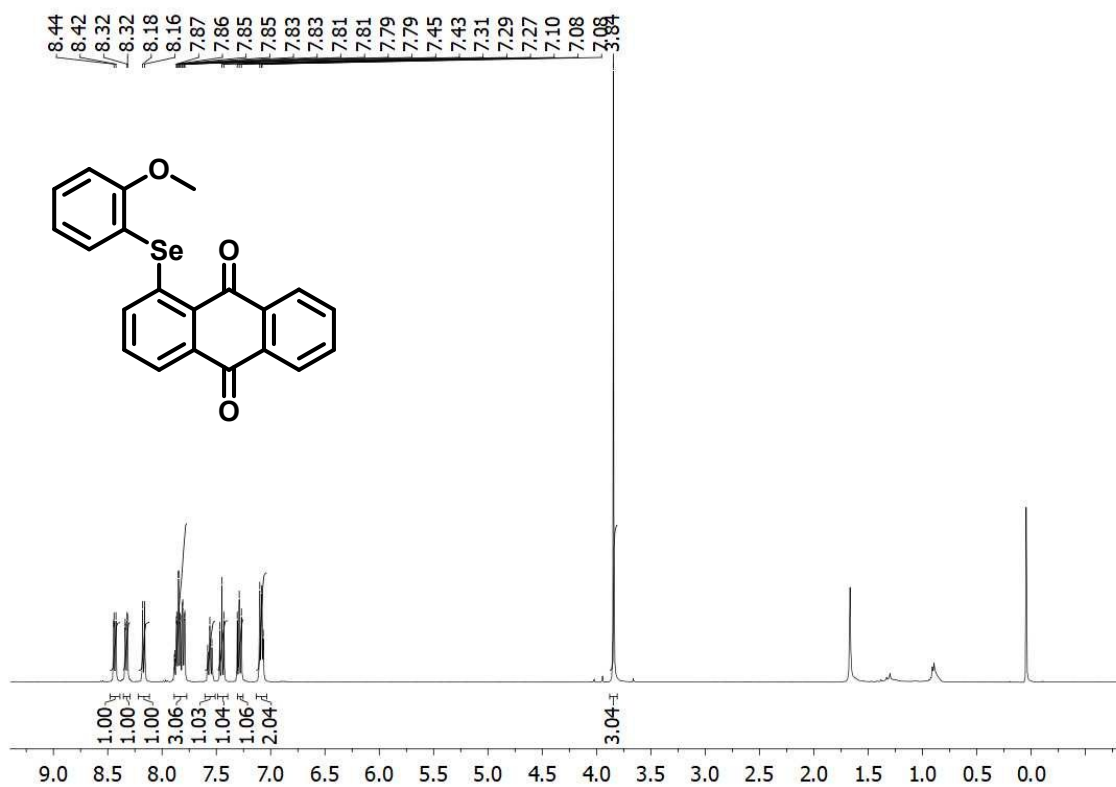

$^1\text{H}$  NMR spectrum (400 MHz,  $\text{CDCl}_3$ ) of compound **2s**

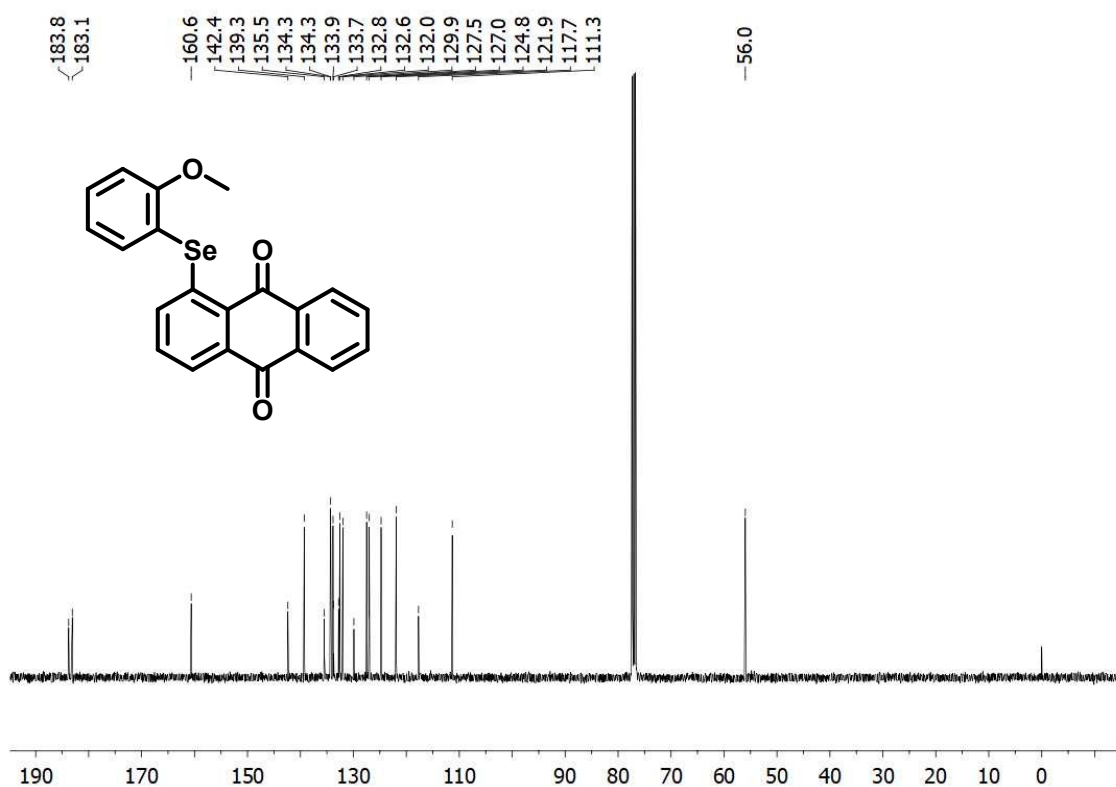

$^{13}\text{C}$  NMR spectrum (100 MHz,  $\text{CDCl}_3$ ) of compound **2s**

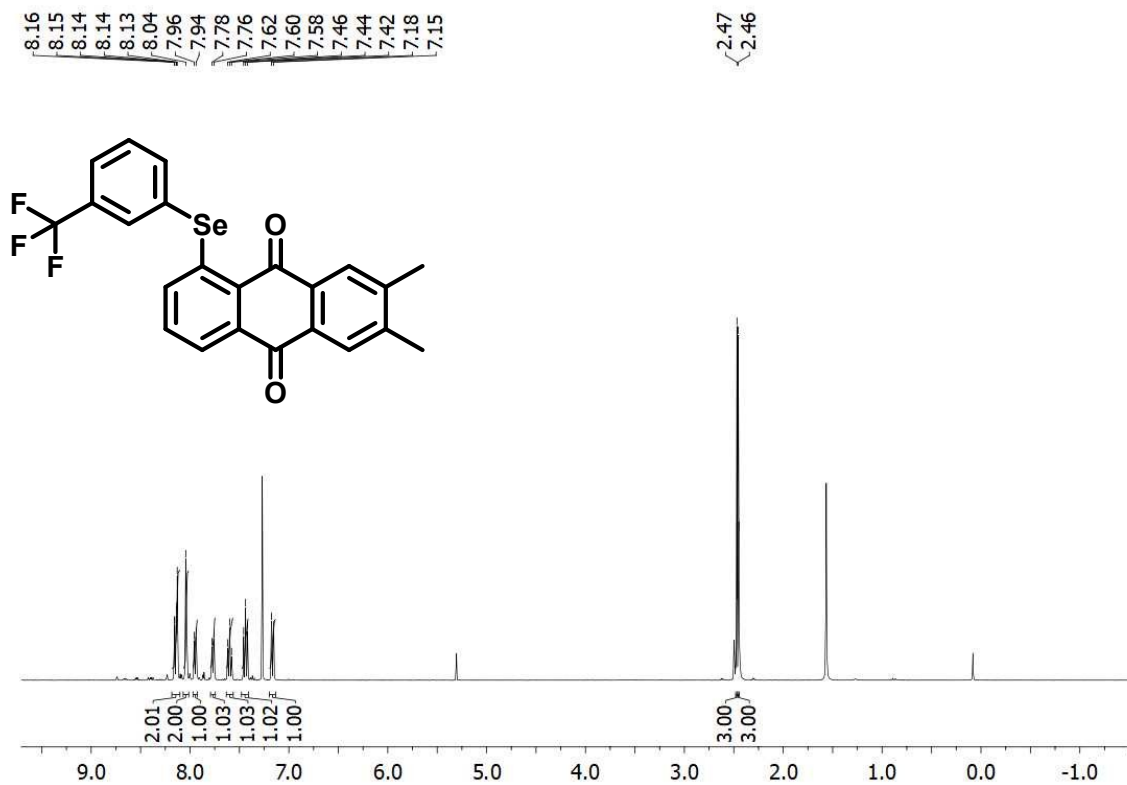

$^1\text{H}$  NMR spectrum (400 MHz,  $\text{CDCl}_3$ ) of compound **2t**

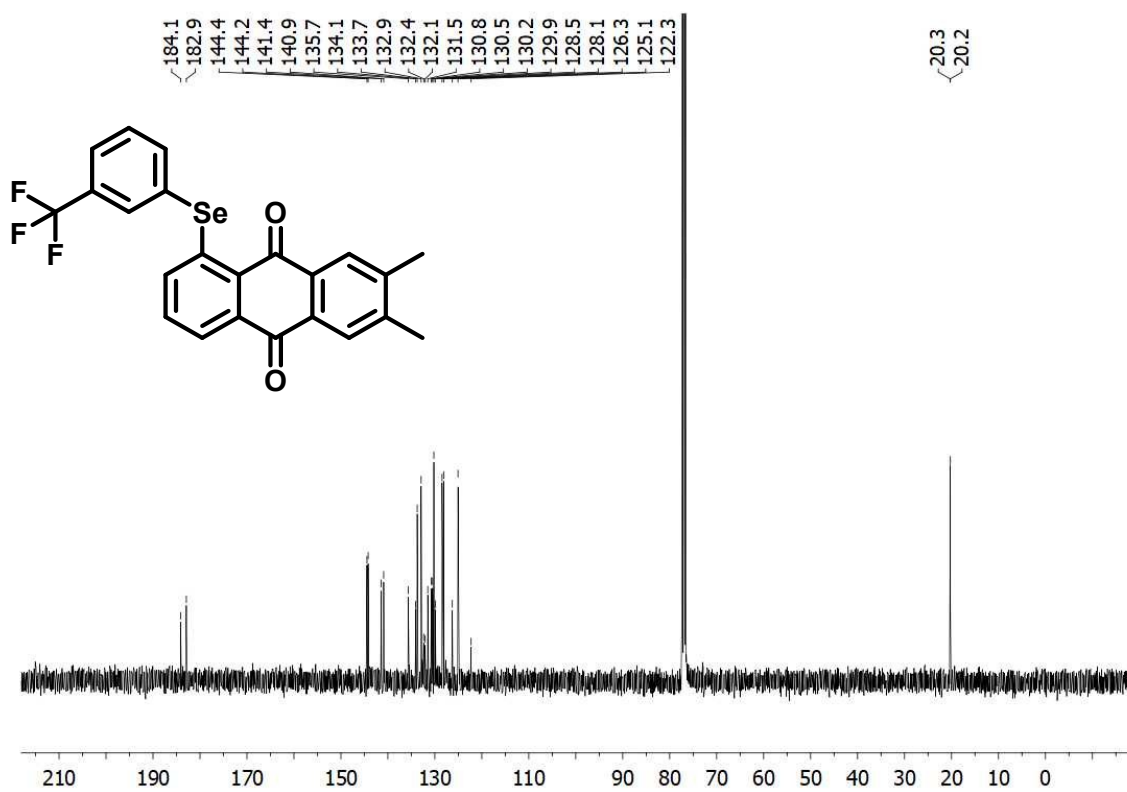

$^{13}\text{C}$  NMR spectrum (100 MHz,  $\text{CDCl}_3$ ) of compound **2t**

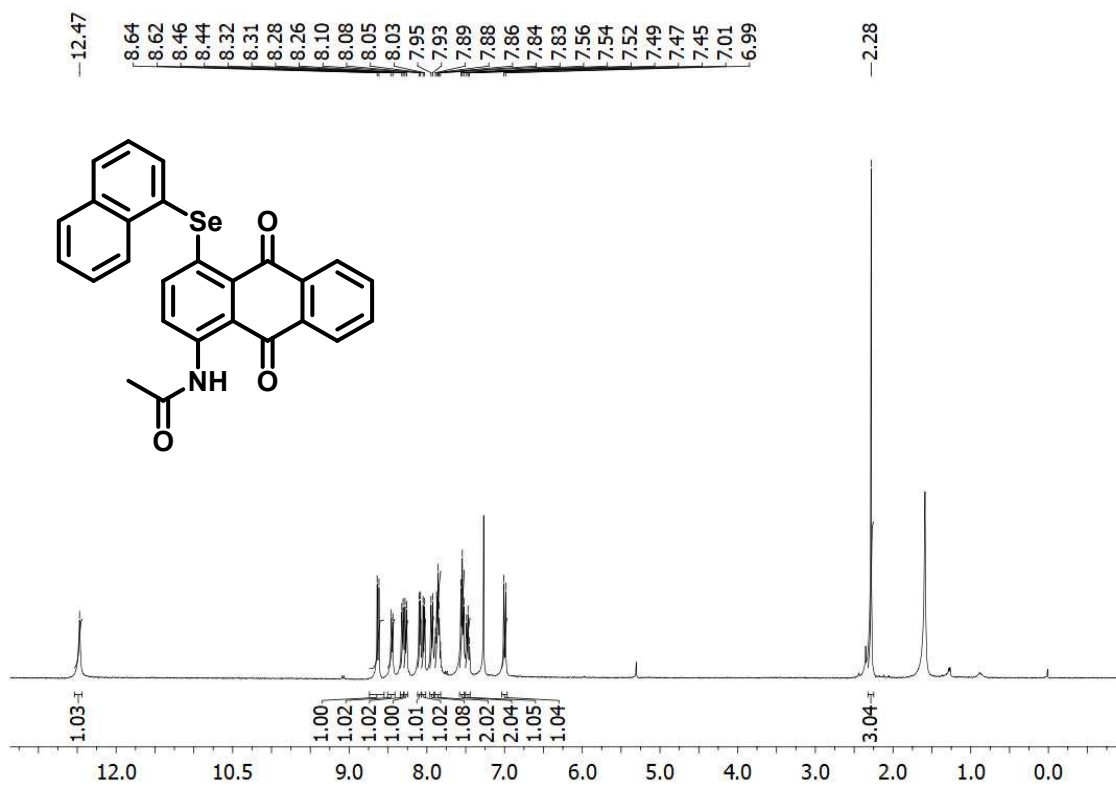

<sup>1</sup>H NMR spectrum (400 MHz, CDCl<sub>3</sub>) of compound **2u**

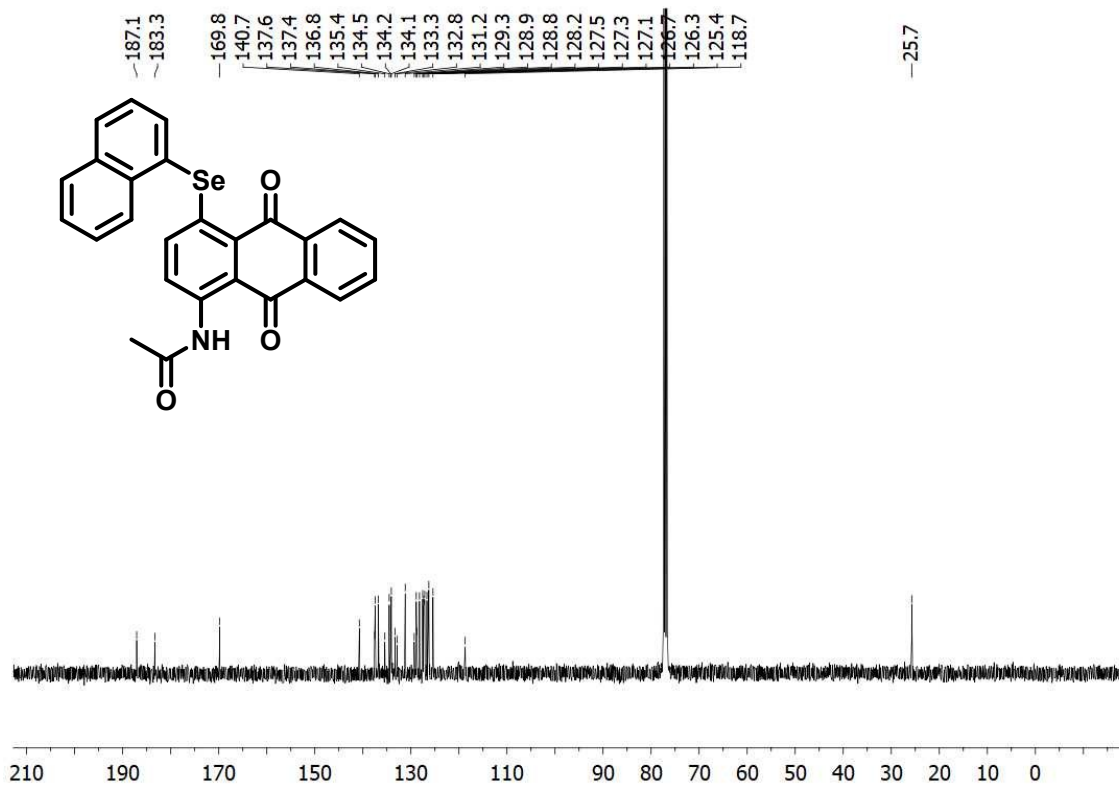

<sup>13</sup>C NMR spectrum (100 MHz, CDCl<sub>3</sub>) of compound **2u**



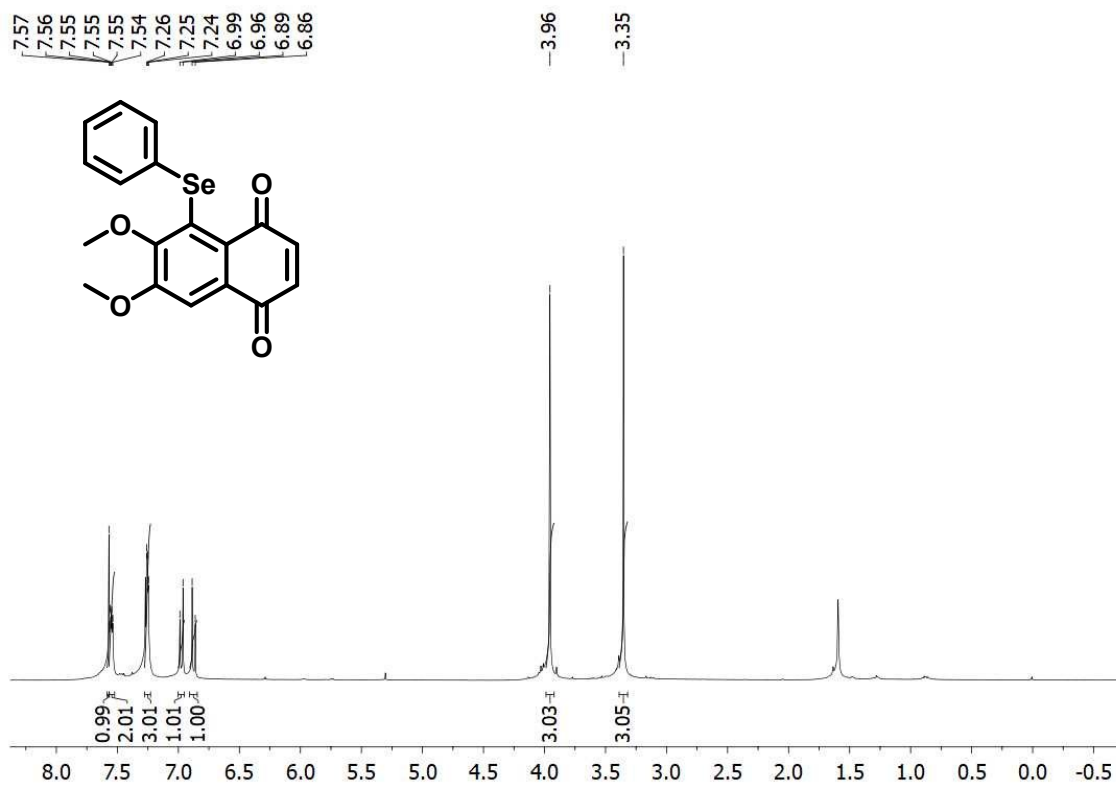

$^1\text{H}$  NMR spectrum (400 MHz,  $\text{CDCl}_3$ ) of compound **2v**

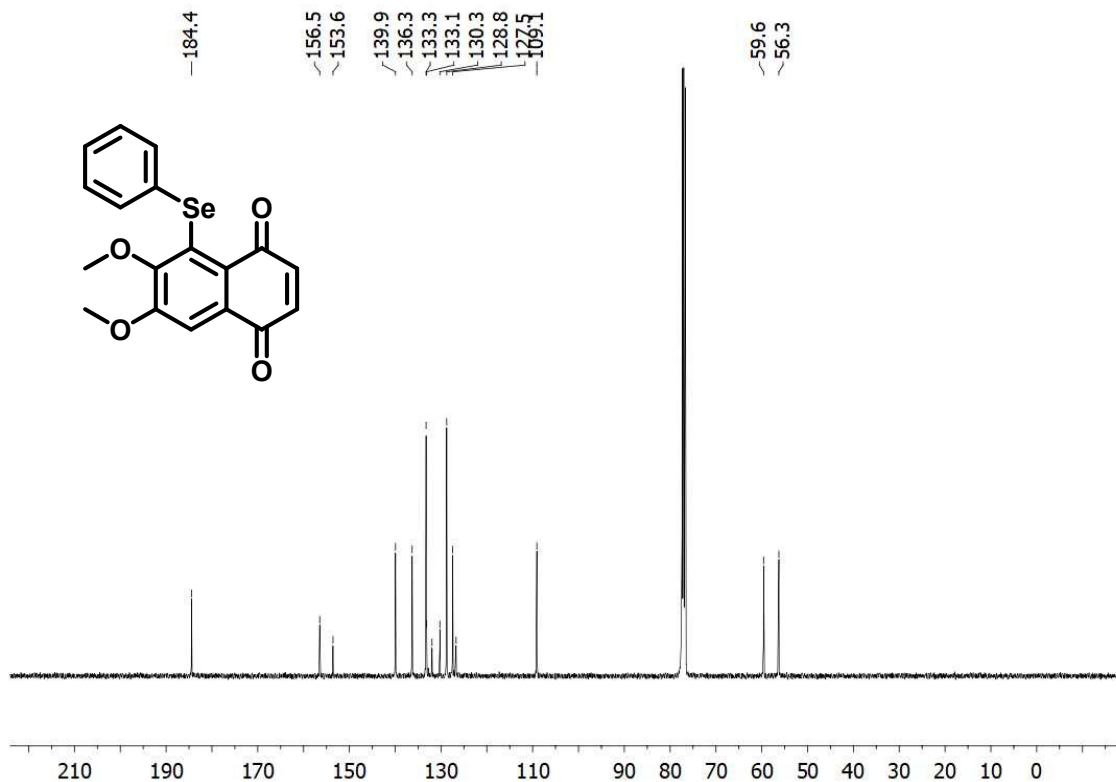

$^{13}\text{C}$  NMR spectrum (100 MHz,  $\text{CDCl}_3$ ) of compound **2v**

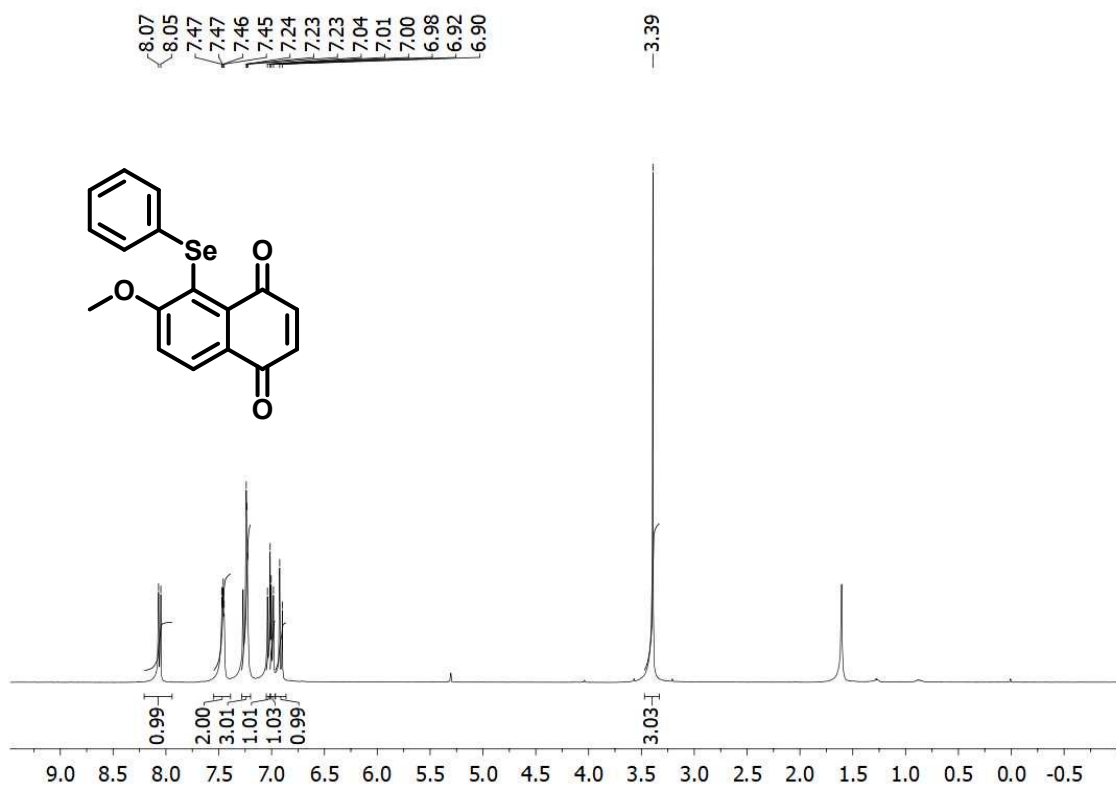

$^1\text{H NMR}$  spectrum (400 MHz,  $\text{CDCl}_3$ ) of compound **2x**

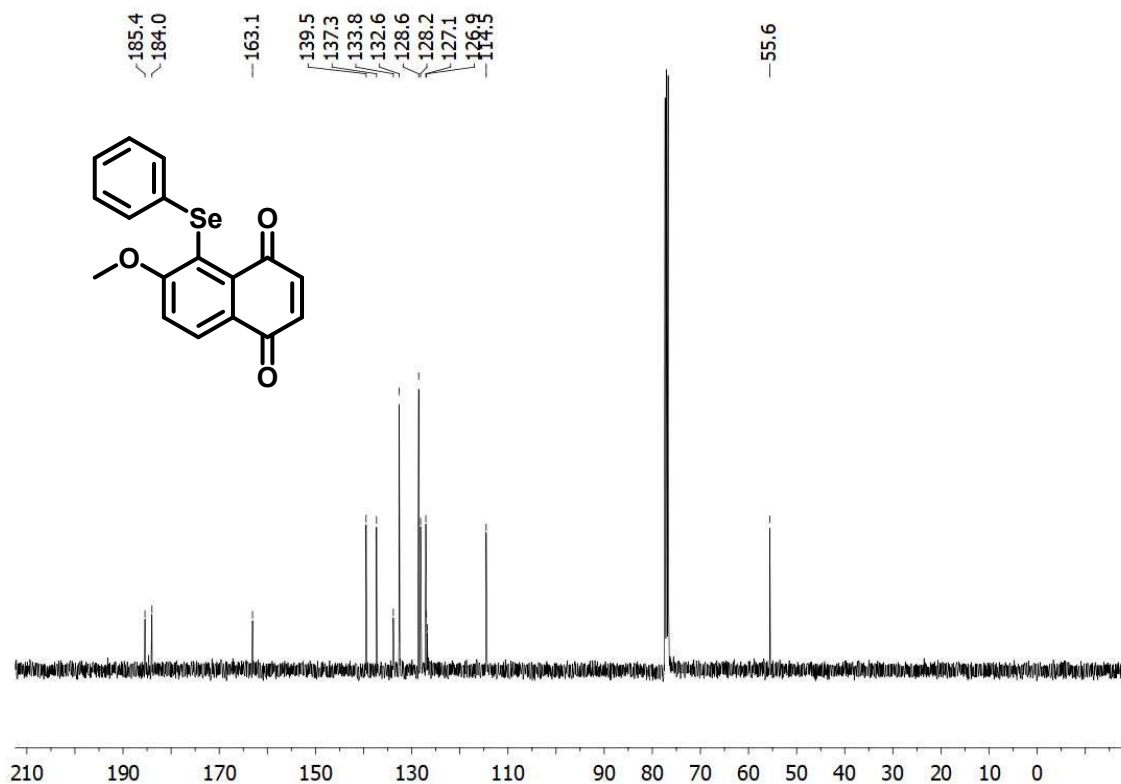

$^{13}\text{C NMR}$  spectrum (100 MHz,  $\text{CDCl}_3$ ) of compound **2x**

# HRMS (APPI<sup>+</sup>) of compound **1p**

## Display Report

|                      |                                                              |                  |                       |                         |
|----------------------|--------------------------------------------------------------|------------------|-----------------------|-------------------------|
| <b>Analysis Info</b> |                                                              | Acquisition Date | 4/17/2019 12:06:14 PM |                         |
| Analysis Name        | D:\Data\LabSELEN Marcelo QMC CFM 17-04-2019\ENSJ 875000002.d |                  | Operator              | tofq                    |
| Method               | DEFAULT_adptado 27 03 2019 APPI até limpeza.m                |                  | Instrument            | micrOTOF-Q 228888.10243 |
| Sample Name          | LabSELEN Marcelo QMC CFM 17-04-2019                          |                  |                       |                         |
| Comment              |                                                              |                  |                       |                         |

### Acquisition Parameter

|             |            |                       |           |                  |           |
|-------------|------------|-----------------------|-----------|------------------|-----------|
| Source Type | APPI       | Ion Polarity          | Positive  | Set Nebulizer    | 1.5 Bar   |
| Focus       | Not active | Set Capillary         | 1500 V    | Set Dry Heater   | 200 °C    |
| Scan Begin  | 50 m/z     | Set End Plate Offset  | -500 V    | Set Dry Gas      | 2.0 l/min |
| Scan End    | 3000 m/z   | Set Collision Cell RF | 600.0 Vpp | Set Divert Valve | Source    |

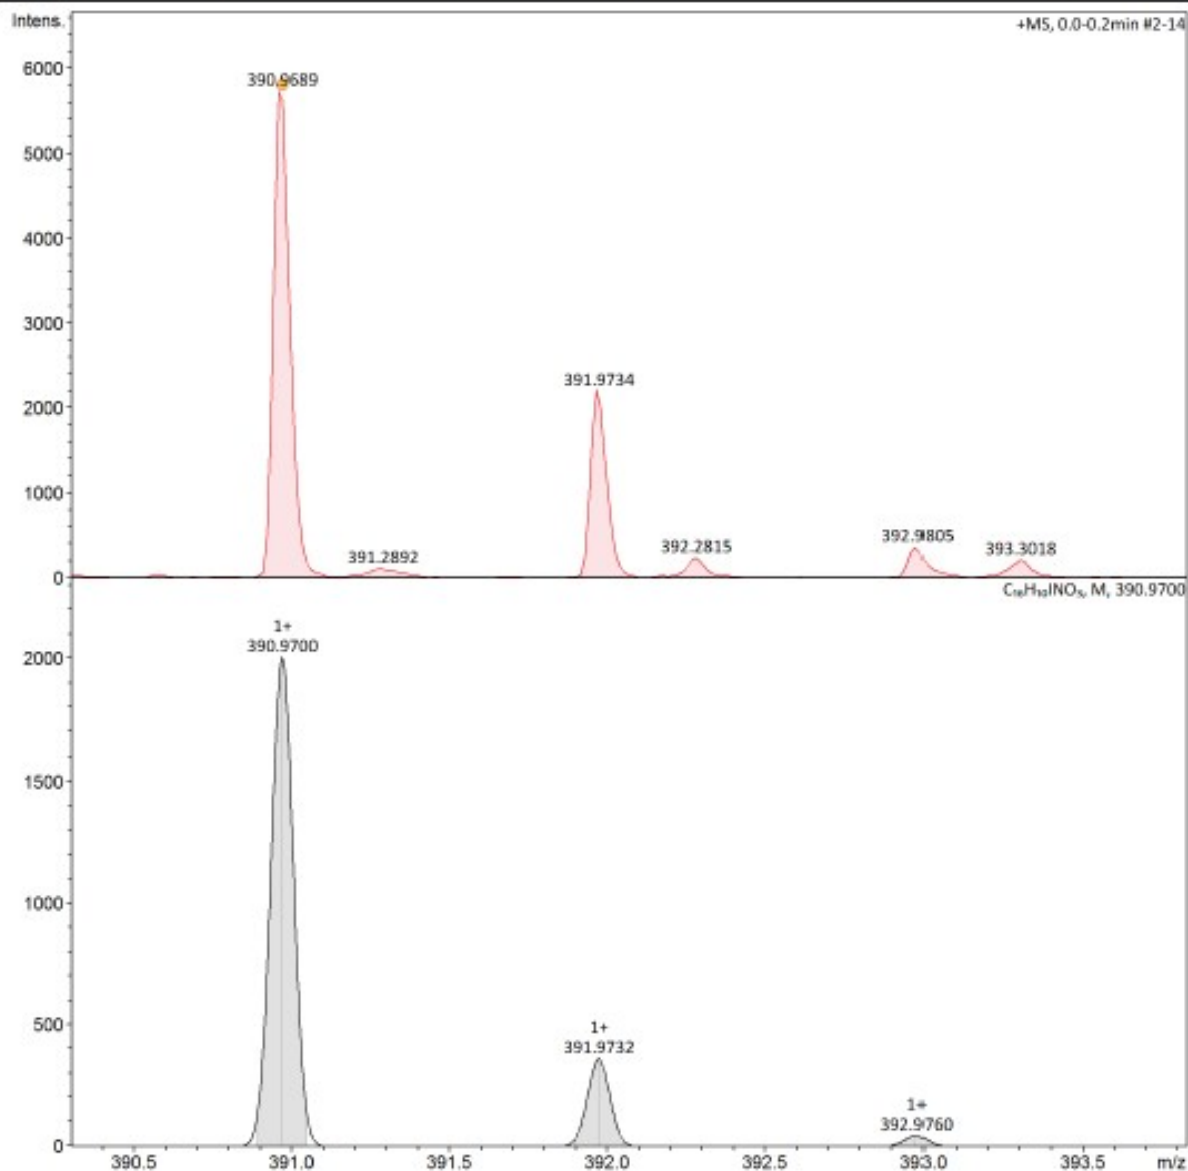

# HRMS (APPI<sup>+</sup>) of compound **1q**

## Display Report

|                      |                                                                             |                  |                         |
|----------------------|-----------------------------------------------------------------------------|------------------|-------------------------|
| <b>Analysis Info</b> |                                                                             | Acquisition Date | 6/10/2019 2:33:23 PM    |
| Analysis Name        | D:\Data\2019\Q-TOF\LabSELEN\LabSELEN Marcelo QMC CFM 10-06-2019\889000001.d | Operator         | micrOTOF-QII            |
| Method               | appi 10 06 19.m                                                             | Instrument       | micrOTOF-Q 228888.10243 |
| Sample Name          | 889                                                                         |                  |                         |
| Comment              |                                                                             |                  |                         |

|                              |            |                       |           |                  |           |
|------------------------------|------------|-----------------------|-----------|------------------|-----------|
| <b>Acquisition Parameter</b> |            |                       |           |                  |           |
| Source Type                  | APPI       | Ion Polarity          | Positive  | Set Nebulizer    | 1.5 Bar   |
| Focus                        | Not active | Set Capillary         | 1500 V    | Set Dry Heater   | 200 °C    |
| Scan Begin                   | 50 m/z     | Set End Plate Offset  | -500 V    | Set Dry Gas      | 2.0 l/min |
| Scan End                     | 1000 m/z   | Set Collision Cell RF | 300.0 Vpp | Set Divert Valve | Source    |

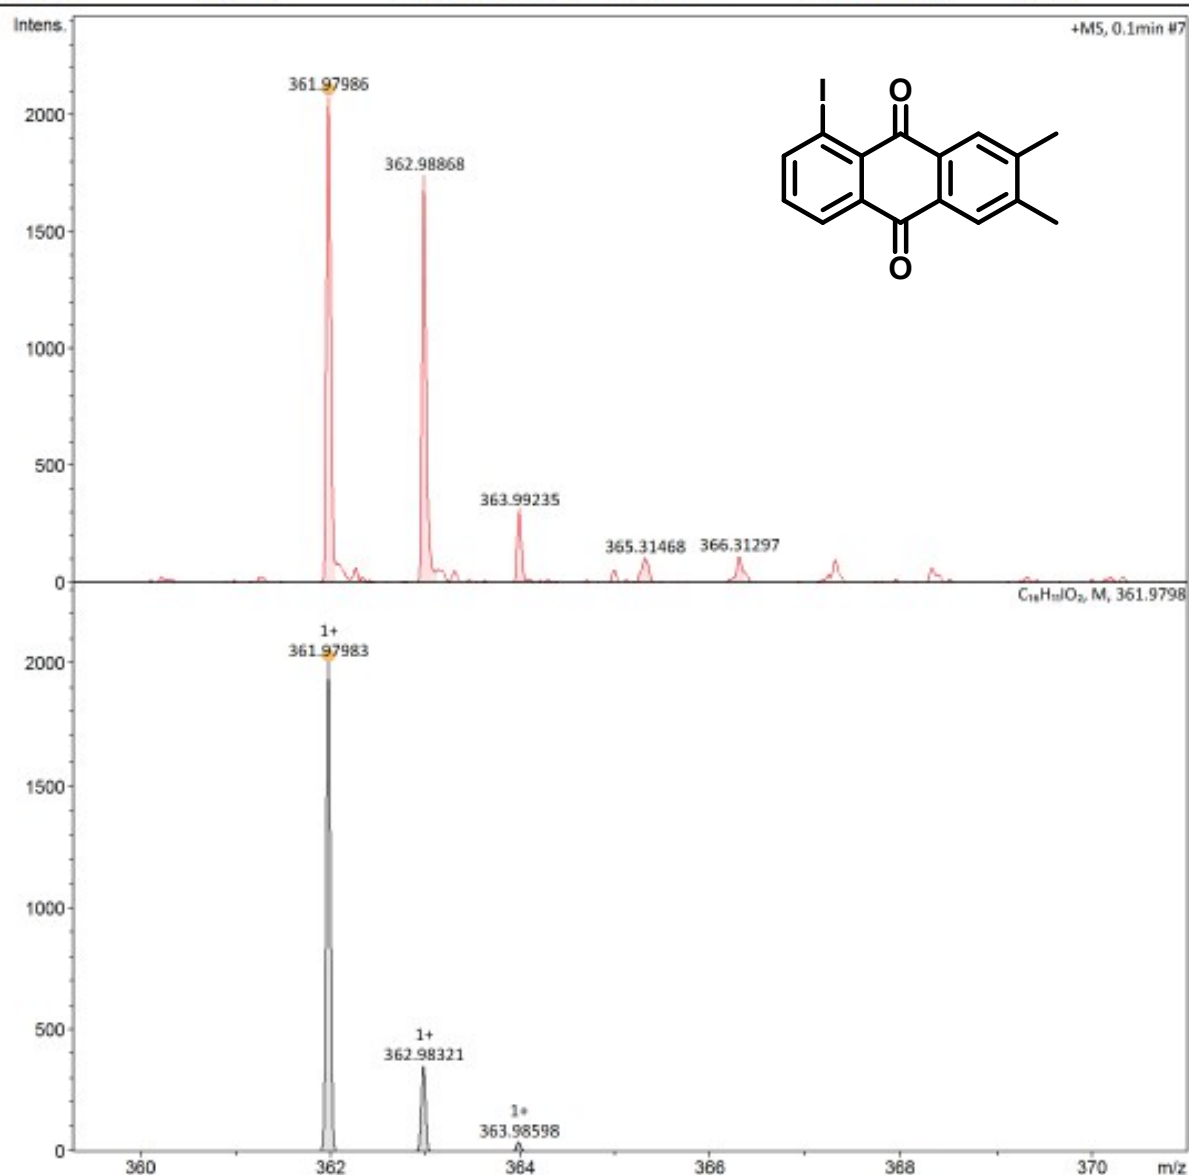

# HRMS (APPI<sup>+</sup>) of compound **2a**

## Display Report

|                      |                                                                             |                                       |
|----------------------|-----------------------------------------------------------------------------|---------------------------------------|
| <b>Analysis Info</b> |                                                                             | Acquisition Date 6/10/2019 3:55:17 PM |
| Analysis Name        | D:\Data\2019\Q-TOF\LabSELEN\LabSELEN Marcelo QMC CFM 10-06-2019\820000001.d | Operator micrOTOF-QII                 |
| Method               | tune low appi 10 06 19.m                                                    | Instrument micrOTOF-Q 228888.10243    |
| Sample Name          | 820                                                                         |                                       |
| Comment              |                                                                             |                                       |

|                              |            |                       |           |                  |           |
|------------------------------|------------|-----------------------|-----------|------------------|-----------|
| <b>Acquisition Parameter</b> |            |                       |           |                  |           |
| Source Type                  | APPI       | Ion Polarity          | Positive  | Set Nebulizer    | 1.5 Bar   |
| Focus                        | Not active | Set Capillary         | 1500 V    | Set Dry Heater   | 200 °C    |
| Scan Begin                   | 50 m/z     | Set End Plate Offset  | -500 V    | Set Dry Gas      | 2.0 l/min |
| Scan End                     | 2000 m/z   | Set Collision Cell RF | 300.0 Vpp | Set Divert Valve | Source    |

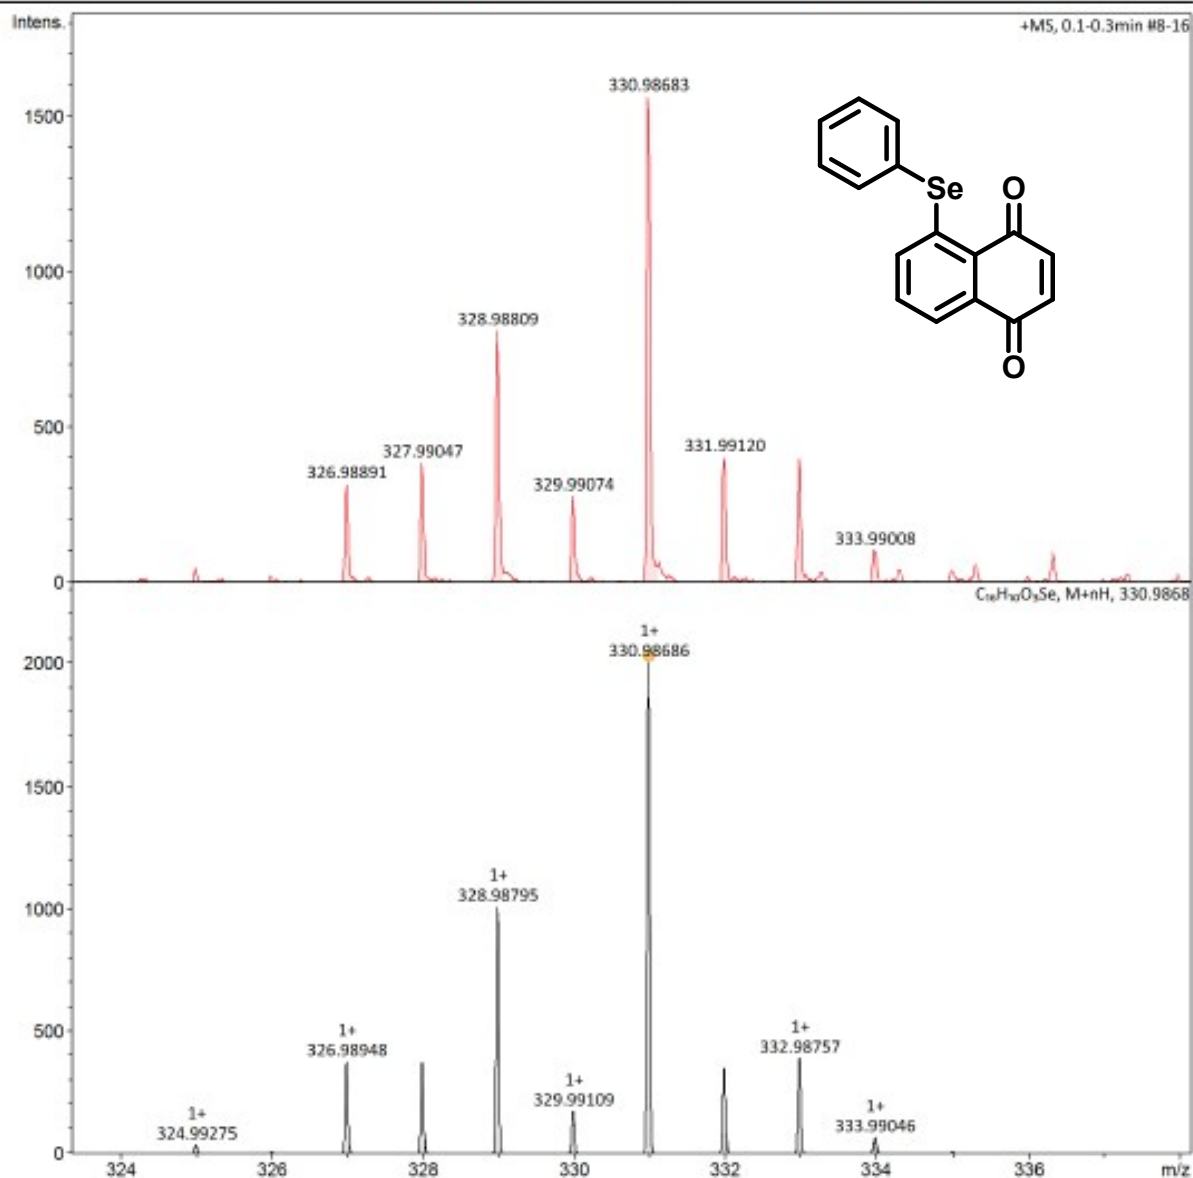

HRMS (APPI<sup>+</sup>) of compound **2b**

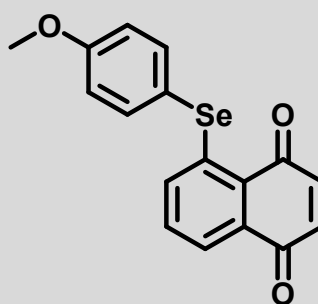

# HRMS (APPI<sup>+</sup>) of compound **2c**

## Display Report

**Analysis Info**

|               |                                                                             |
|---------------|-----------------------------------------------------------------------------|
| Analysis Name | D:\Data\2019\Q-TOF\LabSELEN\LabSELEN Marcelo QMC CFM 10-06-2019\821000001.d |
| Method        | tune low appi 10 06 19.m                                                    |
| Sample Name   | 821                                                                         |
| Comment       |                                                                             |

Acquisition Date 6/10/2019 4:11:13 PM

Operator micrOTOF-QII

Instrument micrOTOF-Q 228888.10243

**Acquisition Parameter**

|             |            |                       |           |                  |           |
|-------------|------------|-----------------------|-----------|------------------|-----------|
| Source Type | APPI       | Ion Polarity          | Positive  | Set Nebulizer    | 1.5 Bar   |
| Focus       | Not active | Set Capillary         | 1500 V    | Set Dry Heater   | 200 °C    |
| Scan Begin  | 50 m/z     | Set End Plate Offset  | -500 V    | Set Dry Gas      | 2.0 l/min |
| Scan End    | 2000 m/z   | Set Collision Cell RF | 300.0 Vpp | Set Divert Valve | Source    |

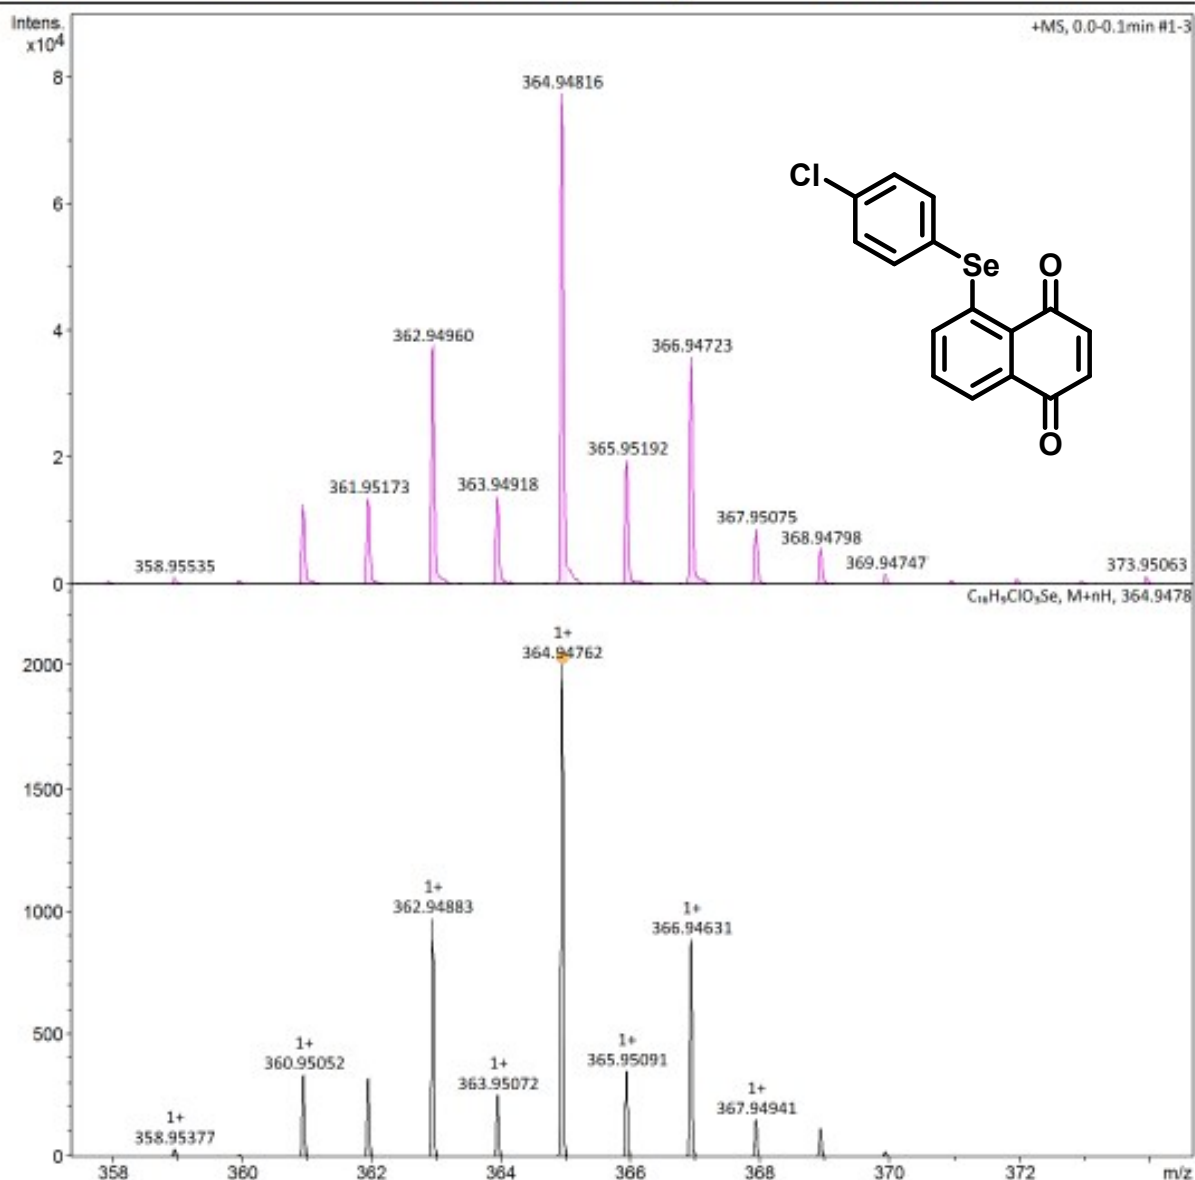

# HRMS (APPI<sup>+</sup>) of compound **2d**

## Display Report

|                      |                                                                             |                                       |
|----------------------|-----------------------------------------------------------------------------|---------------------------------------|
| <b>Analysis Info</b> |                                                                             | Acquisition Date 6/10/2019 4:51:24 PM |
| Analysis Name        | D:\Data\2019\Q-TOF\LabSELEN\LabSELEN Marcelo QMC CFM 10-06-2019\823000002.d | Operator micrOTOF-QII                 |
| Method               | tune low appi 10 06 19 Vanessa.m                                            | Instrument micrOTOF-Q 228888.10243    |
| Sample Name          | 823                                                                         |                                       |
| Comment              |                                                                             |                                       |

|                              |            |                       |           |                  |           |
|------------------------------|------------|-----------------------|-----------|------------------|-----------|
| <b>Acquisition Parameter</b> |            |                       |           |                  |           |
| Source Type                  | APPI       | Ion Polarity          | Positive  | Set Nebulizer    | 1.5 Bar   |
| Focus                        | Not active | Set Capillary         | 1500 V    | Set Dry Heater   | 200 °C    |
| Scan Begin                   | 50 m/z     | Set End Plate Offset  | -500 V    | Set Dry Gas      | 2.0 l/min |
| Scan End                     | 2000 m/z   | Set Collision Cell RF | 300.0 Vpp | Set Divert Valve | Source    |

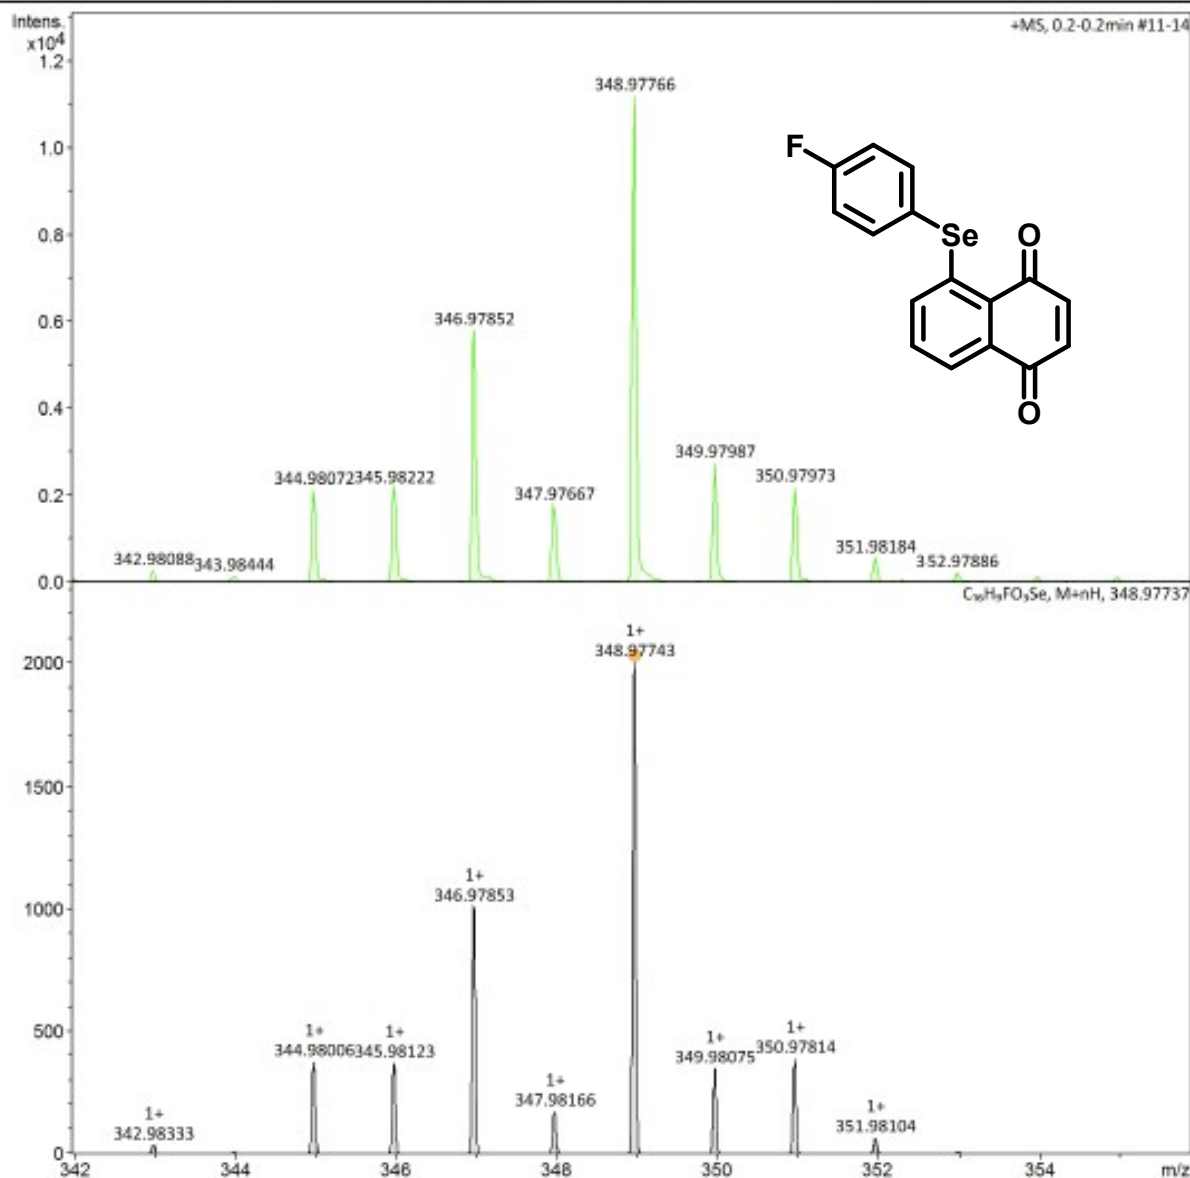



# HRMS (APPI<sup>+</sup>) of compound **2e**

## Display Report

|                      |                                                              |                  |                         |  |
|----------------------|--------------------------------------------------------------|------------------|-------------------------|--|
| <b>Analysis Info</b> |                                                              | Acquisition Date | 4/17/2019 10:13:27 AM   |  |
| Analysis Name        | D:\Data\LabSELEN Marcelo QMC CFM 17-04-2019\ENSJ 822000004.d | Operator         | tofq                    |  |
| Method               | DEFAULT_adptado 27 03 2019 APPI até limpeza.m                | Instrument       | micrOTOF-Q 228888.10243 |  |
| Sample Name          | LabSELEN Marcelo QMC CFM 17-04-2019                          | Comment          |                         |  |

|                              |            |                       |           |                  |           |
|------------------------------|------------|-----------------------|-----------|------------------|-----------|
| <b>Acquisition Parameter</b> |            |                       |           |                  |           |
| Source Type                  | APPI       | Ion Polarity          | Positive  | Set Nebulizer    | 1.5 Bar   |
| Focus                        | Not active | Set Capillary         | 1500 V    | Set Dry Heater   | 200 °C    |
| Scan Begin                   | 50 m/z     | Set End Plate Offset  | -500 V    | Set Dry Gas      | 2.0 l/min |
| Scan End                     | 3000 m/z   | Set Collision Cell RF | 600.0 Vpp | Set Divert Valve | Source    |

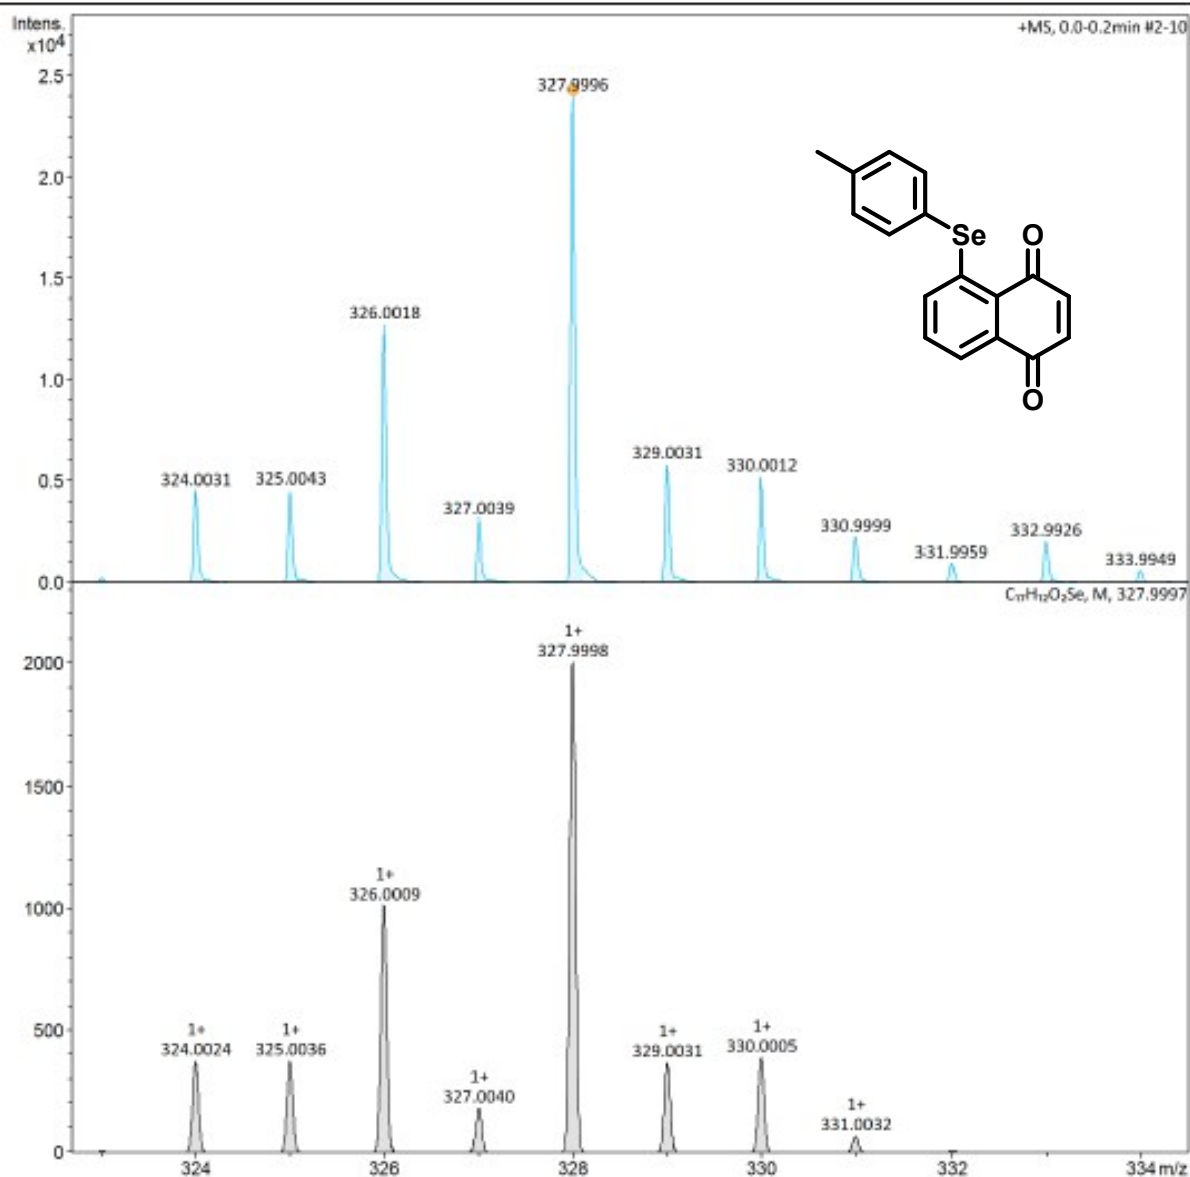

# HRMS (APPI<sup>+</sup>) of compound **2k**

## Display Report

**Analysis Info**

Analysis Name D:\Data\LabSelen 11.01.19\GJSC060000004.d  
 Method DEFAULT\_adptado Elis APPI.m  
 Sample Name GJSC060  
 Comment

Acquisition Date 1/11/2019 10:03:09 AM

Operator tofq  
 Instrument micrOTOF-Q 228888.10243

**Acquisition Parameter**

|             |            |                       |           |                  |           |
|-------------|------------|-----------------------|-----------|------------------|-----------|
| Source Type | APPI       | Ion Polarity          | Positive  | Set Nebulizer    | 1.5 Bar   |
| Focus       | Not active | Set Capillary         | 1200 V    | Set Dry Heater   | 200 °C    |
| Scan Begin  | 50 m/z     | Set End Plate Offset  | -500 V    | Set Dry Gas      | 2.0 l/min |
| Scan End    | 3000 m/z   | Set Collision Cell RF | 600.0 Vpp | Set Divert Valve | Source    |

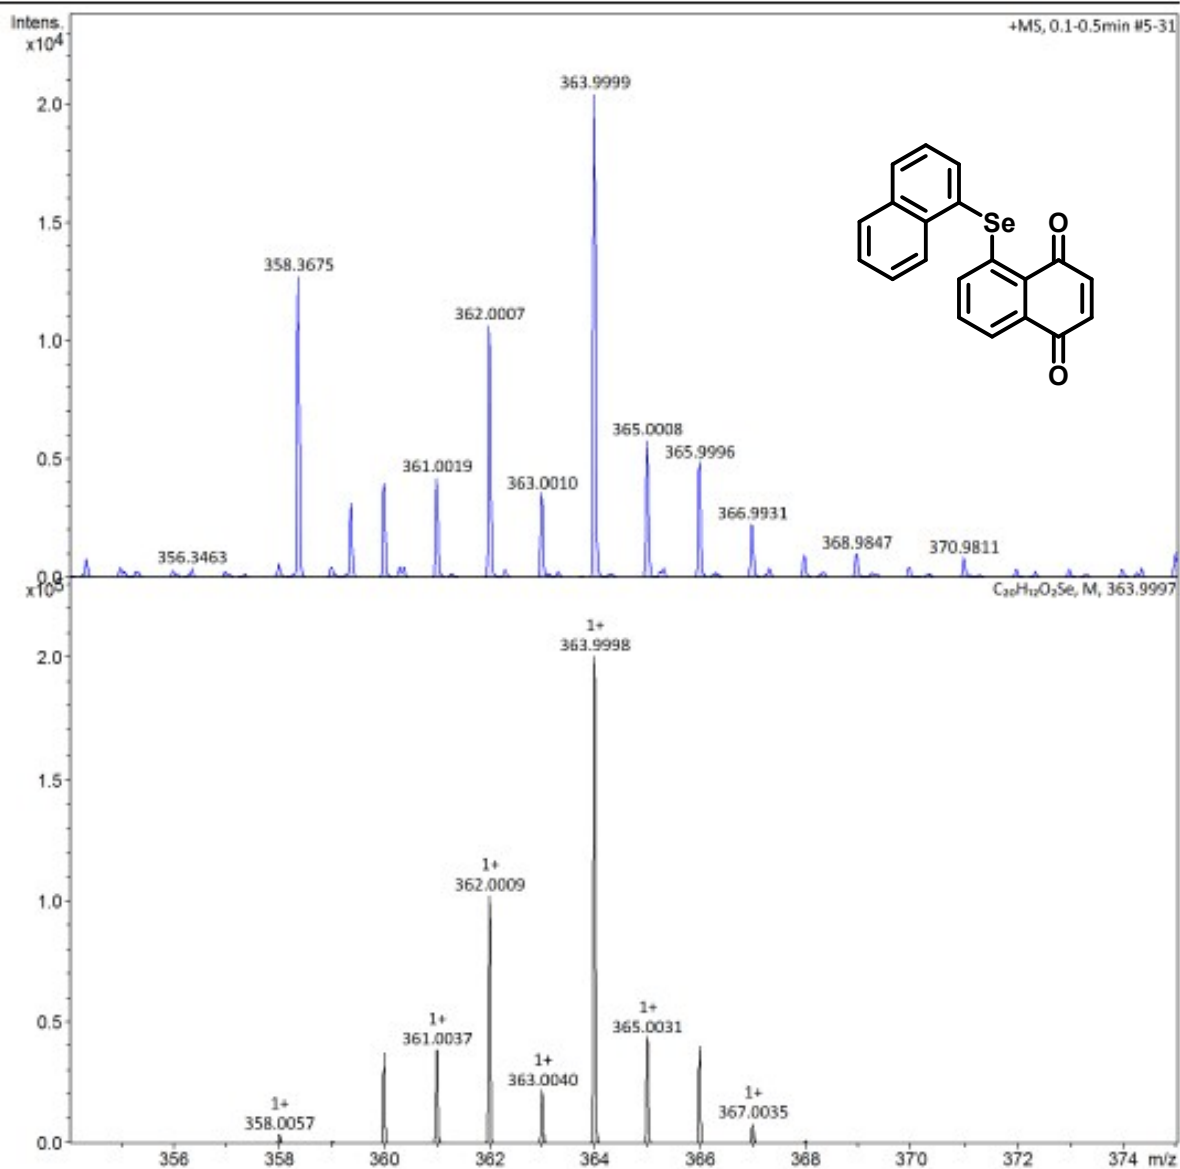

# HRMS (APPI<sup>+</sup>) of compound **21**

## Display Report

### Analysis Info

Analysis Name D:\Data\LabSelen 11.01.19\GJSC056000002.d  
 Method tune\_low\_2018.m  
 Sample Name GJSC056  
 Comment

Acquisition Date 1/11/2019 11:34:01 AM

Operator tofq  
 Instrument micrOTOF-Q 228888.10243

### Acquisition Parameter

|             |            |                       |           |                  |           |
|-------------|------------|-----------------------|-----------|------------------|-----------|
| Source Type | APPI       | Ion Polarity          | Positive  | Set Nebulizer    | 1.5 Bar   |
| Focus       | Not active | Set Capillary         | 1500 V    | Set Dry Heater   | 200 °C    |
| Scan Begin  | 50 m/z     | Set End Plate Offset  | -500 V    | Set Dry Gas      | 2.0 l/min |
| Scan End    | 2000 m/z   | Set Collision Cell RF | 200.0 Vpp | Set Divert Valve | Source    |

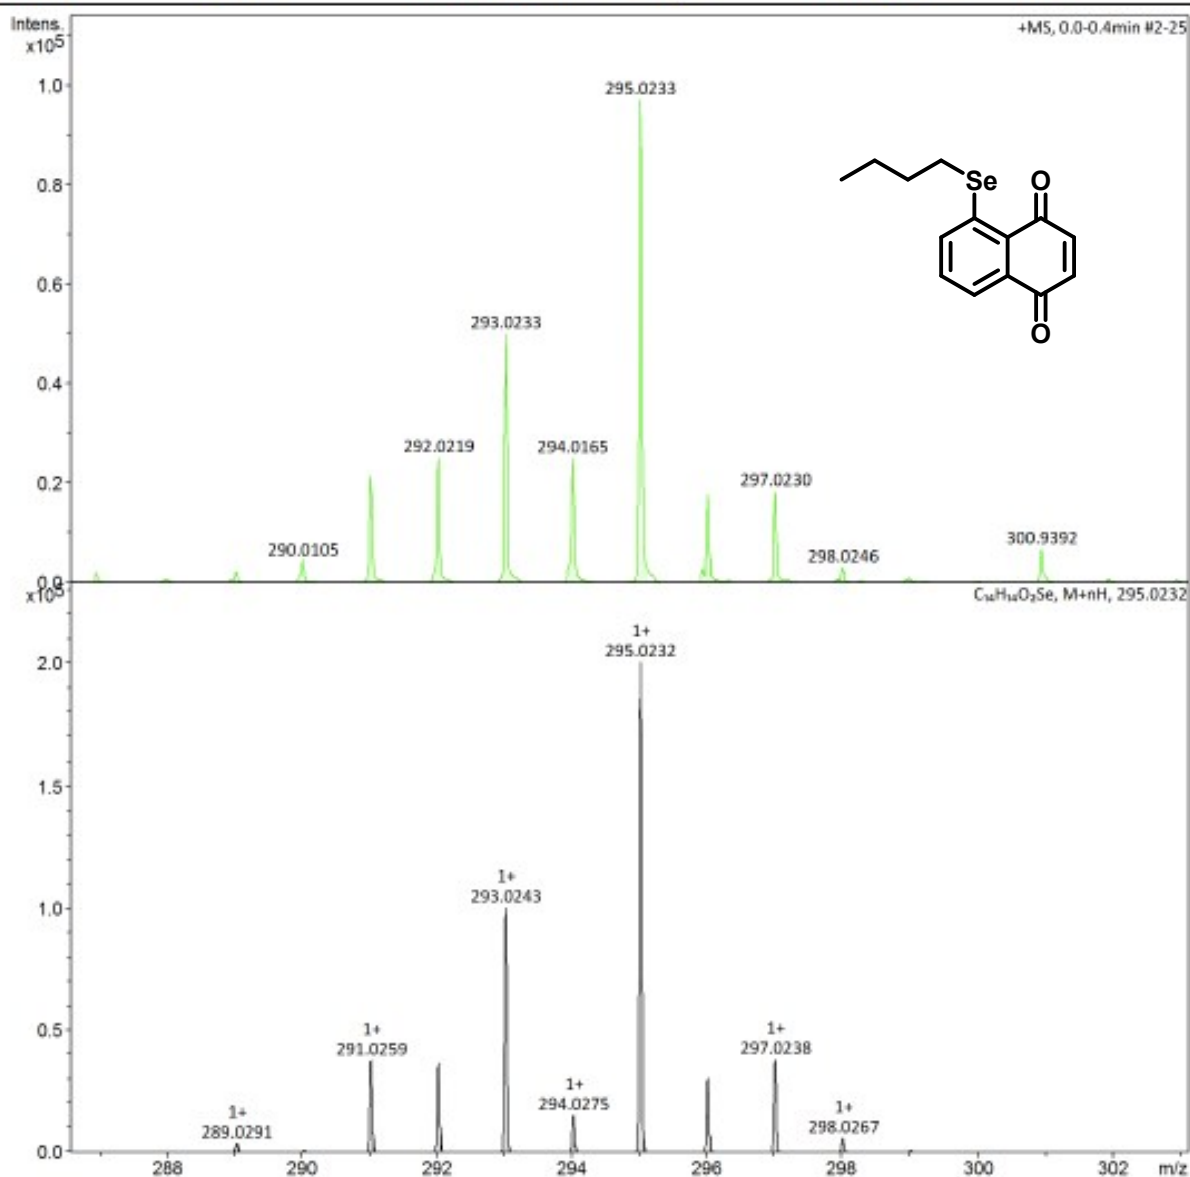

# HRMS (APPI<sup>+</sup>) of compound **2m**

## Display Report

**Analysis Info**

Analysis Name D:\Data\LabSelen 11.01.19\GJSC061000001.d  
 Method DEFAULT\_adptado Elis APPI.m  
 Sample Name GJSC061  
 Comment

Acquisition Date 1/11/2019 10:11:40 AM

Operator tofq  
 Instrument micrOTOF-Q 228888.10243

**Acquisition Parameter**

|             |            |                       |           |                  |           |
|-------------|------------|-----------------------|-----------|------------------|-----------|
| Source Type | APPI       | Ion Polarity          | Positive  | Set Nebulizer    | 1.5 Bar   |
| Focus       | Not active | Set Capillary         | 1200 V    | Set Dry Heater   | 200 °C    |
| Scan Begin  | 50 m/z     | Set End Plate Offset  | -500 V    | Set Dry Gas      | 2.0 l/min |
| Scan End    | 3000 m/z   | Set Collision Cell RF | 600.0 Vpp | Set Divert Valve | Source    |

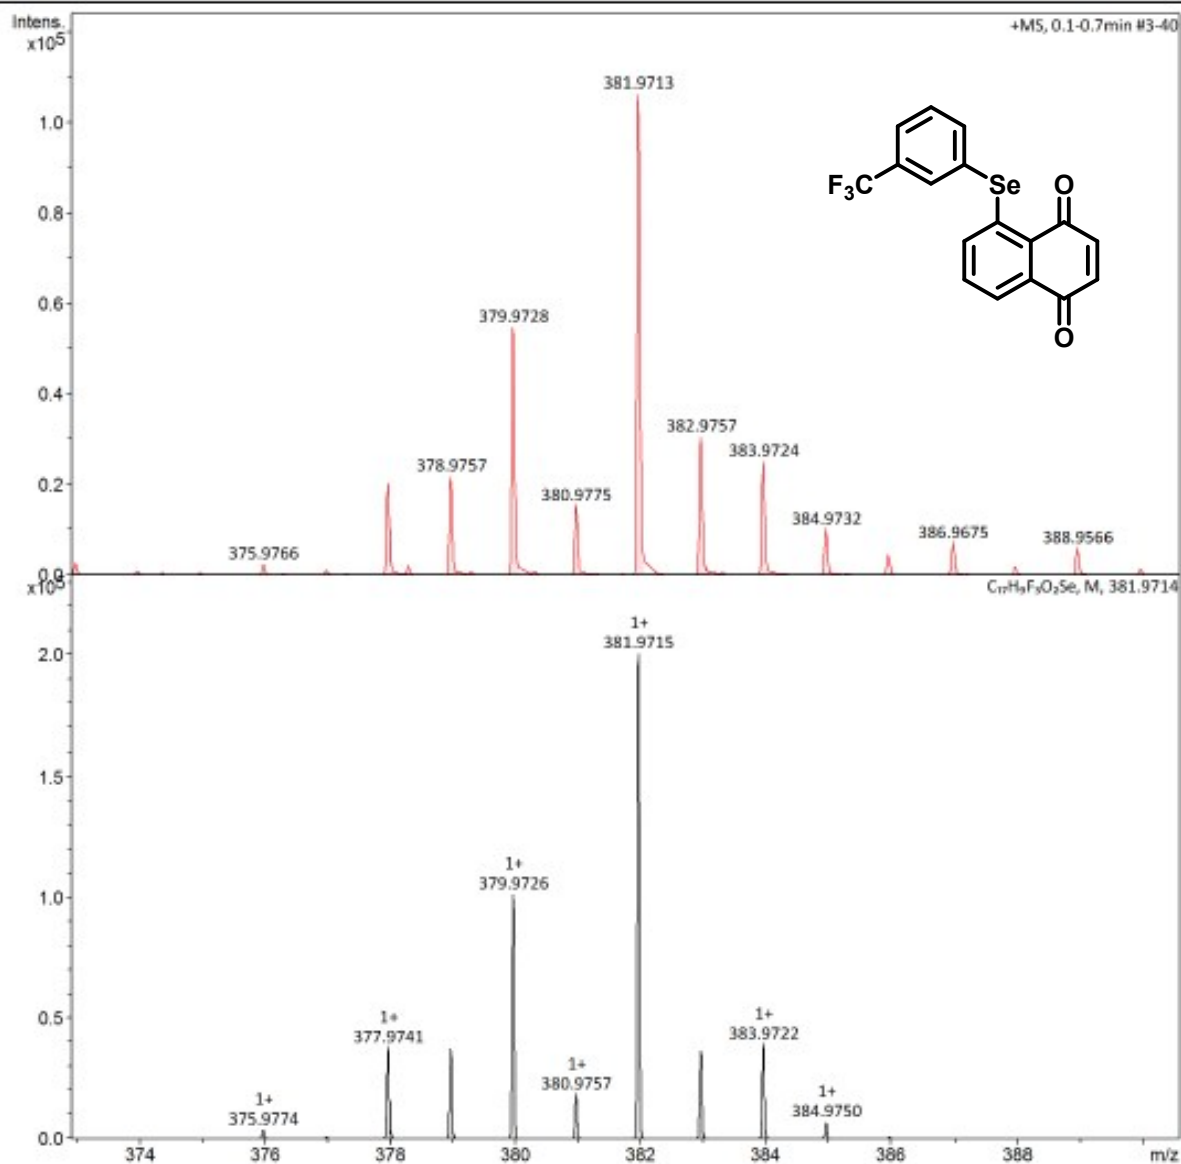

# HRMS (APPI<sup>+</sup>) of compound **2n**

## Display Report

**Analysis Info**

Analysis Name D:\Data\LabSelen 11.01.19\GJSC088000001.d  
 Method testeinical APPI\_Elis.m  
 Sample Name GJSC088  
 Comment

Acquisition Date 1/11/2019 10:30:12 AM

Operator tofq  
 Instrument micrOTOF-Q 228888.10243

**Acquisition Parameter**

|             |            |                       |           |                  |           |
|-------------|------------|-----------------------|-----------|------------------|-----------|
| Source Type | APPI       | Ion Polarity          | Positive  | Set Nebulzer     | 1.5 Bar   |
| Focus       | Not active | Set Capillary         | 1500 V    | Set Dry Heater   | 200 °C    |
| Scan Begin  | 200 m/z    | Set End Plate Offset  | -500 V    | Set Dry Gas      | 2.0 l/min |
| Scan End    | 3000 m/z   | Set Collision Cell RF | 600.0 Vpp | Set Divert Valve | Source    |

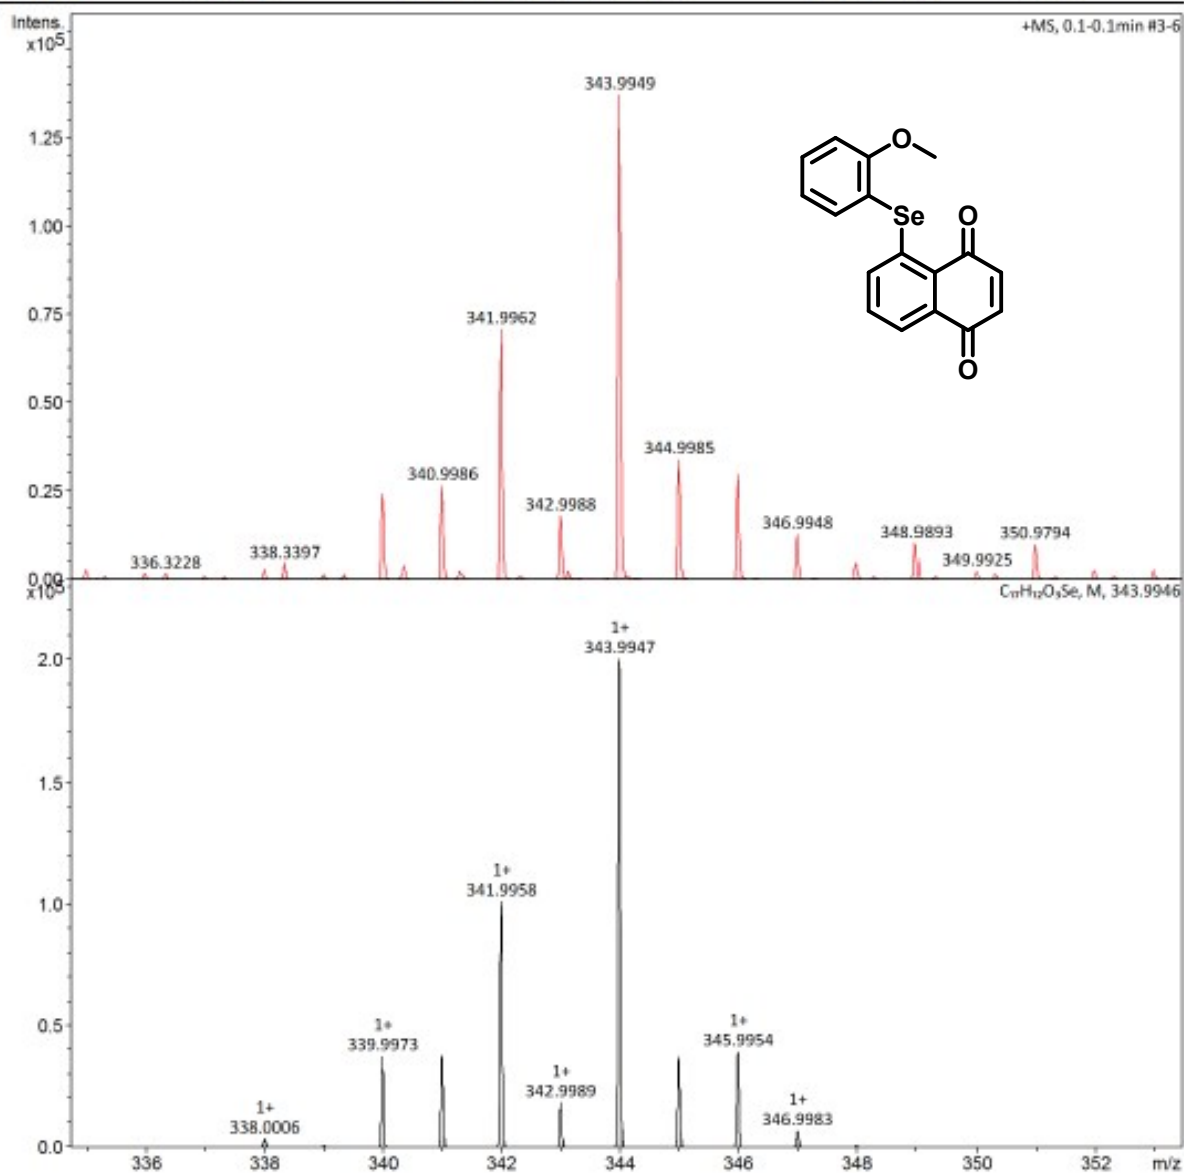

# HRMS (APPI<sup>+</sup>) of compound **2o**

## Display Report

|                      |                                                              |                  |                       |                         |
|----------------------|--------------------------------------------------------------|------------------|-----------------------|-------------------------|
| <b>Analysis Info</b> |                                                              | Acquisition Date | 4/17/2019 11:48:37 AM |                         |
| Analysis Name        | D:\Data\LabSELEN Marcelo QMC CFM 17-04-2019\ENSJ 874000003.d |                  | Operator              | tofq                    |
| Method               | DEFAULT_adptado 27 03 2019 APPI até limpeza.m                |                  | Instrument            | micrOTOF-Q 228888.10243 |
| Sample Name          | LabSELEN Marcelo QMC CFM 17-04-2019                          |                  | Comment               |                         |

### Acquisition Parameter

|             |            |                       |           |                  |           |
|-------------|------------|-----------------------|-----------|------------------|-----------|
| Source Type | APPI       | Ion Polarity          | Positive  | Set Nebulizer    | 1.5 Bar   |
| Focus       | Not active | Set Capillary         | 1500 V    | Set Dry Heater   | 200 °C    |
| Scan Begin  | 50 m/z     | Set End Plate Offset  | -500 V    | Set Dry Gas      | 2.0 l/min |
| Scan End    | 3000 m/z   | Set Collision Cell RF | 600.0 Vpp | Set Divert Valve | Source    |

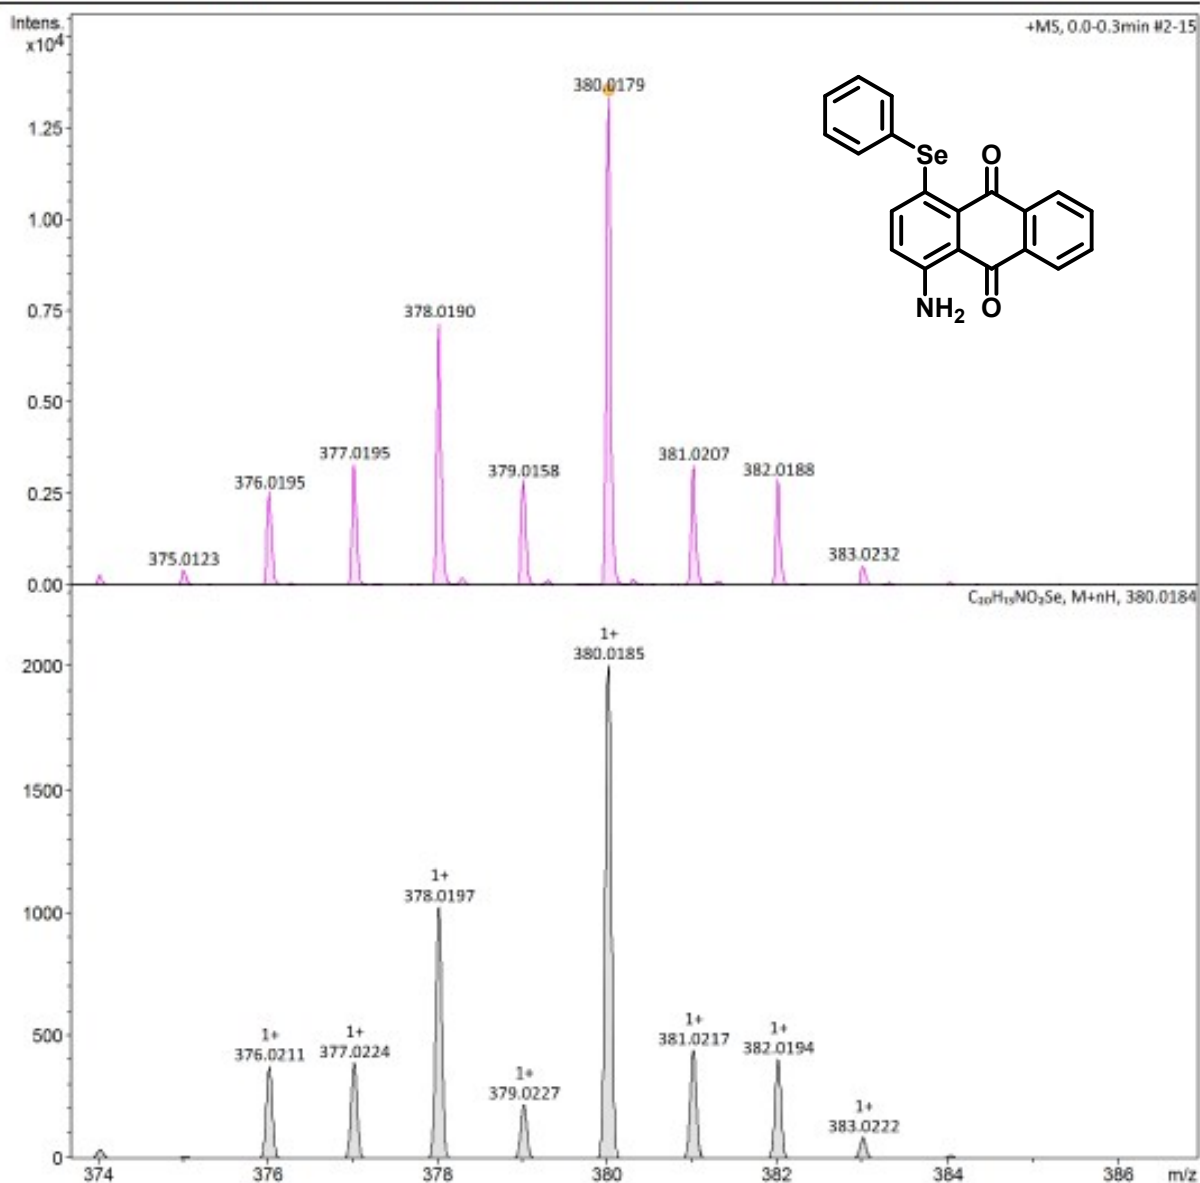

# HRMS (APPI<sup>+</sup>) of compound 2p

## Display Report

### Analysis Info

|               |                                                              |                  |                         |
|---------------|--------------------------------------------------------------|------------------|-------------------------|
| Analysis Name | D:\Data\LabSELEN Marcelo QMC CFM 17-04-2019\ENSJ 871000007.d | Acquisition Date | 4/17/2019 12:51:22 PM   |
| Method        | DEFAULT_adptado 27 03 2019 APPI até limpeza.m                | Operator         | tofq                    |
| Sample Name   | LabSELEN Marcelo QMC CFM 17-04-2019                          | Instrument       | micrOTOF-Q 228888.10243 |
| Comment       |                                                              |                  |                         |

### Acquisition Parameter

|             |            |                       |           |                  |           |
|-------------|------------|-----------------------|-----------|------------------|-----------|
| Source Type | APPI       | Ion Polarity          | Positive  | Set Nebulizer    | 1.5 Bar   |
| Focus       | Not active | Set Capillary         | 1500 V    | Set Dry Heater   | 200 °C    |
| Scan Begin  | 50 m/z     | Set End Plate Offset  | -500 V    | Set Dry Gas      | 2.0 l/min |
| Scan End    | 3000 m/z   | Set Collision Cell RF | 600.0 Vpp | Set Divert Valve | Source    |

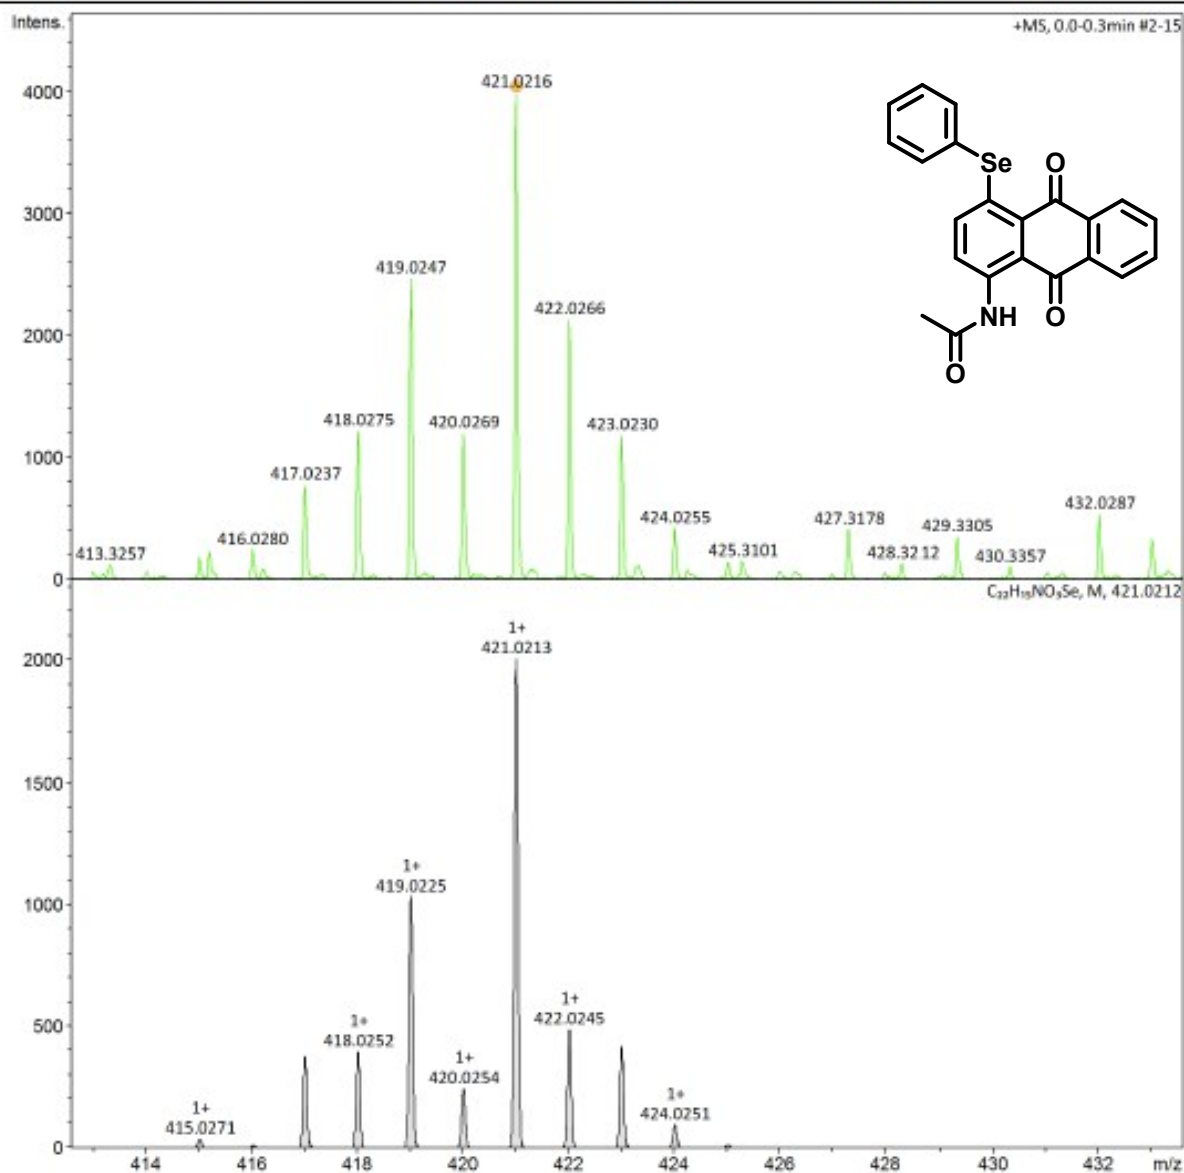

# HRMS (APPI<sup>+</sup>) of compound 2q

## Display Report

|                      |                                                              |                  |                      |                         |
|----------------------|--------------------------------------------------------------|------------------|----------------------|-------------------------|
| <b>Analysis Info</b> |                                                              | Acquisition Date | 4/17/2019 9:58:05 AM |                         |
| Analysis Name        | D:\Data\LabSELEN Marcelo QMC CFM 17-04-2019\ENSJ 870000007.d |                  | Operator             | tofq                    |
| Method               | DEFAULT_adptado 27 03 2019 APPI até limpeza.m                |                  | Instrument           | micrOTOF-Q 228888.10243 |
| Sample Name          | LabSELEN Marcelo QMC CFM 17-04-2019                          |                  |                      |                         |
| Comment              |                                                              |                  |                      |                         |

### Acquisition Parameter

|             |            |                       |           |                  |           |
|-------------|------------|-----------------------|-----------|------------------|-----------|
| Source Type | APPI       | Ion Polarity          | Positive  | Set Nebulizer    | 1.5 Bar   |
| Focus       | Not active | Set Capillary         | 1500 V    | Set Dry Heater   | 200 °C    |
| Scan Begin  | 50 m/z     | Set End Plate Offset  | -500 V    | Set Dry Gas      | 2.0 l/min |
| Scan End    | 3000 m/z   | Set Collision Cell RF | 600.0 Vpp | Set Divert Valve | Source    |

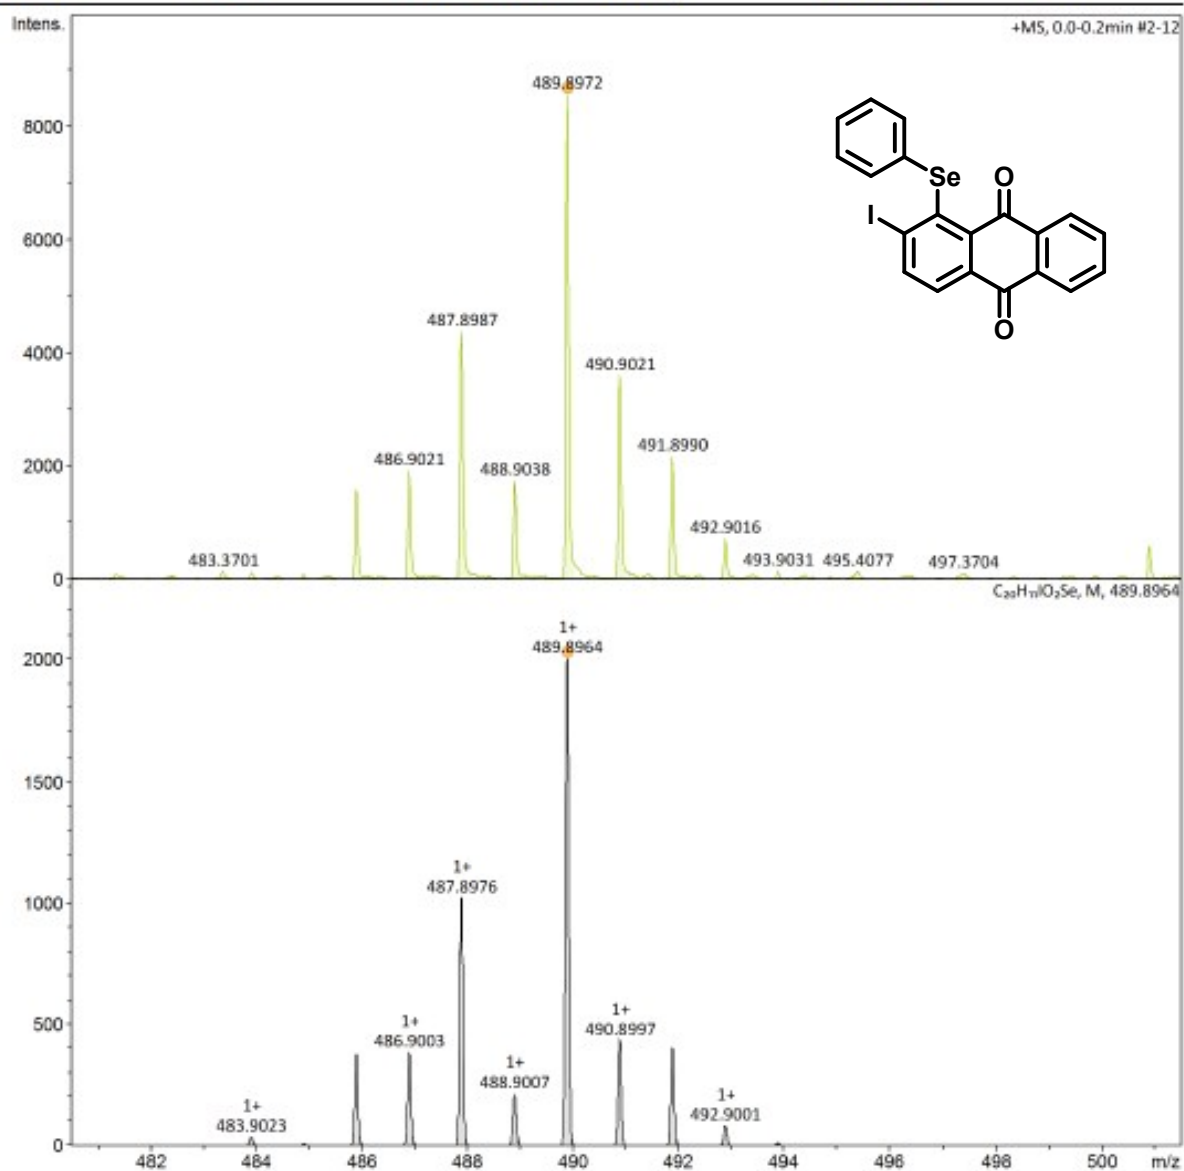



# HRMS (APPI<sup>+</sup>) of compound **2r**

## Display Report

|                      |                                                              |                                        |
|----------------------|--------------------------------------------------------------|----------------------------------------|
| <b>Analysis Info</b> |                                                              | Acquisition Date 4/17/2019 10:42:34 AM |
| Analysis Name        | D:\Data\LabSELEN Marcelo QMC CFM 17-04-2019\ENSJ 872000004.d |                                        |
| Method               | DEFAULT_adptado 27 03 2019 APPI até limpeza.m                | Operator tofq                          |
| Sample Name          | LabSELEN Marcelo QMC CFM 17-04-2019                          | Instrument microTOF-Q 228888.10243     |
| Comment              |                                                              |                                        |

### Acquisition Parameter

|             |            |                       |           |                  |           |
|-------------|------------|-----------------------|-----------|------------------|-----------|
| Source Type | APPI       | Ion Polarity          | Positive  | Set Nebulizer    | 1.5 Bar   |
| Focus       | Not active | Set Capillary         | 1500 V    | Set Dry Heater   | 200 °C    |
| Scan Begin  | 50 m/z     | Set End Plate Offset  | -500 V    | Set Dry Gas      | 2.0 l/min |
| Scan End    | 3000 m/z   | Set Collision Cell RF | 600.0 Vpp | Set Divert Valve | Source    |

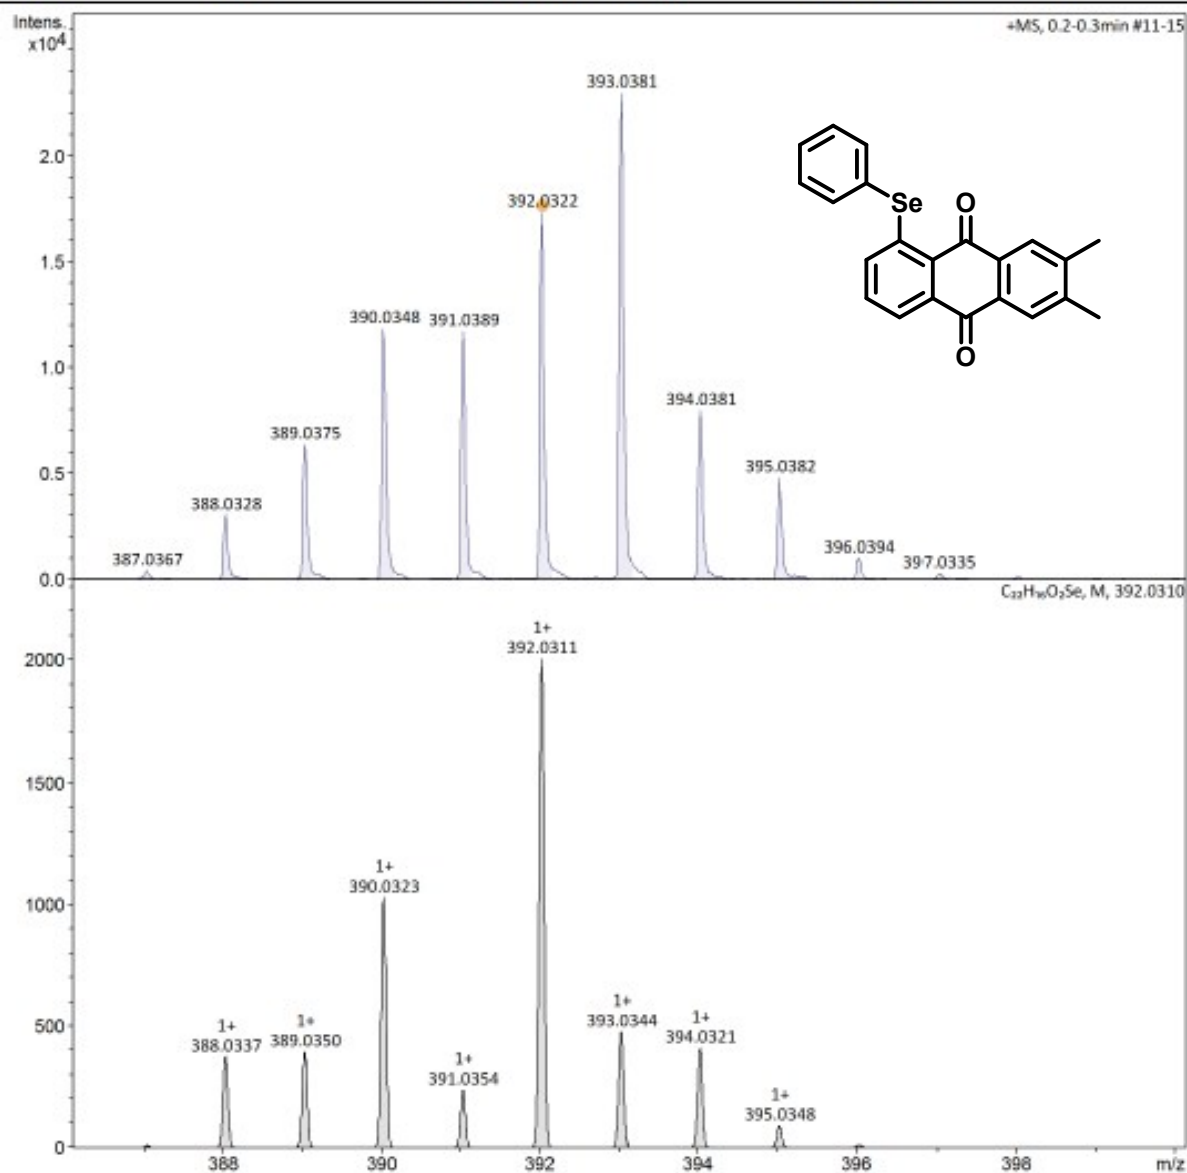

## HRMS (APPI<sup>+</sup>) of compound **2s**

### Display Report

| Analysis Info |                                                              | Acquisition Date 4/17/2019 11:29:18 AM |                         |
|---------------|--------------------------------------------------------------|----------------------------------------|-------------------------|
| Analysis Name | D:\Data\LabSELEN Marcelo QMC CFM 17-04-2019\ENSJ 873000002.d | Operator                               | tofq                    |
| Method        | DEFAULT_adptado 27 03 2019 APPI até limpeza.m                | Instrument                             | micrOTOF-Q 228888.10243 |
| Sample Name   | LabSELEN Marcelo QMC CFM 17-04-2019                          |                                        |                         |
| Comment       |                                                              |                                        |                         |

| Acquisition Parameter |            |                       |           |                  |           |
|-----------------------|------------|-----------------------|-----------|------------------|-----------|
| Source Type           | APPI       | Ion Polarity          | Positive  | Set Nebulizer    | 1.5 Bar   |
| Focus                 | Not active | Set Capillary         | 1500 V    | Set Dry Heater   | 200 °C    |
| Scan Begin            | 50 m/z     | Set End Plate Offset  | -500 V    | Set Dry Gas      | 2.0 l/min |
| Scan End              | 3000 m/z   | Set Collision Cell RF | 600.0 Vpp | Set Divert Valve | Source    |

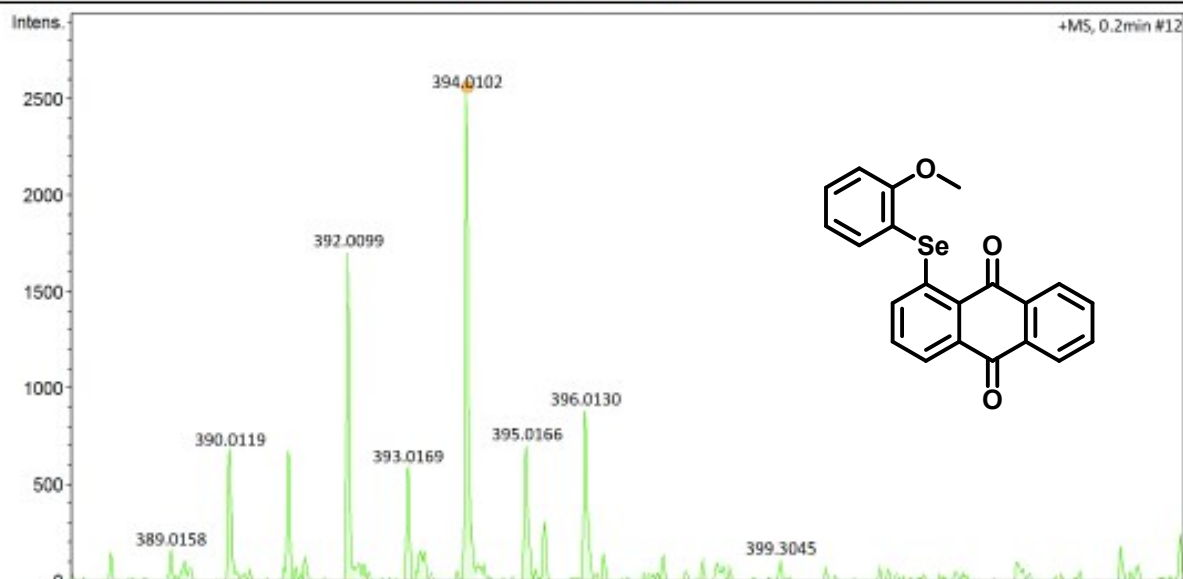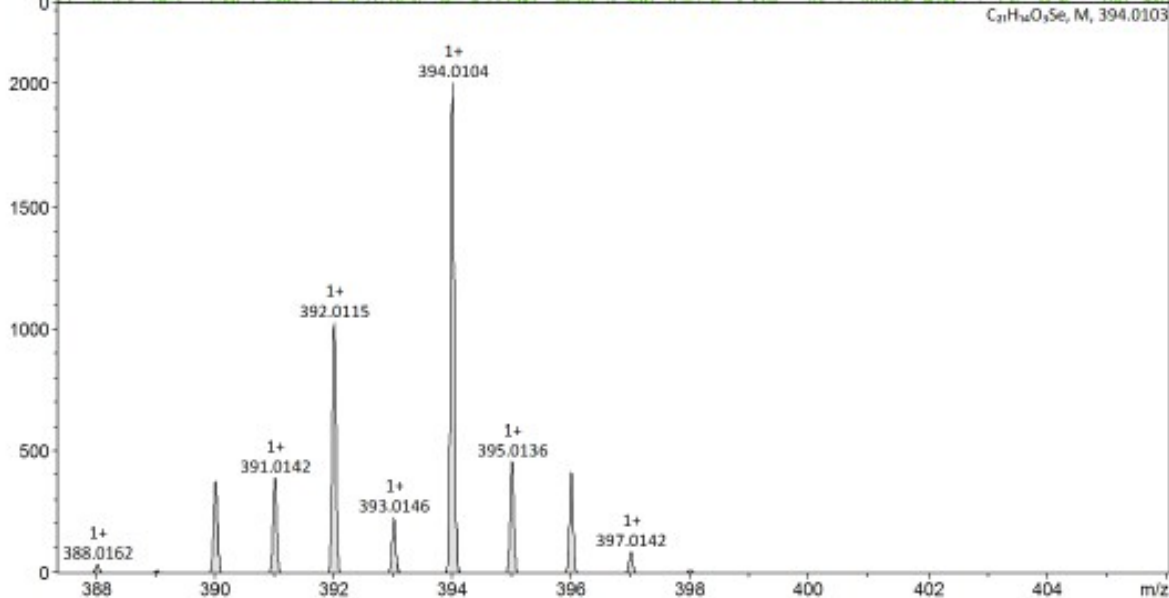

# HRMS (APPI+) of compound 2t

## Display Report

### Analysis Info

|               |                                                                              |                  |                         |
|---------------|------------------------------------------------------------------------------|------------------|-------------------------|
| Analysis Name | D:\Data\2019\Q-TOF\LabSELEN\LabSELEN Marcelo QMC CFM 10-06-2019\8900000001.d | Acquisition Date | 8/10/2019 2:46:43 PM    |
| Method        | appi 10 06 19.m                                                              | Operator         | micrOTOF-QII            |
| Sample Name   | 890                                                                          | Instrument       | micrOTOF-Q 228888.10243 |
| Comment       |                                                                              |                  |                         |

### Acquisition Parameter

|             |            |                       |           |                  |           |
|-------------|------------|-----------------------|-----------|------------------|-----------|
| Source Type | APPI       | Ion Polarity          | Positive  | Set Nebulizer    | 1.5 Bar   |
| Focus       | Not active | Set Capillary         | 1500 V    | Set Dry Heater   | 200 °C    |
| Scan Begin  | 50 m/z     | Set End Plate Offset  | -500 V    | Set Dry Gas      | 2.0 l/min |
| Scan End    | 2000 m/z   | Set Collision Cell RF | 300.0 Vpp | Set Divert Valve | Source    |

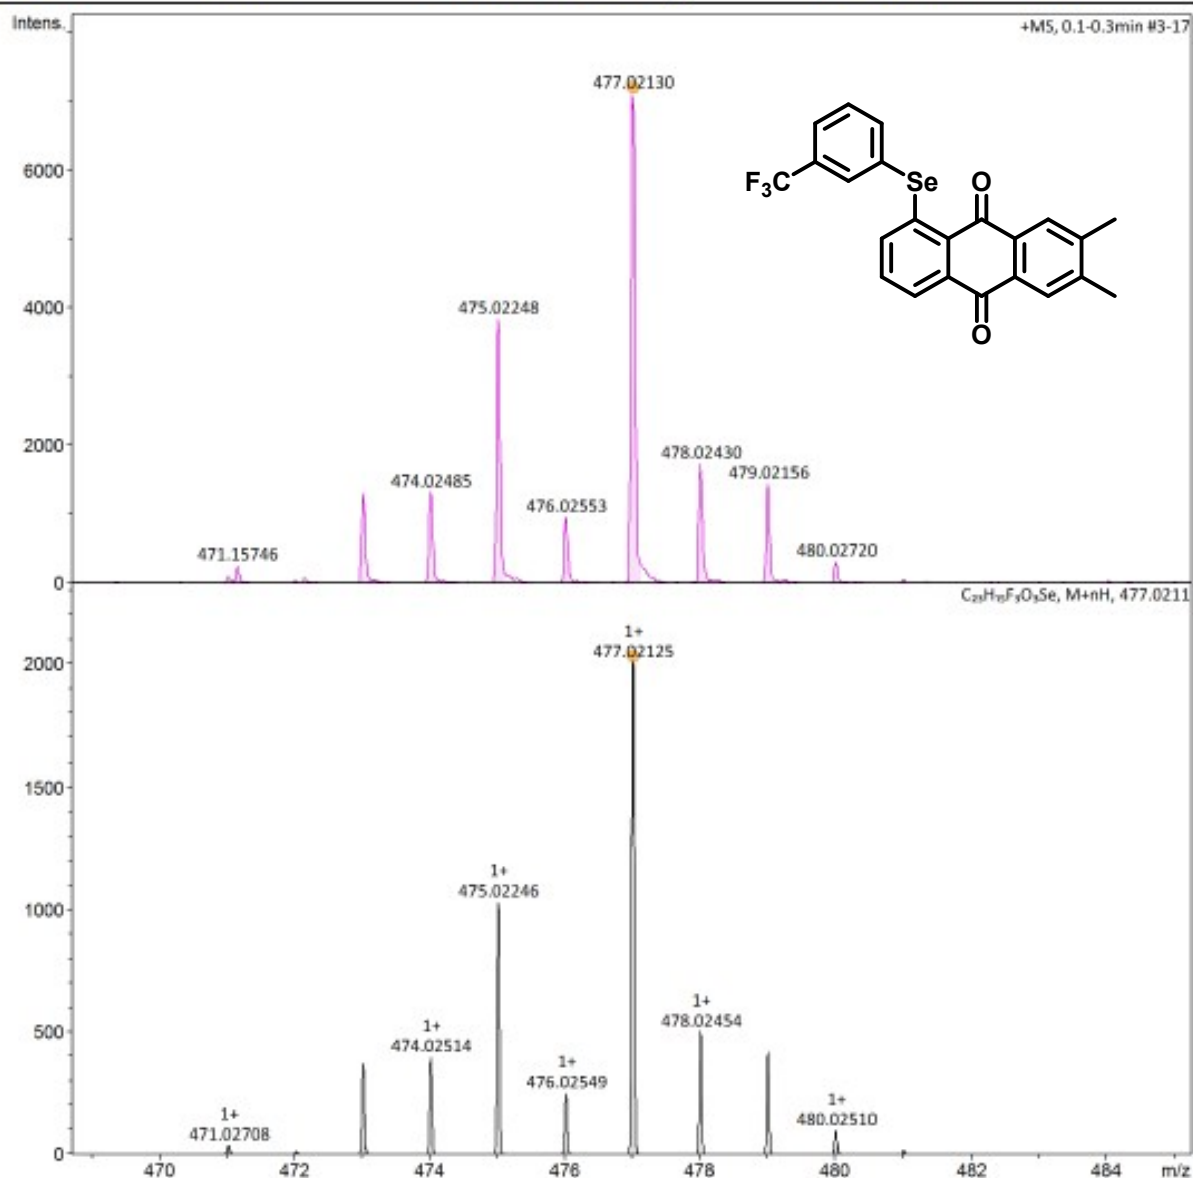

# HRMS (APPI<sup>+</sup>) of compound **2u**

## Display Report

### Analysis Info

|               |                                                                             |                  |                         |
|---------------|-----------------------------------------------------------------------------|------------------|-------------------------|
| Analysis Name | D:\Data\2019\Q-TOF\LabSELEN\LabSELEN Marcelo QMC CFM 10-06-2019\891000002.d | Acquisition Date | 6/10/2019 3:42:11 PM    |
| Method        | appi 10 06 19.m                                                             | Operator         | micrOTOF-QII            |
| Sample Name   | 891                                                                         | Instrument       | micrOTOF-Q 228888.10243 |
| Comment       |                                                                             |                  |                         |

### Acquisition Parameter

|             |            |                       |           |                  |           |
|-------------|------------|-----------------------|-----------|------------------|-----------|
| Source Type | APPI       | Ion Polarity          | Positive  | Set Nebulizer    | 1.5 Bar   |
| Focus       | Not active | Set Capillary         | 1500 V    | Set Dry Heater   | 200 °C    |
| Scan Begin  | 50 m/z     | Set End Plate Offset  | -500 V    | Set Dry Gas      | 2.0 l/min |
| Scan End    | 2000 m/z   | Set Collision Cell RF | 300.0 Vpp | Set Divert Valve | Source    |

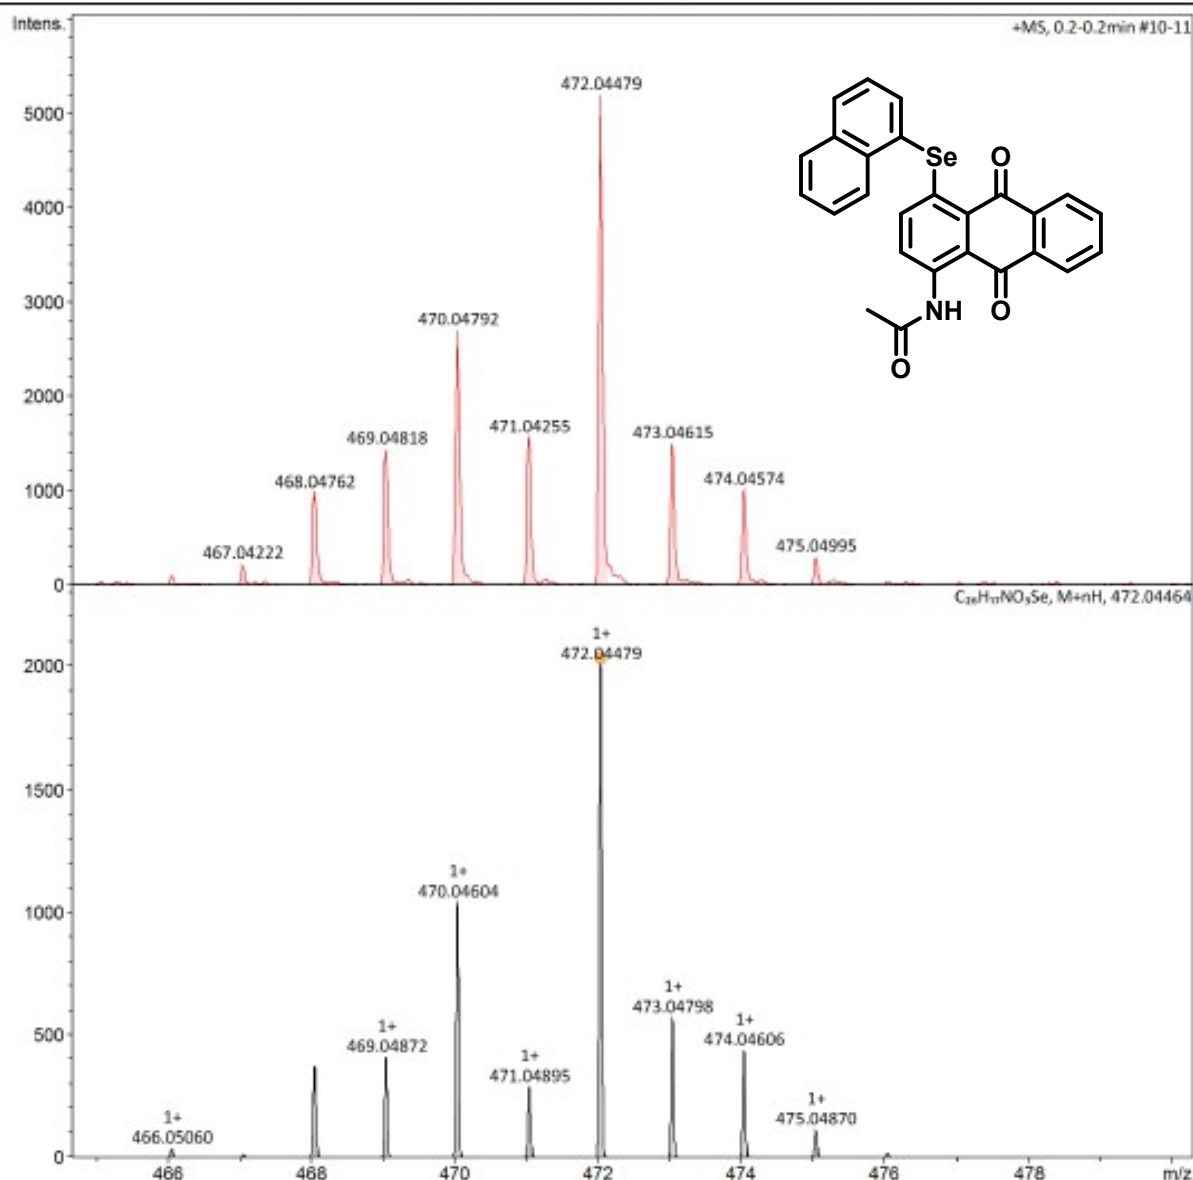

# HRMS (APPI<sup>+</sup>) of compound 2v

## Display Report

### Analysis Info

Analysis Name D:\Data\2019\Q-TOF\LabSELEN\LabSELEN Marcelo QMC CFM 10-06-2019\892000004.d  
 Method appi 10 06 19.m  
 Sample Name 892  
 Comment

Acquisition Date 6/10/2019 3:03:19 PM  
 Operator micrOTOF-QII  
 Instrument micrOTOF-Q 228888.10243

### Acquisition Parameter

|             |            |                       |           |                  |           |
|-------------|------------|-----------------------|-----------|------------------|-----------|
| Source Type | APPI       | Ion Polarity          | Positive  | Set Nebulizer    | 1.5 Bar   |
| Focus       | Not active | Set Capillary         | 1500 V    | Set Dry Heater   | 200 °C    |
| Scan Begin  | 50 m/z     | Set End Plate Offset  | -500 V    | Set Dry Gas      | 2.0 l/min |
| Scan End    | 2000 m/z   | Set Collision Cell RF | 300.0 Vpp | Set Divert Valve | Source    |

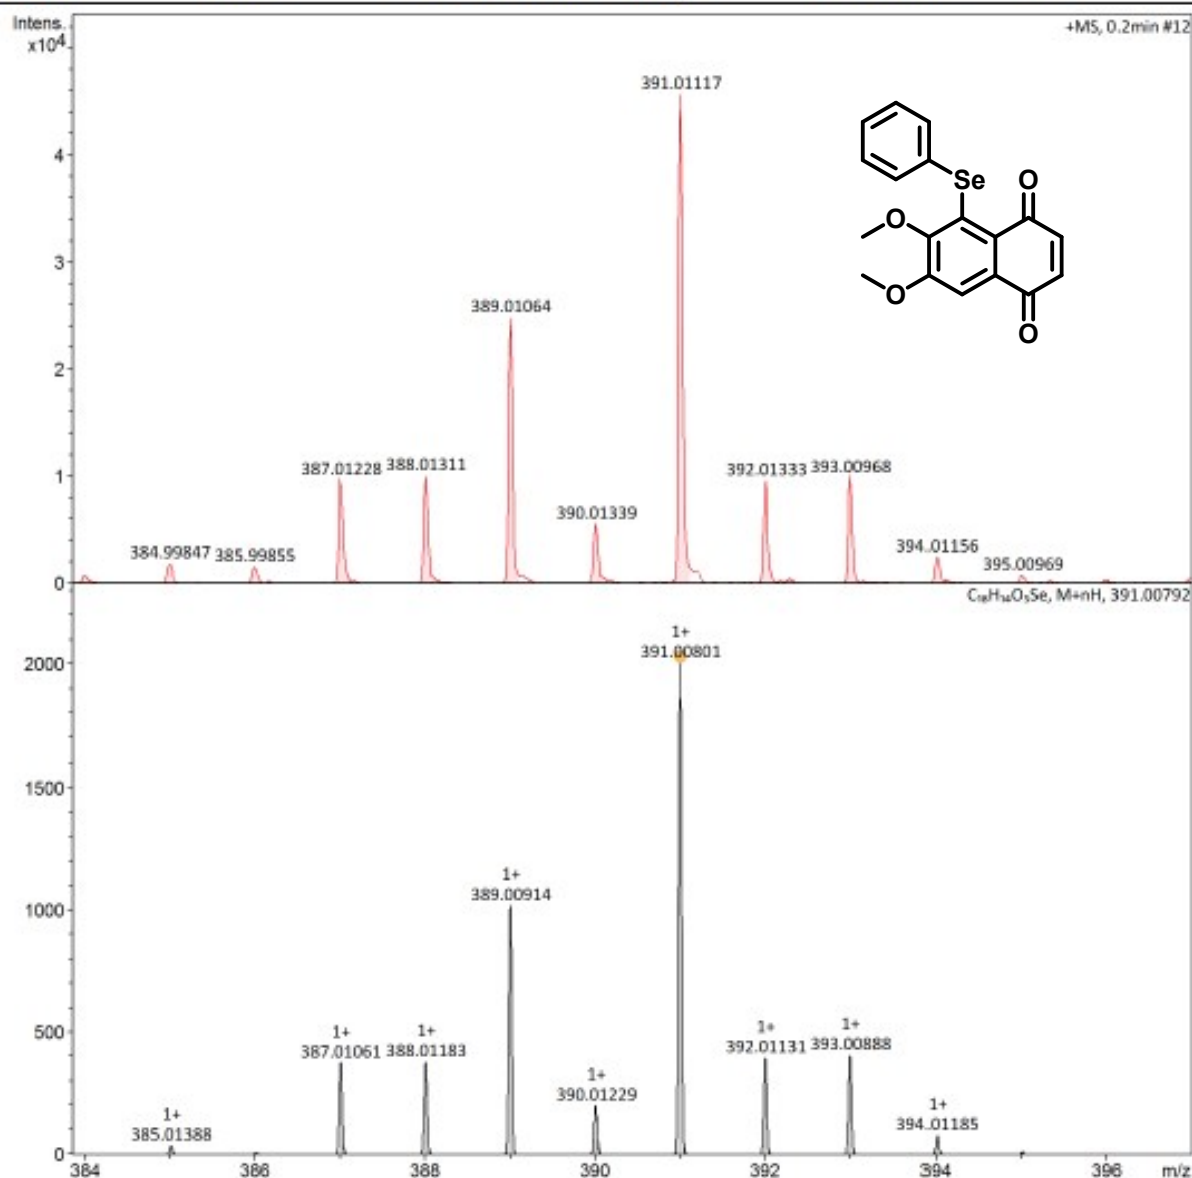

# HRMS (APPI<sup>+</sup>) of compound 2x

## Display Report

### Analysis Info

|                  |                                                                             |
|------------------|-----------------------------------------------------------------------------|
| Analysis Name    | D:\Data\2019\Q-TOF\LabSELEN\LabSELEN Marcelo QMC CFM 10-06-2019\893000002.d |
| Method           | appi 10 06 19.m                                                             |
| Sample Name      | 893                                                                         |
| Comment          |                                                                             |
| Acquisition Date | 8/10/2019 3:24:06 PM                                                        |
| Operator         | micrOTOF-QII                                                                |
| Instrument       | micrOTOF-Q 228888.10243                                                     |

### Acquisition Parameter

|             |            |                       |           |                  |           |
|-------------|------------|-----------------------|-----------|------------------|-----------|
| Source Type | APPI       | Ion Polarity          | Positive  | Set Nebulzer     | 1.5 Bar   |
| Focus       | Not active | Set Capillary         | 1500 V    | Set Dry Heater   | 200 °C    |
| Scan Begin  | 50 m/z     | Set End Plate Offset  | -500 V    | Set Dry Gas      | 2.0 l/min |
| Scan End    | 2000 m/z   | Set Collision Cell RF | 300.0 Vpp | Set Divert Valve | Source    |

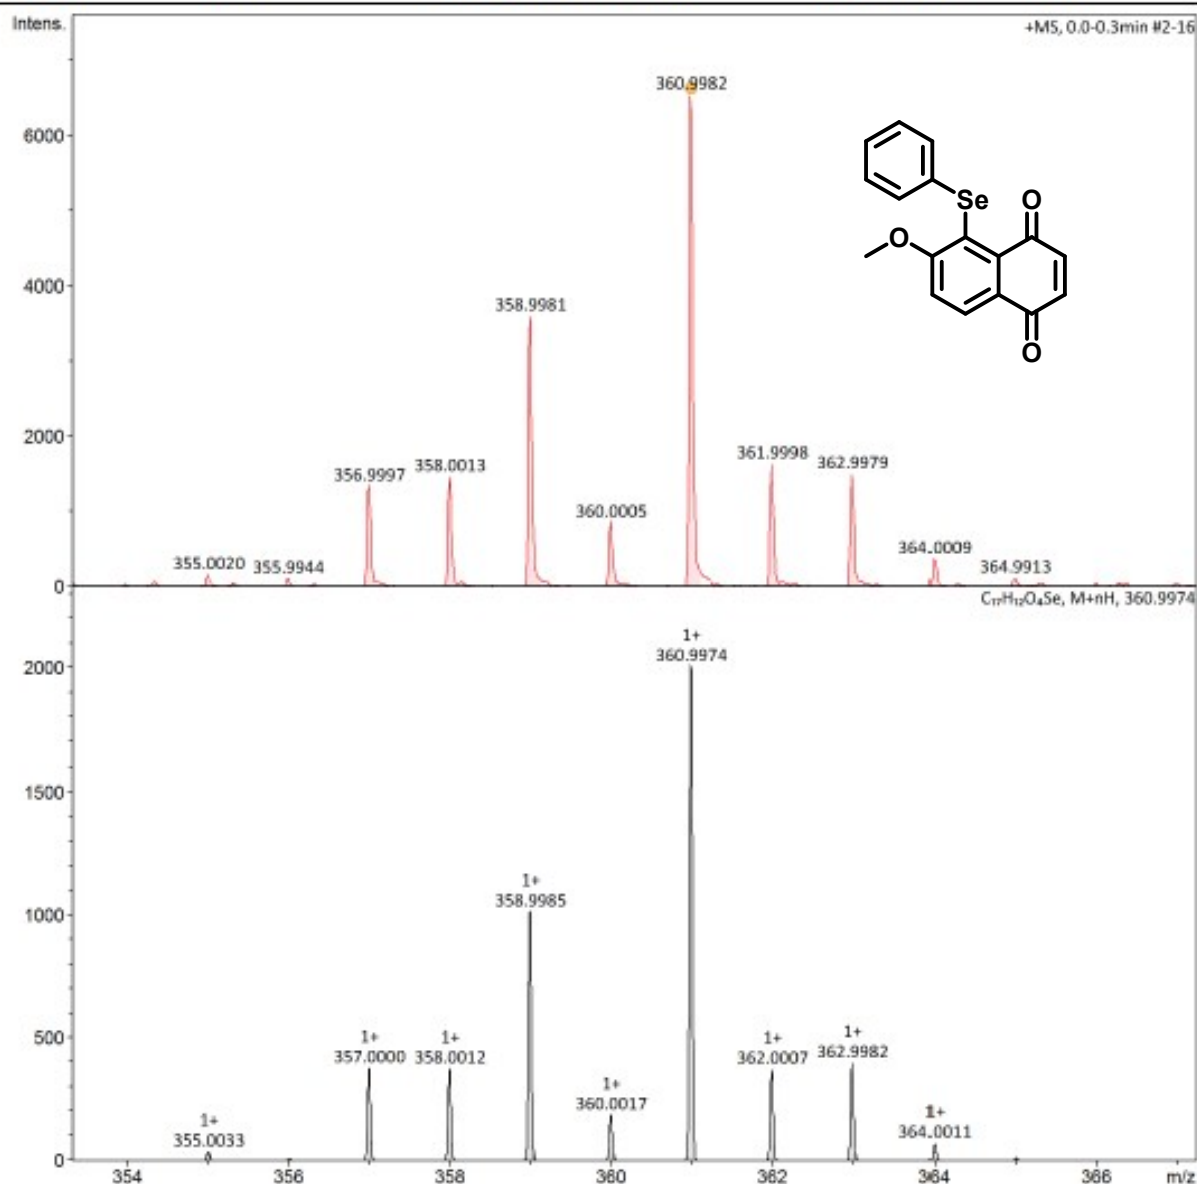

Supplement: c9nj02026h1.pdf [file c9nj02026h1.pdf]
